# Supplementary material for: RSC primes the quiescent genome for hypertranscription upon cell-cycle re-entry
Source: eLife. 2021 May 27;10:e67033. doi: 10.7554/eLife.67033 (PMC8186906; doi:10.7554/eLife.67033)
Supplement: Figure 1—figure supplement 1—source data 1. [file elife-67033-fig1-figsupp1-data1.xlsx]

## Sheet: Sheet1
baseMean	log2FoldChange	lfcSE	stat	pvalue	padj
YER065C	11754.3	-6.79133	0.565693	-12.0053	3.33152e-33	2.10952e-29
YIL057C	4739.58	-9.40574	0.801004	-11.7424	7.72197e-32	2.44477e-28
YMR104C	3479.29	-6.68235	0.634186	-10.5369	5.84003e-26	1.23264e-22
YCR010C	15607.6	-7.83062	0.760007	-10.3034	6.8044e-25	9.88444e-22
YMR303C	27496.2	-6.74384	0.672248	-10.0318	1.10517e-23	1.16632e-20
YGL037C	1718.86	-6.88165	0.699298	-9.8408	7.51101e-23	6.79425e-20
YJR095W	1668.26	-5.74498	0.587136	-9.78476	1.30904e-22	1.0361e-19
YLR312C	1541.64	-6.26878	0.648782	-9.66238	4.35617e-22	3.06481e-19
YKR097W	9331.48	-5.60081	0.609318	-9.19193	3.85854e-20	2.44323e-17
YKL187C	6571.23	-6.08342	0.66591	-9.1355	6.51048e-20	3.74767e-17
YLR377C	771.889	-6.01253	0.670437	-8.96808	3.01726e-19	1.59211e-16
YMR103C	432.733	-5.88645	0.681272	-8.64038	5.60285e-18	2.72902e-15
YNL194C	4304.66	-6.87035	0.799939	-8.5886	8.80337e-18	3.98164e-15
YPL147W	7679.55	-6.90508	0.807054	-8.55591	1.16946e-17	4.62813e-15
YDL085W	3623.5	-6.41995	0.772242	-8.3134	9.30016e-17	3.27159e-14
YMR118C	648.356	-6.06274	0.730369	-8.30093	1.03301e-16	3.44263e-14
YLR327C	5040.49	-7.38467	0.891651	-8.28202	1.21104e-16	3.81163e-14
YLL041C	1893.07	-5.18985	0.627028	-8.27691	1.26412e-16	3.81163e-14
YMR110C	3138.94	-5.88867	0.716709	-8.21626	2.09945e-16	5.77987e-14
YPL201C	3917.92	-5.65491	0.691885	-8.17319	3.0035e-16	7.92424e-14
YML100W	4711.41	-7.15545	0.881594	-8.11649	4.79846e-16	1.21535e-13
YKL026C	669.918	-6.44713	0.803558	-8.02323	1.02997e-15	2.41548e-13
YNL173C	583.491	-5.69934	0.71868	-7.93028	2.18649e-15	4.94458e-13
YGR067C	2960.81	-5.05135	0.644499	-7.83763	4.59115e-15	1.00245e-12
YPL054W	1612.18	-5.14024	0.657577	-7.81694	5.41213e-15	1.14232e-12
YIL160C	2093.36	-5.64922	0.724426	-7.7982	6.27941e-15	1.28262e-12
YEL011W	4657.95	-6.38052	0.821525	-7.76668	8.05721e-15	1.59432e-12
YPL186C	1993.87	-6.19455	0.803353	-7.71087	1.24959e-14	2.3977e-12
YJL163C	1177.99	-5.08681	0.660652	-7.69969	1.36397e-14	2.50568e-12
YOL126C	17529	-5.20333	0.676197	-7.69499	1.4151e-14	2.50568e-12
YLR149C	3405.75	-5.78203	0.751486	-7.69413	1.42458e-14	2.50568e-12
YFR053C	796.405	-4.95761	0.646116	-7.67295	1.68088e-14	2.87658e-12
YPL003W	287.601	-5.82106	0.767179	-7.58763	3.25819e-14	5.28996e-12
YJR036C	692.881	-5.6765	0.749177	-7.57698	3.53678e-14	5.59872e-12
YPL004C	5518.92	-6.17643	0.836805	-7.38097	1.57146e-13	2.42694e-11
YNL195C	2846.09	-6.36526	0.863386	-7.37244	1.67532e-13	2.52575e-11
YAL054C	39393.9	-6.34696	0.875033	-7.25339	4.0647e-13	5.79456e-11
YPR160W	496.384	-5.45913	0.752815	-7.25162	4.11806e-13	5.79456e-11
YDR256C	8961.88	-5.25885	0.727484	-7.22883	4.87183e-13	6.70618e-11
YDR171W	727.65	-5.87746	0.814179	-7.21889	5.24152e-13	7.03263e-11
YBR139W	1246.5	-5.36568	0.743521	-7.21658	5.33112e-13	7.03263e-11
YDL169C	231.181	-5.18512	0.720385	-7.1977	6.12359e-13	7.91318e-11
YDR070C	1197.12	-5.37071	0.746566	-7.19388	6.29746e-13	7.9751e-11
YIL136W	3905.42	-5.13387	0.715861	-7.17159	7.41302e-13	9.20377e-11
YKL151C	254.536	-6.0423	0.849152	-7.11569	1.11358e-12	1.356e-10
YOR019W	1167.82	-5.79338	0.818767	-7.07574	1.48657e-12	1.77603e-10
YFR017C	569.332	-4.81709	0.68282	-7.0547	1.72977e-12	2.02831e-10
YMR250W	1040.79	-5.40587	0.771036	-7.01119	2.36307e-12	2.72054e-10
YDL130W-A	789.881	-4.83838	0.691272	-6.99924	2.57358e-12	2.90998e-10
YNL270C	588.326	-4.64473	0.665311	-6.9813	2.92468e-12	3.24896e-10
YMR107W	2357.54	-5.31951	0.766503	-6.93997	3.92175e-12	4.28147e-10
YJL045W	1043.68	-5.10298	0.738039	-6.91424	4.70388e-12	5.0483e-10
YCL040W	2469.55	-5.87165	0.850058	-6.90735	4.93783e-12	5.21106e-10
YDR358W	671.19	-5.39663	0.782535	-6.89635	5.33571e-12	5.53864e-10
YML042W	8958.94	-5.50951	0.802188	-6.86811	6.50595e-12	6.64446e-10
YDR018C	451.802	-5.31103	0.774406	-6.8582	6.97314e-12	7.00856e-10
YBR050C	1520.6	-4.82611	0.704535	-6.85006	7.38197e-12	7.29322e-10
YHL032C	2832.42	-4.44003	0.648365	-6.84804	7.48672e-12	7.29322e-10
YIL124W	558.587	-5.22568	0.766716	-6.81567	9.38258e-12	8.9474e-10
YOR086C	2325.93	-5.03626	0.739065	-6.81438	9.4674e-12	8.9474e-10
YBR117C	3326.01	-6.51527	0.95794	-6.80133	1.03655e-11	9.65207e-10
YOR142W	1041.53	-4.86846	0.717031	-6.78974	1.12332e-11	1.03085e-09
YFL052W	174.056	-6.0166	0.886466	-6.78717	1.14351e-11	1.03439e-09
YGR130C	3125.07	-4.94023	0.728192	-6.78425	1.16695e-11	1.04072e-09
YKL065W-A	694.194	-5.60258	0.827256	-6.77249	1.26586e-11	1.11325e-09
YPL154C	3547.2	-5.04192	0.745126	-6.76654	1.31903e-11	1.14412e-09
YKR009C	5782.71	-5.1898	0.768175	-6.75602	1.41833e-11	1.19915e-09
YJL164C	1173.71	-5.33188	0.789229	-6.75582	1.42034e-11	1.19915e-09
YBR026C	978.347	-5.8277	0.863885	-6.74592	1.52063e-11	1.26643e-09
YBR230C	2383.81	-4.74965	0.70427	-6.74408	1.54004e-11	1.26643e-09
YBR214W	2312.54	-5.03525	0.753318	-6.6841	2.3235e-11	1.88621e-09
YLL026W	3463.8	-5.50224	0.829004	-6.63718	3.1975e-11	2.56286e-09
YGL251C	378.348	-4.84603	0.730374	-6.635	3.24501e-11	2.56843e-09
YMR206W	2708.32	-5.65328	0.853386	-6.62453	3.48344e-11	2.7231e-09
YBR126C	1117	-5.22151	0.788718	-6.62026	3.58577e-11	2.76892e-09
YNL200C	260.195	-5.1683	0.783066	-6.60009	4.10921e-11	3.13488e-09
YDR032C	267.852	-4.60231	0.698023	-6.59336	4.29994e-11	3.22216e-09
YDL218W	1697.84	-4.94394	0.749936	-6.59248	4.32538e-11	3.22216e-09
YKL107W	492.087	-4.59625	0.697826	-6.58653	4.50217e-11	3.31485e-09
YDL215C	15053.8	-4.70712	0.719595	-6.54135	6.09643e-11	4.43279e-09
YOL052C-A	4162.01	-4.59556	0.702707	-6.53979	6.16054e-11	4.43279e-09
YGR236C	8609.32	-5.5179	0.845012	-6.52997	6.57842e-11	4.68029e-09
YML089C	913.718	-5.05581	0.780876	-6.47454	9.51022e-11	6.69097e-09
YLR270W	955.37	-5.04148	0.779034	-6.47146	9.70621e-11	6.70912e-09
YNL241C	1431.27	-4.5317	0.700459	-6.46962	9.8248e-11	6.70912e-09
YML128C	12573.7	-6.12733	0.947158	-6.46918	9.85388e-11	6.70912e-09
YGR205W	232.933	-4.70574	0.727887	-6.46494	1.01339e-10	6.82639e-09
YBL064C	836.833	-4.90297	0.758748	-6.46192	1.03384e-10	6.89081e-09
YPL119C	1877.58	-4.17327	0.646861	-6.45157	1.107e-10	7.30156e-09
YIL099W	186.065	-5.42795	0.8474	-6.40541	1.49962e-10	9.68939e-09
YFL014W	7222.06	-4.50878	0.706984	-6.37749	1.80016e-10	1.15138e-08
YER015W	1365.26	-4.63703	0.729022	-6.36061	2.0095e-10	1.27238e-08
YOR285W	795.997	-4.32488	0.680113	-6.35907	2.0298e-10	1.27238e-08
YDL079C	621.231	-4.73307	0.744477	-6.35757	2.04964e-10	1.27238e-08
YDL204W	16516.5	-5.88434	0.928058	-6.34049	2.29042e-10	1.40805e-08
YOR185C	308.739	-4.61503	0.728604	-6.33407	2.38773e-10	1.42886e-08
YPR001W	1657.77	-3.92578	0.619814	-6.3338	2.39196e-10	1.42886e-08
YNL098C	1040.6	-4.26801	0.677002	-6.30428	2.89544e-10	1.71345e-08
YIL125W	5041.78	-3.89024	0.618189	-6.29297	3.11452e-10	1.82603e-08
YPL222W	1659.32	-4.32656	0.688655	-6.28262	3.32915e-10	1.93396e-08
YBL078C	898.577	-3.99909	0.639189	-6.2565	3.93705e-10	2.26631e-08
YKR058W	1182.25	-4.27029	0.683299	-6.24952	4.11713e-10	2.34862e-08
YDR085C	2526.31	-4.3773	0.702143	-6.2342	4.54104e-10	2.54947e-08
YPL203W	705.607	-4.26486	0.684293	-6.23251	4.59019e-10	2.54947e-08
YGR174W-A	158.546	-4.97818	0.798787	-6.23217	4.60025e-10	2.54947e-08
YGR174C	155.716	-4.70721	0.755433	-6.23115	4.63027e-10	2.54947e-08
YGR008C	1084.38	-5.4928	0.884725	-6.20848	5.3498e-10	2.89529e-08
YMR304W	6741.4	-3.96124	0.64186	-6.17151	6.76426e-10	3.62977e-08
YLR273C	648.882	-4.02219	0.652824	-6.16122	7.21874e-10	3.8411e-08
YCR101C	203.025	-4.08121	0.664467	-6.14208	8.14475e-10	4.29771e-08
YIL155C	3077.01	-4.21012	0.690308	-6.09891	1.06797e-09	5.54296e-08
YBR229C	1016.72	-4.12595	0.677041	-6.09408	1.10067e-09	5.6662e-08
YDL222C	8144.62	-5.4376	0.892604	-6.09184	1.11621e-09	5.69988e-08
YFR049W	113.826	-4.77073	0.78545	-6.07389	1.24852e-09	6.3245e-08
YJR039W	824.003	-3.99532	0.66244	-6.03123	1.62721e-09	8.11299e-08
YCR004C	647.405	-4.74906	0.787632	-6.02954	1.64429e-09	8.13411e-08
YKL188C	1393.44	-4.64625	0.771747	-6.02043	1.73959e-09	8.53881e-08
YDL197C	925.083	-4.40533	0.734044	-6.00146	1.95556e-09	9.41022e-08
YGL006W-A	201.807	-5.39924	0.899731	-6.00095	1.9617e-09	9.41022e-08
YOL048C	455.033	-4.0716	0.67963	-5.99091	2.08675e-09	9.9348e-08
YKL163W	12544.4	-3.73623	0.624048	-5.98708	2.13643e-09	1.00954e-07
YAL017W	2962.64	-3.99408	0.668038	-5.97882	2.24762e-09	1.05422e-07
YMR105C	756.374	-4.14251	0.69394	-5.96956	2.37897e-09	1.10762e-07
YER179W	250.755	-5.19909	0.875073	-5.94132	2.82736e-09	1.29731e-07
YNL093W	314.258	-4.27425	0.721195	-5.92663	3.09222e-09	1.40863e-07
YLR174W	1749.45	-3.81861	0.645302	-5.91755	3.26775e-09	1.47796e-07
YLR304C	4659.76	-3.77354	0.638103	-5.91368	3.34553e-09	1.5024e-07
YNL202W	416.878	-4.01474	0.679292	-5.91019	3.41722e-09	1.52379e-07
YIL101C	5350.59	-4.46801	0.757292	-5.89999	3.63522e-09	1.60967e-07
YPL166W	343.859	-4.18755	0.709925	-5.89858	3.66642e-09	1.61221e-07
YOL083W	775.921	-3.78787	0.642425	-5.89621	3.71955e-09	1.62429e-07
YIR036C	139.42	-4.36152	0.740419	-5.89061	3.84769e-09	1.66538e-07
YLR070C	144.105	-4.95786	0.841768	-5.88982	3.86624e-09	1.66538e-07
YHR087W	318.146	-5.14966	0.877517	-5.86844	4.39912e-09	1.88211e-07
YPL230W	2348.24	-4.20638	0.717313	-5.86409	4.51612e-09	1.9192e-07
YDR330W	552.497	-4.14493	0.709421	-5.84269	5.1363e-09	2.15385e-07
YBR056W	679.204	-4.64498	0.796703	-5.83025	5.53448e-09	2.29048e-07
YJL106W	1112.83	-3.71554	0.640925	-5.79715	6.74504e-09	2.75546e-07
YML004C	1660.3	-4.35683	0.752021	-5.79349	6.89391e-09	2.79822e-07
YJL141C	4273.14	-4.8378	0.836356	-5.78438	7.27782e-09	2.93523e-07
YKL093W	585.858	-3.62171	0.628371	-5.76364	8.23173e-09	3.29894e-07
YNL055C	1038.53	-4.7051	0.818901	-5.74562	9.15821e-09	3.64716e-07
YGL156W	1939.67	-3.88554	0.67865	-5.7254	1.03193e-08	4.08386e-07
YDR258C	2257.26	-4.5522	0.797134	-5.71071	1.12504e-08	4.42469e-07
YGR256W	540.408	-4.2624	0.74699	-5.70611	1.1559e-08	4.51799e-07
YNL117W	4228.19	-4.06041	0.715065	-5.67837	1.35982e-08	5.28245e-07
YNL015W	287.989	-4.7292	0.834334	-5.66824	1.44275e-08	5.53666e-07
YDR435C	219.606	-4.15424	0.73376	-5.66158	1.4999e-08	5.7213e-07
YKR011C	677.595	-4.29787	0.759398	-5.65958	1.5174e-08	5.75341e-07
YBL039W-B	76.8481	-5.61956	0.997501	-5.63363	1.76451e-08	6.65051e-07
YER067W	58.3087	-5.33881	0.948274	-5.63003	1.80177e-08	6.72296e-07
YNL009W	1429.39	-4.39688	0.781012	-5.62973	1.80496e-08	6.72296e-07
YML131W	804.595	-4.03777	0.718743	-5.61782	1.93378e-08	7.16064e-07
YKL217W	16534.9	-3.88401	0.691834	-5.61408	1.97614e-08	7.27495e-07
YOR328W	2772.01	-3.60986	0.643577	-5.60905	2.03435e-08	7.44597e-07
YLR037C	143.874	-3.87889	0.691822	-5.60677	2.06136e-08	7.50145e-07
YGR086C	4246.58	-4.955	0.884094	-5.60461	2.08728e-08	7.55238e-07
YDL194W	900.683	-4.15958	0.744602	-5.58632	2.31937e-08	8.34446e-07
YIR037W	334.252	-3.53421	0.635888	-5.5579	2.73033e-08	9.7126e-07
YBR149W	1196.23	-4.20669	0.757931	-5.55023	2.853e-08	1.00923e-06
YDR074W	6533.17	-4.77935	0.861677	-5.54656	2.91341e-08	1.02487e-06
YMR196W	2294.48	-4.23315	0.763974	-5.54096	3.0082e-08	1.05237e-06
YLR183C	127.973	-4.04426	0.730225	-5.53837	3.05303e-08	1.06219e-06
YIL028W	169.137	-3.74448	0.677325	-5.52833	3.23299e-08	1.11865e-06
YHR054C	1169.36	-4.06323	0.738175	-5.50443	3.70366e-08	1.26765e-06
YER121W	183.168	-4.6162	0.842107	-5.48173	4.21189e-08	1.42619e-06
YBR053C	215.294	-3.7141	0.678319	-5.47544	4.36433e-08	1.46994e-06
YEL012W	577.444	-3.40553	0.62293	-5.46696	4.5782e-08	1.53382e-06
YBR212W	4141.4	-3.43246	0.629161	-5.45561	4.88041e-08	1.62311e-06
YNR001C	2084.75	-3.28607	0.603317	-5.44667	5.13203e-08	1.6925e-06
YBR298C	835.35	-3.94084	0.725207	-5.43409	5.50783e-08	1.80702e-06
YOR173W	1484.38	-4.70191	0.865626	-5.4318	5.57874e-08	1.82085e-06
YDL019C	1485.93	-4.12139	0.760738	-5.41762	6.03967e-08	1.96119e-06
YKL141W	427.33	-3.7017	0.686158	-5.39482	6.8593e-08	2.21597e-06
YOR215C	541.978	-4.11563	0.763693	-5.38912	7.08032e-08	2.27576e-06
YMR160W	774.483	-3.85539	0.71558	-5.38778	7.13322e-08	2.28119e-06
YBR097W	803.983	-3.58724	0.668455	-5.36646	8.02949e-08	2.54214e-06
YOL087C	2145.5	-3.72674	0.696404	-5.3514	8.72752e-08	2.74939e-06
YDR384C	4969.12	-3.43932	0.642844	-5.35016	8.78771e-08	2.75464e-06
YKL150W	728.951	-4.12007	0.771	-5.3438	9.102e-08	2.83911e-06
YGL006W	3571.18	-4.3198	0.808865	-5.34056	9.26575e-08	2.87602e-06
YDR178W	397.961	-3.47342	0.651152	-5.33426	9.59354e-08	2.96323e-06
YEL041W	404.856	-3.59938	0.676402	-5.32136	1.02993e-07	3.16579e-06
YDR096W	4230.16	-3.61448	0.679897	-5.31622	1.05947e-07	3.24086e-06
YJL089W	11143.3	-3.96115	0.746595	-5.30562	1.12289e-07	3.40198e-06
YGL205W	5311.71	-4.23474	0.798459	-5.30364	1.13516e-07	3.42278e-06
YJL020C	2419.56	-3.8939	0.737616	-5.27903	1.29867e-07	3.86066e-06
YOL085C	86.8385	-4.41524	0.837037	-5.27484	1.32868e-07	3.93141e-06
YER054C	2848.4	-4.16949	0.793343	-5.2556	1.47546e-07	4.3454e-06
YKL168C	513.652	-3.38717	0.645195	-5.24984	1.52229e-07	4.46255e-06
YOR273C	5864.83	-3.9619	0.755395	-5.24481	1.56443e-07	4.56497e-06
YML091C	5483.56	-3.78105	0.721837	-5.23809	1.62248e-07	4.69446e-06
YGL250W	146.509	-3.68484	0.703488	-5.23796	1.62364e-07	4.69446e-06
YOR055W	148.656	-4.05145	0.776025	-5.22078	1.78172e-07	5.08192e-06
YCR100C	256.605	-3.52812	0.676405	-5.21599	1.82839e-07	5.19164e-06
YMR139W	861.673	-3.45124	0.662819	-5.20691	1.92006e-07	5.35975e-06
YPR158W	541.192	-3.47095	0.666621	-5.20678	1.92145e-07	5.35975e-06
YGR248W	220.597	-5.00567	0.962384	-5.20133	1.97872e-07	5.49529e-06
YHR138C	1112.62	-4.09819	0.788531	-5.19725	2.02261e-07	5.59264e-06
YJL185C	349.385	-3.74564	0.723205	-5.17923	2.22808e-07	6.134e-06
YGL227W	1646.16	-3.39289	0.656365	-5.16922	2.35079e-07	6.41604e-06
YDL223C	30975.6	-4.79342	0.927696	-5.16702	2.37859e-07	6.46404e-06
YIL100C-A	224.04	-4.81286	0.932824	-5.15945	2.47675e-07	6.70203e-06
YNR069C	121.53	-3.49586	0.679646	-5.14365	2.69456e-07	7.22964e-06
YJL103C	962.235	-3.12249	0.60734	-5.14125	2.72911e-07	7.29144e-06
YLR258W	464.091	-3.23509	0.631412	-5.12358	2.99788e-07	7.90941e-06
YER142C	344.879	-3.55897	0.69518	-5.11949	3.06363e-07	8.04933e-06
YLR164W	393.961	-3.41774	0.667787	-5.11801	3.0877e-07	8.07907e-06
YLR311C	97.8302	-4.37948	0.857808	-5.10543	3.30051e-07	8.60035e-06
YGL180W	3999.82	-3.50463	0.687066	-5.10086	3.38108e-07	8.77418e-06
YLR356W	606.968	-3.25873	0.63939	-5.09663	3.45762e-07	8.93619e-06
YMR261C	1248.84	-3.81521	0.749358	-5.0913	3.55609e-07	9.11626e-06
YKR003W	273.055	-3.49599	0.688788	-5.07557	3.86339e-07	9.82449e-06
YIL029C	84.6709	-3.9131	0.771185	-5.07414	3.89247e-07	9.85886e-06
YMR280C	3342.7	-3.53866	0.698556	-5.06568	4.06942e-07	1.0266e-05
YPR191W	620.484	-3.51849	0.695201	-5.06111	4.16824e-07	1.04735e-05
YAL028W	487.584	-3.49519	0.691156	-5.05702	4.25854e-07	1.06581e-05
YDL234C	8128.54	-3.95023	0.78301	-5.04493	4.53694e-07	1.13102e-05
YMR036C	4350.16	-3.5515	0.708366	-5.01365	5.34081e-07	1.32102e-05
YPL200W	302.902	-4.08007	0.814936	-5.00662	5.53952e-07	1.35954e-05
YPR002W	758.376	-3.07938	0.615372	-5.00409	5.61265e-07	1.37217e-05
YBR280C	752.036	-3.41968	0.683914	-5.00017	5.72809e-07	1.39501e-05
YDR034W-B	1978.49	-3.54384	0.709045	-4.99805	5.7912e-07	1.40498e-05
YBR059C	2188.4	-3.38327	0.680633	-4.97077	6.66882e-07	1.60559e-05
YMR297W	1597.55	-3.7264	0.750565	-4.96479	6.87766e-07	1.6496e-05
YNL092W	168.126	-3.59944	0.725666	-4.96018	7.04262e-07	1.68279e-05
YDR329C	915.823	-3.22214	0.650779	-4.9512	7.37578e-07	1.74267e-05
YGL208W	536.789	-2.90491	0.587013	-4.94863	7.47392e-07	1.75929e-05
YDL078C	741.731	-3.13121	0.634056	-4.93839	7.87717e-07	1.83976e-05
YOR289W	170.956	-3.72207	0.7538	-4.93775	7.90294e-07	1.83976e-05
YFR015C	889.46	-3.90805	0.791652	-4.93658	7.95053e-07	1.84406e-05
YDL110C	932.609	-4.14686	0.841425	-4.92838	8.29122e-07	1.91606e-05
YGR043C	2170.76	-3.79321	0.770465	-4.92328	8.51063e-07	1.95961e-05
YGR180C	2763.26	-2.86658	0.582418	-4.92185	8.57281e-07	1.96678e-05
YGR254W	1566.37	-3.73407	0.761239	-4.90526	9.33055e-07	2.12522e-05
YPL113C	128.008	-3.67909	0.75286	-4.88681	1.02481e-06	2.32585e-05
YMR159C	201.117	-3.38858	0.693882	-4.88351	1.04213e-06	2.35671e-05
YJR044C	405.242	-3.2444	0.664593	-4.88178	1.05132e-06	2.36903e-05
YHR008C	1244.35	-3.48893	0.715278	-4.87773	1.07315e-06	2.40964e-05
YPL123C	594.242	-3.38024	0.694666	-4.866	1.1388e-06	2.54801e-05
YMR262W	109.843	-3.68506	0.758147	-4.86062	1.17022e-06	2.59993e-05
YGR289C	356.014	-3.25972	0.671015	-4.8579	1.18637e-06	2.6266e-05
YMR191W	3130.57	-3.07434	0.633405	-4.85368	1.21192e-06	2.66455e-05
YBR132C	1556.64	-2.9366	0.607389	-4.83479	1.33285e-06	2.90698e-05
YMR031C	1613.53	-4.39957	0.910068	-4.83433	1.33596e-06	2.90698e-05
YKR067W	2537.4	-3.40684	0.706139	-4.8246	1.40284e-06	3.04204e-05
YDR009W	403.821	-3.10287	0.644518	-4.81426	1.47748e-06	3.17132e-05
YBL045C	1232.4	-3.04019	0.633153	-4.80167	1.57351e-06	3.36603e-05
YGL059W	874.81	-3.35526	0.699041	-4.79981	1.58815e-06	3.37847e-05
YMR284W	467.1	-2.94846	0.614329	-4.79947	1.59085e-06	3.37847e-05
YJR008W	2685.33	-3.3354	0.697022	-4.78521	1.70805e-06	3.60512e-05
YGR019W	525.512	-3.15204	0.659797	-4.77729	1.77677e-06	3.73771e-05
YGR243W	2040.07	-3.13235	0.657626	-4.76312	1.90619e-06	3.97038e-05
YCR091W	1476.4	-3.80532	0.800835	-4.75169	2.01723e-06	4.16062e-05
YJL144W	585.501	-3.07004	0.646802	-4.74649	2.06973e-06	4.24127e-05
YOR161C	1543.12	-3.01416	0.635183	-4.74533	2.08162e-06	4.25188e-05
YIR038C	744.599	-3.12201	0.658624	-4.74019	2.13516e-06	4.34722e-05
YLR081W	63.0839	-4.16173	0.881242	-4.72257	2.32879e-06	4.72625e-05
YBR116C	80.1125	-5.87554	1.2446	-4.72083	2.34888e-06	4.75178e-05
YLR151C	410.092	-3.36294	0.713739	-4.71173	2.45624e-06	4.93744e-05
YDR490C	820.264	-3.02794	0.643461	-4.70571	2.52984e-06	5.06929e-05
YKL193C	301.431	-3.52196	0.748572	-4.7049	2.53991e-06	5.0734e-05
YBL075C	4315.57	-3.44274	0.73349	-4.69364	2.68391e-06	5.33097e-05
YIL017C	1766.11	-3.22963	0.688107	-4.6935	2.68569e-06	5.33097e-05
YHL035C	934.35	-2.69982	0.57613	-4.68613	2.78425e-06	5.49217e-05
YLR345W	1521.2	-3.18617	0.680244	-4.68386	2.81525e-06	5.53609e-05
YMR114C	523.89	-2.78201	0.595601	-4.67093	2.99845e-06	5.87807e-05
YIL107C	5184.38	-3.2209	0.689758	-4.66961	3.01776e-06	5.89767e-05
YEL008W	106.33	-3.52453	0.755019	-4.66813	3.03957e-06	5.90385e-05
YOL096C	128.469	-3.24775	0.696075	-4.66581	3.07409e-06	5.93068e-05
YPL248C	600.797	-3.31744	0.711081	-4.66535	3.081e-06	5.93068e-05
YPL223C	17106.6	-3.95315	0.849176	-4.65527	3.23553e-06	6.2083e-05
YPR010C-A	340.371	-2.97135	0.638433	-4.65413	3.25358e-06	6.22407e-05
YDR357C	543.05	-2.74257	0.59089	-4.64143	3.46009e-06	6.59919e-05
YDR148C	1161.39	-2.86697	0.618315	-4.63675	3.53922e-06	6.72983e-05
YER096W	845.682	-2.87117	0.62123	-4.62175	3.80518e-06	7.19235e-05
YHR137W	1506.58	-3.35264	0.725517	-4.62104	3.81817e-06	7.19543e-05
YBR072W	5187.29	-4.38319	0.94922	-4.61767	3.88072e-06	7.2916e-05
YOR018W	1043.38	-3.1727	0.687267	-4.6164	3.90451e-06	7.3146e-05
YDR379C-A	115.934	-3.8605	0.836428	-4.61547	3.92213e-06	7.32594e-05
YMR140W	1509.94	-3.14425	0.683202	-4.60223	4.18e-06	7.74574e-05
YPR005C	837.126	-2.89369	0.628783	-4.60205	4.18358e-06	7.74574e-05
YNL144C	2855.79	-3.54246	0.77027	-4.59898	4.24567e-06	7.83779e-05
YNL115C	2259.32	-3.30357	0.720099	-4.58766	4.48252e-06	8.22798e-05
YKL103C	263.444	-3.07338	0.669928	-4.58763	4.48303e-06	8.22798e-05
YBR286W	3453.42	-3.84644	0.840159	-4.57823	4.68935e-06	8.58178e-05
YDR255C	978.396	-2.92832	0.639947	-4.57587	4.74235e-06	8.65376e-05
YBR297W	883.758	-2.80974	0.614369	-4.57338	4.79926e-06	8.73245e-05
YMR169C	1551.04	-3.9406	0.861834	-4.57234	4.82299e-06	8.75047e-05
YNL014W	10185.9	-3.25854	0.713612	-4.56627	4.96483e-06	8.97669e-05
YKR049C	83.383	-3.73419	0.817862	-4.5658	4.97602e-06	8.97669e-05
YGR192C	1750.58	-3.79075	0.834472	-4.54269	5.55402e-06	9.93448e-05
YGL187C	364.004	-3.03091	0.668696	-4.53256	5.82717e-06	0.000103645
YER143W	584.353	-3.1152	0.688868	-4.5222	6.11998e-06	0.000108279
YPL109C	545.205	-3.08976	0.683343	-4.52154	6.13901e-06	0.000108279
YCL012C	406.271	-2.79956	0.622105	-4.50013	6.79109e-06	0.000119128
YGR088W	2779.15	-4.28129	0.951375	-4.50011	6.79172e-06	0.000119128
YHR016C	229.147	-3.14647	0.702764	-4.47728	7.5601e-06	0.000132239
YJL172W	1879.63	-2.99097	0.67417	-4.43651	9.14285e-06	0.000157745
YML120C	1011.15	-3.26661	0.736779	-4.43363	9.26592e-06	0.000159434
YDR276C	1878.25	-3.08686	0.696991	-4.42884	9.4741e-06	0.000162396
YLR303W	1020.71	-3.01727	0.681332	-4.42849	9.48932e-06	0.000162396
YHL030W-A	54.4009	-4.25336	0.961521	-4.42357	9.70837e-06	0.000165251
YJL166W	566.995	-2.99846	0.678576	-4.41875	9.92731e-06	0.000168525
YFR003C	203.172	-3.16801	0.71742	-4.41583	1.00621e-05	0.000170262
YPR172W	343.582	-2.9477	0.667598	-4.41538	1.00834e-05	0.000170262
YBR183W	414.458	-2.61895	0.593995	-4.40904	1.0383e-05	0.000173929
YDR516C	108.834	-3.13893	0.712061	-4.40823	1.0422e-05	0.000174122
YJR120W	210.493	-3.29348	0.747599	-4.4054	1.05588e-05	0.000175943
YOR113W	2690.53	-2.73127	0.620337	-4.40288	1.06821e-05	0.00017753
YDR196C	202.655	-2.95962	0.67279	-4.39903	1.08738e-05	0.000180243
YDL181W	324.741	-2.8291	0.644032	-4.3928	1.11902e-05	0.000184522
YML003W	445.496	-2.94946	0.672206	-4.38773	1.14539e-05	0.000188379
YGL047W	127.197	-3.27705	0.747227	-4.38561	1.15659e-05	0.000189729
YDR150W	6662.04	-3.00821	0.686143	-4.38423	1.16399e-05	0.000190449
YOL084W	6179.73	-3.74292	0.854567	-4.3799	1.18733e-05	0.000193768
YPL119C-A	381.089	-2.97194	0.6793	-4.375	1.21432e-05	0.000197662
YMR174C	465.5	-3.80421	0.8724	-4.36063	1.2969e-05	0.000209489
YMR175W-A	104.859	-2.96682	0.680793	-4.35789	1.31323e-05	0.000211587
YLL061W	792.646	-2.51823	0.578751	-4.35114	1.3543e-05	0.0002171
YIL002C	445.4	-2.80804	0.646309	-4.34473	1.39447e-05	0.000222974
YKL035W	449.606	-2.83086	0.652605	-4.33778	1.43929e-05	0.000228984
YHR139C	3502.43	-2.97899	0.690512	-4.31417	1.60202e-05	0.000252967
YDR204W	161.574	-3.10132	0.719087	-4.31285	1.61161e-05	0.000253272
YLR049C	110.239	-3.00594	0.69871	-4.30213	1.69164e-05	0.000264481
YDL022W	1723.72	-3.81727	0.889152	-4.29316	1.76146e-05	0.000274718
YLL040C	4126.3	-3.1746	0.739849	-4.29088	1.7797e-05	0.000276881
YNL274C	122.586	-3.18523	0.742638	-4.28908	1.79416e-05	0.000277555
YPR098C	235.62	-2.96197	0.690644	-4.2887	1.79718e-05	0.000277555
YOR230W	3348.5	-3.24668	0.75754	-4.28582	1.82066e-05	0.000280497
YEL049W	50.2513	-3.42478	0.800342	-4.27914	1.87616e-05	0.000286953
YBR086C	4310.36	-2.99351	0.69985	-4.27736	1.89124e-05	0.000287834
YMR315W	1984.59	-3.23553	0.756488	-4.27704	1.89398e-05	0.000287834
YML110C	199.759	-2.73046	0.638429	-4.27685	1.89556e-05	0.000287834
YOR178C	14997.8	-2.86312	0.66971	-4.27516	1.91e-05	0.000289334
YLL023C	472.437	-2.85878	0.668923	-4.27371	1.9225e-05	0.000290531
YDR216W	5640.84	-2.85339	0.668842	-4.26616	1.98866e-05	0.000299815
YML002W	774.958	-2.7539	0.647285	-4.25454	2.09482e-05	0.000315069
YML048W	1378.25	-2.88716	0.680631	-4.24189	2.21647e-05	0.00033179
YPL262W	767.371	-2.49615	0.588738	-4.23983	2.23691e-05	0.00033406
YNL045W	237.727	-2.9399	0.693897	-4.23679	2.26738e-05	0.000337812
YBR147W	665.968	-2.82854	0.668292	-4.23249	2.31115e-05	0.000342722
YCR099C	76.2306	-3.33007	0.787202	-4.23026	2.3342e-05	0.000345331
YJL102W	549.519	-3.15659	0.748088	-4.21954	2.448e-05	0.000361323
YLL015W	4503.44	-2.76937	0.65664	-4.21748	2.47047e-05	0.000362946
YBL099W	2086.25	-2.81071	0.667893	-4.20832	2.57282e-05	0.000376237
YOR348C	2767.55	-3.31466	0.788677	-4.20281	2.63616e-05	0.000384613
YJL142C	50.4495	-5.35082	1.27346	-4.20178	2.64822e-05	0.000385015
YPR030W	2800	-3.03848	0.723183	-4.20154	2.65108e-05	0.000385015
YNL237W	396.396	-2.7094	0.64543	-4.19782	2.69495e-05	0.000389599
YCL039W	906.139	-2.67267	0.636896	-4.1964	2.71193e-05	0.00039116
YAL034C	1850.1	-3.17119	0.756315	-4.19295	2.75348e-05	0.000395352
YBL047C	4519.99	-2.98361	0.711707	-4.19219	2.76276e-05	0.000395788
YJR096W	369.528	-3.13143	0.747763	-4.18773	2.81756e-05	0.000402726
YBR128C	215.249	-2.6578	0.635558	-4.18185	2.89151e-05	0.000409599
YJR121W	1646.61	-2.81852	0.674198	-4.18055	2.9081e-05	0.000411029
YHR209W	675.941	-2.44288	0.584776	-4.17746	2.94786e-05	0.000414796
YMR018W	3809.65	-3.26087	0.781308	-4.1736	2.9982e-05	0.000420944
YEL024W	1002.85	-2.7288	0.655399	-4.16357	3.13304e-05	0.000436969
YDL126C	4589.4	-3.04629	0.73351	-4.15303	3.28102e-05	0.000455601
YOR347C	564.625	-2.57295	0.61999	-4.14999	3.32483e-05	0.000460674
YFL054C	295.048	-2.70547	0.652247	-4.14793	3.35496e-05	0.00046214
YCR075C	68.5191	-3.30027	0.795674	-4.14777	3.3573e-05	0.00046214
YDL027C	575.662	-2.68522	0.64832	-4.14181	3.44571e-05	0.000471807
YCL057W	725.769	-2.94169	0.710289	-4.14154	3.44989e-05	0.000471807
YKL117W	532.305	-3.04256	0.736112	-4.13328	3.57617e-05	0.00048537
YOL147C	792.785	-2.60975	0.631433	-4.13306	3.57972e-05	0.00048537
YAR035W	2195.05	-2.79825	0.677233	-4.13188	3.59811e-05	0.000486822
YGL010W	486.36	-2.84363	0.688377	-4.13092	3.61309e-05	0.000487806
YFL055W	520.7	-2.56249	0.622436	-4.11687	3.84052e-05	0.000514898
YNL138W	537.248	-2.86213	0.695845	-4.11318	3.90249e-05	0.00052132
YPR151C	740.517	-3.202	0.780456	-4.10274	4.08294e-05	0.000543784
YDR529C	607.883	-2.56807	0.626057	-4.10197	4.09641e-05	0.000543784
YMR053C	1293.79	-2.90779	0.709323	-4.0994	4.1423e-05	0.000547579
YBL101C	6335.42	-2.68548	0.655385	-4.09756	4.17521e-05	0.00055078
YIL072W	180.301	-2.78982	0.68114	-4.0958	4.20709e-05	0.000553831
YLR178C	321.364	-3.60888	0.883412	-4.08517	4.40455e-05	0.000578622
YPR006C	923.305	-2.83999	0.695421	-4.08384	4.42975e-05	0.000580492
YHR160C	242.355	-2.9066	0.71219	-4.08121	4.48014e-05	0.000584913
YGR110W	390.845	-2.78994	0.684649	-4.07499	4.60166e-05	0.000599541
YFL007W	10563.6	-2.83605	0.696518	-4.07175	4.66604e-05	0.000604085
YHR080C	2094.23	-2.79848	0.687363	-4.07132	4.6747e-05	0.000604085
YML127W	698.808	-2.59375	0.639339	-4.05693	4.97217e-05	0.000639914
YMR006C	1175.56	-2.33921	0.57754	-4.0503	5.11524e-05	0.000654538
YGL121C	495.771	-2.56231	0.633328	-4.04579	5.21459e-05	0.000665701
YDR099W	3394.43	-3.03827	0.751936	-4.0406	5.33138e-05	0.000679242
YHR001W-A	156.846	-2.90347	0.718875	-4.03891	5.37009e-05	0.0006828
YKR091W	1174.76	-2.40488	0.59626	-4.03327	5.50049e-05	0.000697978
YHL021C	182.586	-2.89281	0.719705	-4.01943	5.83392e-05	0.000735864
YDR374C	228.144	-2.72967	0.679645	-4.01631	5.91157e-05	0.000744176
YDR225W	1727.3	-2.52588	0.63083	-4.00406	6.2264e-05	0.000779161
YOR351C	117.524	-3.379	0.845172	-3.99801	6.3878e-05	0.000797782
YMR175W	960.779	-3.17431	0.79623	-3.98667	6.70076e-05	0.000835221
YMR086W	1929.98	-2.85838	0.717314	-3.98484	6.75266e-05	0.000836749
YDL018C	139.63	-2.90333	0.730975	-3.97186	7.13141e-05	0.000880236
YLR284C	764.657	-2.63096	0.663279	-3.9666	7.29041e-05	0.000896366
YKL129C	1325.98	-2.86029	0.721888	-3.96224	7.42514e-05	0.000911162
YBR018C	72.706	-3.03748	0.771378	-3.93773	8.22552e-05	0.00100162
YML054C	1167.6	-4.23347	1.07744	-3.92918	8.52363e-05	0.00103592
YOR180C	385.388	-2.47304	0.63132	-3.91725	8.95656e-05	0.00108231
YMR119W	947.426	-2.60535	0.66668	-3.90795	9.30843e-05	0.00112269
YOR208W	6415.61	-2.5523	0.653487	-3.90566	9.39689e-05	0.0011312
YKL195W	933.506	-2.98248	0.764571	-3.90085	9.5856e-05	0.00115173
YDR155C	690.897	-2.89613	0.742826	-3.8988	9.66714e-05	0.00115932
YDL004W	256.597	-2.51325	0.645943	-3.89083	9.99031e-05	0.00119356
YDR533C	505.494	-2.68724	0.691052	-3.88863	0.000100812	0.00120129
YER136W	1971.34	-2.84137	0.73074	-3.88835	0.00010093	0.00120129
YPR184W	2767.35	-3.59593	0.925571	-3.8851	0.000102289	0.00121518
YGL184C	1039.13	-2.60003	0.669329	-3.88453	0.000102526	0.00121573
YKL085W	474.83	-2.40975	0.622442	-3.87144	0.000108195	0.00128054
YKL034W	812.804	-2.3056	0.596162	-3.86741	0.000109996	0.00129828
YDR436W	592.62	-2.43894	0.630703	-3.86702	0.000110172	0.00129828
YEL060C	10591	-2.99307	0.774611	-3.86396	0.000111561	0.00131059
YJL068C	132.018	-2.70692	0.700657	-3.8634	0.000111819	0.00131118
YOL113W	633.932	-2.47251	0.641582	-3.85378	0.000116309	0.0013538
YIL073C	295.979	-2.33452	0.606416	-3.84971	0.000118258	0.00137144
YDL029W	567.386	-2.69296	0.700192	-3.84602	0.00012005	0.00138715
YMR158C-A	66.5723	-3.09972	0.810288	-3.82546	0.000130529	0.00149459
YBR234C	293.689	-2.44088	0.638908	-3.8204	0.000133238	0.00152286
YKL065C	666.304	-2.49617	0.65357	-3.81929	0.000133838	0.00152577
YGR053C	124.16	-2.7351	0.716761	-3.81592	0.000135674	0.00154235
YPL044C	29.8902	-3.80497	0.997367	-3.81502	0.000136175	0.00154526
YBR224W	49.0206	-3.13638	0.824474	-3.8041	0.000142323	0.00161215
YDL244W	19.0964	-4.54089	1.19847	-3.78891	0.000151309	0.00169573
YKL162C	395.282	-2.55472	0.674782	-3.786	0.00015309	0.00170964
YOR137C	874.725	-2.70007	0.713875	-3.78228	0.000155401	0.00173239
YHL030W	4549.91	-2.73897	0.724391	-3.78106	0.00015616	0.0017378
YDL149W	1857.35	-2.51407	0.666982	-3.76933	0.000163689	0.0018152
YJL199C	55.5265	-3.02605	0.804017	-3.76367	0.000167439	0.00185354
YJR094C	3276.42	-3.11604	0.830214	-3.75329	0.000174526	0.00192526
YGL146C	481.471	-2.39211	0.637894	-3.75001	0.000176826	0.00194724
YKL152C	497.305	-2.5406	0.67791	-3.74769	0.00017847	0.00196193
YGR026W	398.883	-2.27795	0.608508	-3.7435	0.000181475	0.0019915
YDR122W	2961.24	-2.73132	0.73019	-3.74056	0.000183609	0.00200797
YDR380W	968.853	-2.89699	0.775942	-3.73351	0.000188828	0.00205088
YIL009W	1154.4	-2.35547	0.632254	-3.72552	0.000194916	0.00211337
YHR007C-A	79.6166	-3.39184	0.911867	-3.71967	0.000199485	0.00215553
YCR030C	1301.62	-2.47442	0.665999	-3.71535	0.000202924	0.00218895
YFL018C	724.502	-2.34557	0.631805	-3.71249	0.000205234	0.00220635
YJR005C-A	22.8415	-4.73313	1.27519	-3.71171	0.000205863	0.00220791
YLR194C	6924.23	-3.06736	0.826461	-3.71144	0.000206086	0.00220791
YHR050W-A	50.109	-3.20988	0.866004	-3.70654	0.000210113	0.00224277
YOR391C	153.051	-2.49675	0.673668	-3.7062	0.000210393	0.00224277
YJR059W	2010.21	-2.71305	0.732171	-3.70549	0.000210981	0.00224526
YGR144W	211.273	-2.73693	0.739011	-3.7035	0.000212641	0.00225535
YJL161W	233.843	-2.71888	0.734347	-3.70244	0.000213533	0.00226102
YIL033C	985.425	-2.36372	0.638887	-3.69975	0.000215812	0.00227753
YBL065W	57.8019	-3.35966	0.909155	-3.69537	0.000219569	0.00230566
YGR201C	257.43	-2.4504	0.663236	-3.69462	0.000220217	0.00230863
YMR105W-A	19.1846	-4.95592	1.34342	-3.68904	0.000225105	0.0023467
YDR536W	417.069	-2.61759	0.709609	-3.68878	0.000225331	0.0023467
YDR293C	12515.4	-2.56093	0.694976	-3.68492	0.000228775	0.00237492
YKR105C	430.766	-2.2534	0.611523	-3.6849	0.000228791	0.00237492
YFR044C	193.778	-2.28825	0.621409	-3.68235	0.000231093	0.00239489
YJL066C	272.774	-2.44443	0.664093	-3.68085	0.000232454	0.00240089
YGL104C	209.944	-2.4006	0.652315	-3.68012	0.00023312	0.00240089
YDL113C	1051.42	-2.55311	0.693777	-3.68001	0.000233223	0.00240089
YIL045W	936.071	-2.51142	0.682471	-3.67989	0.000233333	0.00240089
YOR124C	1949.46	-2.75417	0.74849	-3.67964	0.000233567	0.00240089
YPL247C	299.339	-2.35123	0.640282	-3.67218	0.000240491	0.00246406
YMR106C	317.709	-2.31113	0.630521	-3.66543	0.000246924	0.00252181
YJR033C	1159.28	-2.30046	0.631438	-3.64321	0.000269254	0.00272787
YKL171W	2149.67	-2.37471	0.653447	-3.63413	0.000278918	0.00279891
YBR299W	24.8421	-4.02564	1.11227	-3.6193	0.000295396	0.00295489
YLR454W	3815.7	-2.80721	0.776369	-3.61582	0.000299403	0.00299025
YLR039C	760.531	-2.13317	0.590212	-3.61424	0.000301229	0.00300375
YGL161C	109.196	-2.42142	0.670926	-3.60907	0.000307293	0.0030594
YMR176W	1047.94	-2.1581	0.598246	-3.60738	0.000309302	0.00307456
YKL142W	952.091	-2.91313	0.809056	-3.60065	0.000317424	0.00315036
YDR285W	771.747	-2.41609	0.671908	-3.59586	0.000323321	0.00319885
YBR094W	863.034	-2.26501	0.630264	-3.59374	0.00032596	0.00321993
YJR122W	708.263	-2.31932	0.646279	-3.58872	0.0003323	0.00326727
YER042W	244.169	-2.36697	0.661426	-3.57858	0.000345468	0.00337577
YOL159C	478.236	-2.09823	0.587512	-3.57137	0.000355116	0.0034642
YMR076C	750.847	-2.2665	0.635964	-3.56388	0.000365414	0.00354334
YIL097W	663.924	-2.28278	0.640893	-3.56188	0.000368208	0.00356475
YGR183C	602.21	-2.2019	0.618362	-3.56086	0.000369636	0.00356475
YBL100W-C	21.2487	-4.11449	1.15675	-3.55693	0.00037521	0.00361068
YNL077W	642.979	-2.18545	0.614568	-3.55607	0.000376438	0.003617
YKL050C	2544.81	-2.44695	0.68841	-3.55449	0.000378707	0.00363329
YOR227W	2686.91	-2.41194	0.678645	-3.55405	0.000379343	0.00363389
YDR342C	135.595	-2.644	0.744393	-3.55188	0.000382486	0.00365294
YNL332W	17.1238	-4.87393	1.3761	-3.54185	0.000397331	0.0037833
YCR006C	445.482	-2.48193	0.702031	-3.53536	0.000407219	0.00386583
YJL155C	2425.02	-2.0508	0.580599	-3.53221	0.000412095	0.00390627
YGL080W	572.543	-2.45795	0.699026	-3.51624	0.000437698	0.00413041
YNL305C	812.994	-2.24317	0.638178	-3.51496	0.000439828	0.00414433
YBL067C	4208.1	-2.56197	0.72956	-3.51167	0.000445307	0.00418972
YDR534C	279.51	-2.37665	0.676908	-3.51104	0.000446362	0.00419342
YLR043C	201.088	-2.30534	0.656673	-3.51063	0.000447038	0.00419355
YFR052C-A	9.46143	-7.02926	2.01143	-3.49467	0.000474655	0.00442639
YOL129W	351.728	-2.11994	0.608486	-3.48395	0.000494066	0.00458042
YCR012W	673.87	-2.40365	0.690555	-3.48076	0.000499999	0.00462865
YER081W	3103.23	-2.64187	0.759729	-3.47739	0.000506325	0.00467354
YOL122C	1102.51	-2.04314	0.587647	-3.47682	0.000507407	0.00467671
YKL221W	264.668	-2.34695	0.676731	-3.46806	0.000524223	0.0048107
YJR099W	80.2168	-2.40447	0.696373	-3.45284	0.000554716	0.0050394
YFR014C	692.038	-2.42096	0.706063	-3.42882	0.000606214	0.00546802
YJL036W	1105.94	-2.27616	0.66484	-3.42363	0.000617918	0.00554987
YDL160C	4901.89	-2.33193	0.68198	-3.41934	0.000627722	0.00562157
YAL030W	107.553	-2.42315	0.708735	-3.41898	0.000628565	0.00562157
YOL109W	4187.27	-2.75457	0.806767	-3.41433	0.000639387	0.00571029
YPR115W	1793.73	-2.22172	0.651756	-3.40883	0.000652433	0.0058186
YBR138C	235.81	-2.14092	0.628358	-3.40717	0.000656407	0.00584365
YOR228C	194.2	-2.13351	0.626236	-3.40689	0.000657087	0.00584365
YHR106W	286.852	-2.26215	0.664298	-3.40533	0.000660849	0.00586886
YGL229C	32.8158	-3.28265	0.966896	-3.39504	0.000686181	0.00606694
YJR061W	2172.34	-2.22444	0.655264	-3.39472	0.000686986	0.00606694
YHR097C	2541.59	-2.29756	0.677965	-3.38891	0.000701719	0.00617123
YKL126W	1279.39	-2.25479	0.666963	-3.38068	0.000723055	0.00634125
YHR004C	537.947	-2.35731	0.697828	-3.37807	0.000729954	0.00638526
YHR113W	707.384	-2.15306	0.637374	-3.37802	0.00073009	0.00638526
YBL058W	1102.07	-2.32717	0.690145	-3.372	0.000746245	0.00650857
YMR256C	294.281	-2.15002	0.637913	-3.37039	0.000750623	0.00651982
YDR077W	66023.8	-2.23458	0.663108	-3.36987	0.000752046	0.00652305
YBR009C	1694.85	-2.32381	0.689662	-3.3695	0.000753056	0.00652305
YGL197W	5783.98	-2.31829	0.689248	-3.36351	0.000769585	0.00663217
YKL091C	215.693	-2.41204	0.718164	-3.35863	0.000783303	0.00672982
YOR374W	22587.4	-2.81311	0.837914	-3.35728	0.000787121	0.00674431
YMR101C	116.859	-2.2617	0.673792	-3.35667	0.000788867	0.00675015
YDR197W	625.639	-1.98542	0.591711	-3.35539	0.000792543	0.00677245
YIL055C	1736.45	-2.2789	0.679436	-3.3541	0.000796247	0.00679122
YGR237C	794.365	-2.57973	0.769434	-3.35276	0.000800107	0.00680037
YIR014W	405.026	-2.25175	0.672173	-3.34996	0.000808229	0.00685102
YGR146C	6516.46	-2.3172	0.692459	-3.34634	0.000818858	0.00693183
YBR296C-A	17.0114	-4.72684	1.41347	-3.34415	0.000825341	0.00697738
YLR080W	267.318	-2.10027	0.628532	-3.34154	0.000833144	0.00703396
YOR352W	488.901	-2.20374	0.65995	-3.33925	0.00084004	0.0070682
YNR068C	58.6058	-2.57592	0.773552	-3.32999	0.000868496	0.0072885
YHR049C-A	59.7477	-2.47485	0.743907	-3.32682	0.000878417	0.00735732
YFL058W	8.18943	-6.82099	2.05168	-3.32458	0.000885513	0.00740696
YJL057C	632.29	-2.08974	0.629595	-3.31919	0.000902795	0.00753162
YOL110W	173.469	-2.15464	0.650032	-3.31466	0.000917545	0.00763455
YKL100C	2366.64	-2.34187	0.706714	-3.31375	0.000920547	0.00764948
YBR033W	167.854	-2.14897	0.652007	-3.29594	0.000980941	0.00810877
YIL137C	1016.23	-2.2954	0.697292	-3.29187	0.000995228	0.00821615
YDR031W	107.177	-2.28795	0.695193	-3.2911	0.000997958	0.00821707
YFR016C	1215.1	-1.95531	0.594184	-3.29074	0.000999234	0.00821707
YHL034C	699.892	-2.23753	0.681093	-3.28521	0.00101908	0.00833698
YHL024W	5151.43	-2.71399	0.826975	-3.28183	0.00103135	0.008407
YCR073C	1277.85	-2.53537	0.772625	-3.2815	0.00103257	0.008407
YDL206W	986.952	-2.1313	0.64956	-3.28114	0.00103387	0.008407
YDR277C	1098.82	-2.8545	0.870433	-3.27941	0.00104025	0.00843392
YGR109C	27.3571	-3.28209	1.00261	-3.27356	0.00106203	0.00859945
YER084W	237.374	-2.32036	0.708937	-3.27301	0.00106409	0.00860513
YBR241C	803.141	-2.47735	0.75731	-3.27125	0.00107074	0.00864787
YER030W	334.467	-2.23833	0.684397	-3.27052	0.00107351	0.00864975
YDR443C	1396.01	-1.89998	0.580952	-3.27047	0.00107371	0.00864975
YDR470C	432.292	-2.08553	0.638977	-3.26385	0.00109908	0.00880577
YOR176W	280.665	-2.40838	0.738413	-3.26156	0.00110802	0.00884741
YOL053W	239.104	-2.12491	0.651709	-3.26051	0.00111211	0.00886885
YDR377W	298.241	-2.10788	0.648211	-3.25184	0.0011466	0.00908316
YHR051W	150.205	-2.35125	0.723105	-3.2516	0.00114759	0.00908316
YDR512C	80.8591	-2.38451	0.735074	-3.2439	0.00117904	0.00931708
YJL060W	347.866	-2.359	0.728993	-3.23597	0.0012123	0.00953577
YDR284C	157.043	-2.07656	0.642104	-3.23399	0.00122075	0.00958728
YDR306C	657.022	-2.00035	0.619845	-3.22719	0.00125014	0.00977267
YIR016W	797.596	-2.42802	0.752758	-3.2255	0.00125752	0.00980424
YDR069C	2059.99	-1.98503	0.615434	-3.22542	0.00125788	0.00980424
YBR255C-A	242.851	-1.99825	0.619871	-3.22366	0.00126563	0.00983308
YJL001W	680.02	-2.19578	0.681694	-3.22107	0.00127714	0.00988613
YBR148W	192.282	-2.51597	0.783451	-3.2114	0.0013209	0.0101786
YDR335W	3357.61	-2.12542	0.661856	-3.2113	0.00132136	0.0101786
YLR069C	840.593	-1.89317	0.589642	-3.21072	0.00132402	0.0101855
YNL071W	545.693	-2.10428	0.656845	-3.20361	0.00135714	0.0104037
YBR088C	182.63	-2.05068	0.64078	-3.20029	0.00137291	0.0105118
YML075C	2823.75	-2.37167	0.741764	-3.19734	0.00138703	0.0106014
YPL127C	330.598	-2.00797	0.628223	-3.19627	0.00139214	0.0106078
YDR247W	1897.94	-2.24921	0.704857	-3.19102	0.00141773	0.0107768
YNL097C-B	47.5549	-2.68734	0.843246	-3.1869	0.00143809	0.0108923
YGL258W-A	26.1974	-2.98235	0.936115	-3.18588	0.00144316	0.0109047
YDR513W	317.084	-2.41151	0.757575	-3.18319	0.00145661	0.0109801
YGR244C	947.048	-2.46011	0.773129	-3.18202	0.00146251	0.0110115
YLR352W	820.125	-2.06695	0.649914	-3.18034	0.00147102	0.0110503
YKL007W	426.211	-2.19515	0.690232	-3.18031	0.00147116	0.0110503
YDR231C	283.136	-2.34995	0.73917	-3.17917	0.00147697	0.0110808
YLR006C	2019.58	-2.2903	0.72161	-3.17388	0.00150417	0.0112715
YLR308W	42.9046	-2.65986	0.838728	-3.1713	0.0015176	0.0113587
YNR034W-A	107.438	-2.8229	0.891271	-3.16727	0.00153876	0.0114899
YJL070C	924.043	-2.02489	0.640668	-3.16059	0.0015745	0.0117153
YJR065C	920.963	-2.06307	0.653722	-3.15588	0.00160015	0.0118922
YAL008W	101.965	-2.0977	0.66779	-3.14126	0.00168222	0.0124729
YML092C	729.091	-2.14973	0.684441	-3.14085	0.00168459	0.0124757
YGL206C	1861.97	-2.35211	0.749455	-3.13843	0.00169857	0.0125353
YGR231C	886.001	-1.93618	0.61721	-3.13698	0.00170695	0.0125825
YAL067C	406.707	-2.13626	0.68118	-3.13611	0.00171202	0.0125932
YML117W	4114.03	-2.01651	0.643983	-3.13131	0.0017403	0.0127821
YCL052C	457.637	-2.09295	0.668458	-3.131	0.0017421	0.0127821
YKL149C	546.108	-1.90235	0.607665	-3.13059	0.00174453	0.0127852
YIL087C	73.9217	-2.37514	0.759239	-3.12832	0.00175809	0.0128547
YPL075W	1072.77	-2.03422	0.65099	-3.12482	0.00177914	0.0129838
YIL051C	538.571	-2.04074	0.653687	-3.12189	0.00179691	0.0130482
YGR247W	212.778	-1.97166	0.631973	-3.11985	0.00180946	0.0131039
YCL035C	265.336	-1.99492	0.639473	-3.11963	0.00181078	0.0131039
YNR066C	467.93	-2.11826	0.679298	-3.11831	0.0018189	0.0131476
YLL062C	255.653	-1.94606	0.624533	-3.11603	0.00183306	0.0132197
YFL042C	501.281	-2.07975	0.667584	-3.11534	0.00183736	0.0132266
YER119C	299.453	-1.9878	0.638552	-3.11298	0.00185212	0.0132966
YML070W	439.915	-1.93752	0.622709	-3.11144	0.00186177	0.0133508
YDR369C	572.696	-1.87365	0.602475	-3.10993	0.00187131	0.013404
YIL075C	4157.92	-2.12659	0.68461	-3.10627	0.00189463	0.0135404
YML126C	1609.56	-2.04329	0.658738	-3.10183	0.00192331	0.0137298
YOL086C	5618.82	-2.7023	0.872803	-3.09611	0.00196075	0.0139657
YHR110W	203.373	-2.0527	0.663503	-3.09373	0.00197654	0.0140324
YHR027C	5071.6	-2.20168	0.712183	-3.09145	0.00199182	0.0141076
YFL011W	100.79	-2.25501	0.729553	-3.09095	0.00199518	0.0141156
YOR321W	367.815	-1.92903	0.624525	-3.0888	0.00200968	0.0141865
YOR152C	371.434	-2.02396	0.656163	-3.08453	0.00203873	0.0143436
YJR091C	1943.9	-2.17574	0.705572	-3.08366	0.00204471	0.0143697
YJR085C	310.396	-1.92472	0.624304	-3.08298	0.00204936	0.0143734
YOR065W	1421.31	-2.41077	0.786561	-3.06495	0.00217705	0.0151818
YPL257W	132.772	-2.08427	0.680762	-3.06168	0.00220101	0.0153152
YKR046C	994.209	-2.02178	0.660479	-3.06108	0.00220538	0.0153287
YPR026W	7526.6	-2.05177	0.670908	-3.0582	0.00222667	0.0154259
YPL153C	560.466	-1.87196	0.612302	-3.05725	0.00223378	0.0154583
YMR152W	377.911	-1.83487	0.601039	-3.05283	0.00226693	0.0156193
YLR211C	184.837	-2.02869	0.664702	-3.05203	0.00227299	0.0156441
YLR251W	184.144	-2.31121	0.757802	-3.04989	0.00228928	0.0157221
YOR193W	531.622	-1.95408	0.640967	-3.04865	0.00229871	0.0157697
YJR156C	24.6488	-2.8984	0.953345	-3.04024	0.00236392	0.0161471
YGL124C	302.394	-1.81192	0.596147	-3.03938	0.00237065	0.0161756
YLR331C	21.0477	-3.31757	1.0923	-3.03723	0.00238763	0.0162564
YNL058C	214.115	-2.13352	0.702805	-3.03573	0.00239957	0.0163202
YBR098W	446.502	-1.78885	0.589457	-3.03474	0.00240743	0.0163561
YPL078C	635.231	-1.92725	0.636695	-3.02696	0.00247027	0.0167171
YIR017C	117.451	-2.23315	0.73851	-3.02387	0.00249568	0.0168651
YDR425W	893.433	-1.94877	0.645476	-3.01912	0.0025351	0.0171133
YPR103W	828.191	-2.18242	0.724806	-3.01104	0.00260354	0.0174666
YDR506C	512.621	-1.90103	0.631418	-3.01073	0.00260624	0.0174666
YER012W	570.579	-2.11016	0.700969	-3.01035	0.0026095	0.0174666
YDR535C	254.77	-2.16709	0.720374	-3.00828	0.00262732	0.0175673
YNL159C	452.651	-1.908	0.634356	-3.00778	0.00263165	0.0175777
YHR105W	274.96	-1.9937	0.664903	-2.99848	0.00271329	0.0180468
YNR065C	645.208	-1.84304	0.616392	-2.99005	0.00278934	0.018475
YLR218C	141.811	-2.19082	0.734846	-2.98133	0.00286997	0.0189694
YBR225W	1744.27	-1.90996	0.641011	-2.97961	0.0028862	0.0190242
YAR020C	373.912	-1.93627	0.650938	-2.97458	0.00293387	0.019291
YKL210W	3184.66	-2.00684	0.675439	-2.97117	0.00296665	0.019446
YEL030W	461.157	-1.81523	0.611312	-2.9694	0.00298382	0.0195383
YGL048C	1165.03	-2.01644	0.67921	-2.96881	0.00298956	0.0195557
YOR027W	2252.75	-2.07292	0.699041	-2.96538	0.0030231	0.0197242
YBR006W	1177.83	-2.25719	0.761941	-2.96242	0.00305228	0.0198634
YMR210W	120.634	-2.06942	0.699058	-2.96029	0.00307347	0.0199807
YDR383C	197.396	-2.22779	0.752925	-2.95885	0.00308788	0.0200193
YBR230W-A	53.2321	-2.29793	0.776635	-2.95882	0.00308816	0.0200193
YKL161C	581.424	-1.77158	0.599441	-2.95538	0.0031228	0.0202184
YDR287W	272.891	-1.85135	0.626914	-2.95312	0.00314584	0.020326
YDR100W	99.8485	-2.33332	0.790657	-2.95111	0.00316634	0.0204376
YAL005C	2128.12	-2.03721	0.691022	-2.94811	0.00319718	0.0205947
YER063W	381.936	-1.96212	0.66646	-2.94408	0.00323912	0.0207592
YER059W	486.348	-1.85205	0.630459	-2.93762	0.00330745	0.0211543
YDR388W	841.508	-1.9534	0.6665	-2.93083	0.0033806	0.0215352
YER079W	341.48	-2.02983	0.693567	-2.92665	0.00342633	0.0218011
YPL027W	18.7388	-3.08909	1.0556	-2.92639	0.00342925	0.0218011
YKL121W	488.22	-1.88833	0.645376	-2.92593	0.00343428	0.0218011
YJL026W	3869.3	-1.83996	0.628881	-2.92576	0.00343611	0.0218011
YDL124W	1479.27	-2.06501	0.706246	-2.92392	0.00345651	0.0218648
YPR127W	326.028	-2.15333	0.738271	-2.91672	0.00353731	0.0222425
YOL065C	267.281	-1.89997	0.651599	-2.91586	0.00354705	0.0222817
YER178W	977.762	-1.90808	0.655695	-2.91001	0.00361422	0.0225915
YBR223C	594.168	-1.78354	0.613215	-2.9085	0.00363164	0.022678
YCL048W-A	52.5456	-2.77242	0.953389	-2.90797	0.00363786	0.0226945
YFR024C-A	417.595	-2.00429	0.692913	-2.89255	0.00382126	0.0236291
YKL164C	3158.16	-1.8208	0.630028	-2.89003	0.00385204	0.0237239
YNL273W	531.398	-1.68264	0.582347	-2.88941	0.00385962	0.0237239
YPR015C	107.738	-1.98682	0.687651	-2.88928	0.00386124	0.0237239
YDL233W	746.599	-1.87171	0.64819	-2.8876	0.00388195	0.0237953
YHL022C	76.435	-2.02327	0.70186	-2.88272	0.00394253	0.0240734
YOL032W	63.1861	-2.20369	0.764649	-2.88196	0.0039521	0.0241086
YGR284C	442.529	-1.78166	0.618821	-2.87912	0.00398786	0.0243033
YPL006W	1278.34	-1.75427	0.609455	-2.87842	0.00399668	0.0243103
YOL114C	55.1464	-2.48791	0.865167	-2.87565	0.00403201	0.0244547
YDL046W	865.109	-1.78996	0.622689	-2.87456	0.00404589	0.0245022
YAL016W	1710.6	-1.77346	0.616977	-2.87443	0.00404758	0.0245022
YLR395C	307.385	-1.81071	0.632955	-2.86073	0.00422666	0.0252961
YCL048W	18.5869	-3.1863	1.11432	-2.85941	0.00424429	0.0253667
YGR292W	20.7009	-3.38083	1.18293	-2.85801	0.00426311	0.0254293
YDL196W	18.4205	-3.67044	1.28433	-2.85787	0.004265	0.0254293
YLR257W	2023.45	-1.90095	0.666127	-2.85374	0.00432079	0.0256653
YGL190C	2351.13	-1.89378	0.663686	-2.85343	0.00432504	0.0256665
YIR007W	283.044	-1.74845	0.616984	-2.83387	0.00459883	0.0270806
YHR195W	880.524	-1.80356	0.637024	-2.83122	0.00463703	0.0272217
YPL017C	807.237	-2.01897	0.713136	-2.83111	0.00463869	0.0272217
YNL012W	365.879	-1.99744	0.706067	-2.82897	0.00466981	0.0273283
YFL044C	202.857	-2.29023	0.810837	-2.82452	0.00473508	0.0276847
YNR064C	265.819	-1.79606	0.636109	-2.82351	0.00475006	0.0277467
YOR220W	733.236	-2.1894	0.775529	-2.82311	0.00475606	0.0277561
YHR075C	289.242	-1.80934	0.641134	-2.82209	0.00477122	0.027819
YDR003W	343.068	-1.83547	0.652841	-2.81151	0.00493088	0.0286707
YGR132C	760.032	-1.78328	0.634606	-2.81006	0.00495328	0.0287283
YER185W	149.482	-1.82176	0.649139	-2.80643	0.00500933	0.0289408
YPR149W	9045.9	-2.44533	0.873951	-2.79802	0.00514175	0.0295978
YLR337C	1397.01	-1.81839	0.651102	-2.7928	0.00522545	0.0299901
YJL214W	132.684	-2.27867	0.815971	-2.79259	0.00522885	0.0299901
YMR179W	363.282	-1.77733	0.637186	-2.78934	0.00528162	0.030238
YLR353W	263.023	-1.71205	0.61411	-2.78786	0.00530573	0.0303486
YOL071W	246.476	-1.81513	0.651323	-2.78683	0.00532267	0.030418
YDL091C	428.302	-1.88248	0.675881	-2.78522	0.00534916	0.0305143
YPR148C	982.735	-1.81738	0.652681	-2.78449	0.00536115	0.0305552
YPL152W	227.169	-1.81499	0.65281	-2.78027	0.00543138	0.0308721
YKL067W	141.751	-1.81004	0.651387	-2.77875	0.00545685	0.030989
YLR313C	196.306	-1.76044	0.633942	-2.77697	0.00548685	0.0311257
YDR479C	862.774	-1.80045	0.648565	-2.77606	0.00550226	0.0311257
YDR322C-A	235.462	-1.71146	0.617257	-2.77269	0.00555952	0.031369
YER094C	723.838	-1.83225	0.660984	-2.772	0.00557127	0.0313855
YNL208W	1098.56	-2.02466	0.731183	-2.76903	0.00562242	0.0316179
YLR038C	283.105	-1.9039	0.687573	-2.76902	0.00562251	0.0316179
YER145C-A	134.038	-1.88918	0.682448	-2.76825	0.0056359	0.031665
YML030W	172.078	-1.892	0.683703	-2.76729	0.00565252	0.0317261
YOR292C	188.782	-1.86567	0.674247	-2.76704	0.00565678	0.0317261
YER135C	38.5217	-2.25431	0.815892	-2.763	0.00572724	0.0319796
YFL030W	181.429	-1.85222	0.670621	-2.76195	0.00574566	0.0320542
YFR050C	891.104	-1.81416	0.657037	-2.76112	0.00576042	0.0321072
YLL002W	99.2726	-2.13999	0.775123	-2.76084	0.00576531	0.0321072
YBR039W	882.672	-1.74157	0.631155	-2.75935	0.00579173	0.0321978
YOR040W	382.306	-1.85114	0.67239	-2.75308	0.00590381	0.0327717
YHR194W	499.38	-1.68158	0.610897	-2.75265	0.00591156	0.0327717
YJR062C	740.432	-1.89812	0.690055	-2.75068	0.00594725	0.0329178
YEL004W	122.135	-1.8457	0.671754	-2.74759	0.00600351	0.0331423
YGL036W	3709.61	-1.72	0.626602	-2.74496	0.00605174	0.0333643
YPL156C	350.609	-1.89929	0.691952	-2.74483	0.00605427	0.0333643
YNL003C	346.413	-1.74911	0.637728	-2.74272	0.00609332	0.0335212
YOR084W	566	-1.83701	0.670894	-2.73816	0.00617849	0.0338135
YPR193C	364.64	-2.11778	0.773844	-2.73671	0.00620578	0.0339152
YLR103C	223.402	-1.70291	0.622273	-2.7366	0.00620778	0.0339152
YHR188C	674.956	-1.75052	0.639834	-2.73589	0.00622118	0.0339298
YOR132W	513.804	-1.71371	0.629018	-2.72442	0.00644154	0.034981
YLR205C	422.822	-2.12527	0.780464	-2.72309	0.00646741	0.0350914
YAR007C	655.98	-1.81845	0.667995	-2.72225	0.00648394	0.0351509
YLR093C	886.931	-1.65881	0.609747	-2.72048	0.00651865	0.0353089
YIL042C	354.033	-1.73762	0.639251	-2.71821	0.00656355	0.0355079
YDR505C	4383.12	-1.82682	0.672104	-2.71806	0.00656661	0.0355079
YJR100C	201.936	-1.66407	0.612902	-2.71507	0.00662616	0.0357801
YPR108W	1134.42	-2.05921	0.758639	-2.71435	0.00664063	0.0358164
YKL015W	4724.42	-2.03571	0.750384	-2.71289	0.00667	0.0359136
YLR148W	648.492	-1.62309	0.598801	-2.71057	0.00671676	0.0361347
YER184C	837.108	-1.69163	0.625444	-2.70468	0.006837	0.036657
YAL049C	352.895	-1.77836	0.657636	-2.70417	0.00684757	0.0366826
YLR241W	1270.15	-1.88675	0.698136	-2.70256	0.00688081	0.0368113
YHR117W	536.857	-1.7582	0.6514	-2.6991	0.00695264	0.0370147
YLR392C	413.671	-1.67484	0.620557	-2.69893	0.00695634	0.0370147
YJR128W	68.3395	-2.35991	0.876233	-2.69325	0.00707598	0.0375086
YKL096C-B	27.061	-3.00014	1.114	-2.69312	0.00707876	0.0375086
YKL197C	562.195	-1.56339	0.580701	-2.69224	0.00709737	0.0375757
YLR446W	239.865	-1.70856	0.635667	-2.68782	0.00719206	0.0380452
YCR073W-A	227.255	-1.86353	0.693528	-2.68703	0.00720912	0.0380845
YBR186W	195.178	-1.68127	0.626084	-2.68538	0.00724471	0.0382279
YKL185W	1131.34	-1.60392	0.599653	-2.67475	0.00747857	0.0392502
YDL072C	939.334	-1.86357	0.697622	-2.67131	0.00755559	0.0395716
YLR290C	261.084	-1.64349	0.615738	-2.66914	0.00760451	0.0397949
YOR288C	127.341	-1.75681	0.660035	-2.66169	0.00777492	0.0404859
YLR001C	1539.98	-1.72349	0.64765	-2.66114	0.00778766	0.0405077
YER098W	1431.25	-1.70452	0.640717	-2.66033	0.00780638	0.0405496
YPR021C	738.202	-1.58483	0.595858	-2.65975	0.0078199	0.0405533
YKL016C	559.903	-1.71213	0.647281	-2.64511	0.00816642	0.0420387
YBR038W	70.7958	-2.0678	0.782261	-2.64337	0.00820857	0.0421205
YLR267W	4227.85	-1.94095	0.735615	-2.63854	0.00832643	0.0425528
YER020W	1476.76	-1.72045	0.652905	-2.63506	0.00841216	0.0428871
YJR137C	2096.67	-1.5421	0.586254	-2.63043	0.00852765	0.0433277
YBL063W	737.716	-1.74975	0.665211	-2.63038	0.00852904	0.0433277
YPR091C	1080.81	-1.7169	0.652824	-2.62995	0.00853963	0.0433277
YDR223W	1614.99	-1.87696	0.714746	-2.62604	0.00863837	0.0436689
YBR126W-A	16.3421	-3.2813	1.25269	-2.61941	0.0088081	0.0443699
YKL194C	135.952	-1.6773	0.640562	-2.61849	0.00883206	0.0444199
YGR182C	147.032	-1.91119	0.730225	-2.61727	0.00886375	0.0445439
YLL057C	247.791	-1.9605	0.750172	-2.6134	0.00896458	0.0449436
YGR194C	304.824	-1.91909	0.737458	-2.6023	0.00926004	0.0462418
YDL147W	2826.13	-1.82505	0.701523	-2.60155	0.00928032	0.0463065
YDR059C	530.943	-1.65583	0.637307	-2.59816	0.00937245	0.0467294
YDR202C	192.744	-1.74708	0.673772	-2.59298	0.00951484	0.0473275
YDL199C	725.264	-1.87461	0.723761	-2.59009	0.00959495	0.0475811
YMR090W	456.394	-1.90576	0.736641	-2.5871	0.00967883	0.0479174
YLL046C	64.7265	-1.90707	0.737226	-2.58682	0.00968667	0.0479188
YDR359C	3988.94	-1.86971	0.72467	-2.58009	0.00987754	0.0487107
YIL169C	43.9997	-2.22242	0.861639	-2.57929	0.00990033	0.0487851
YMR029C	626.012	-1.72562	0.669614	-2.57704	0.00996508	0.0490279
YDR394W	1743.27	-1.75362	0.680576	-2.57667	0.00997569	0.049042
YIL034C	321.442	-1.71897	0.668241	-2.57238	0.0101003	0.049539
YLR219W	2072.22	-1.65174	0.642262	-2.57176	0.0101183	0.0495891
YGL188C	18.1624	-2.91369	1.13333	-2.57091	0.0101431	0.0496722
YER111C	1027.59	-1.54656	0.604297	-2.55927	0.0104892	0.0511502
YGR149W	730.853	-1.56589	0.611884	-2.55913	0.0104934	0.0511502
YOR376W-A	139.655	-1.88422	0.737725	-2.55409	0.0106465	0.051817
YDL137W	1046.57	-1.53824	0.602544	-2.55291	0.0106827	0.0519085
YKL013C	622.141	-1.65767	0.649879	-2.55073	0.0107496	0.0520786
YLR347W-A	35.1592	-2.27879	0.89371	-2.54981	0.0107781	0.0521442
YOR070C	1397.35	-1.68721	0.661714	-2.54976	0.0107796	0.0521442
YJR115W	69.7054	-1.91163	0.75056	-2.54695	0.010867	0.0524078
YDR048C	13.4947	-3.09068	1.21929	-2.53482	0.0112504	0.0538862
YBR150C	3725.56	-1.63066	0.643865	-2.5326	0.0113219	0.0541875
YBR151W	531.507	-1.64714	0.650856	-2.53073	0.0113826	0.0544369
YML049C	2181.47	-1.65988	0.656071	-2.53003	0.0114054	0.054505
YHL010C	1027.31	-1.48918	0.589471	-2.52631	0.0115269	0.0549183
YDL188C	529.844	-1.54343	0.611005	-2.52605	0.0115353	0.0549183
YIL059C	145.217	-1.77403	0.702545	-2.52515	0.011565	0.0549361
YDR107C	356.048	-1.54012	0.61075	-2.52169	0.0116793	0.0553957
YNL257C	563.769	-1.57376	0.62448	-2.52011	0.011732	0.0555624
YGL160W	474.09	-1.49247	0.593111	-2.51635	0.0118577	0.0561159
YCR083W	183.111	-1.69069	0.67214	-2.51538	0.0118903	0.056191
YLL007C	346.317	-1.55857	0.62027	-2.51274	0.0119799	0.0565674
YFR019W	2149.76	-1.5004	0.598215	-2.50813	0.0121373	0.0570976
YPL256C	38.5444	-2.06597	0.824647	-2.50528	0.0122353	0.0574734
YGL237C	341.274	-1.64795	0.658252	-2.50352	0.0122964	0.0576617
YGR032W	15638.3	-1.53967	0.615438	-2.50174	0.0123583	0.0578793
YOR036W	1120.74	-1.94984	0.779814	-2.50039	0.0124056	0.058015
YBL001C	309.43	-1.69019	0.67824	-2.49203	0.0127017	0.059181
YLR240W	466.656	-1.58372	0.635906	-2.49049	0.0127567	0.0593938
YGR157W	2749.32	-1.51509	0.608496	-2.4899	0.012778	0.0594444
YKR017C	503.987	-1.63548	0.656988	-2.48936	0.0127974	0.0594522
YDR003W-A	90.1673	-1.84122	0.740444	-2.48665	0.0128952	0.0598626
YPR135W	458.059	-1.45187	0.585433	-2.48	0.0131384	0.0606358
YBR043C	1684.89	-1.63665	0.661273	-2.47499	0.0133239	0.0612685
YGL191W	574.717	-1.59466	0.644814	-2.47305	0.0133967	0.0615587
YLR381W	484.126	-1.51476	0.613073	-2.47076	0.0134825	0.0617606
YDR356W	756.322	-1.65573	0.670178	-2.47058	0.0134894	0.0617606
YLR417W	651.894	-1.66867	0.676157	-2.46788	0.0135918	0.0621843
YER144C	3564.64	-1.5858	0.64468	-2.45983	0.0139003	0.0632761
YCR076C	161.088	-1.57258	0.63952	-2.459	0.0139324	0.0633708
YMR056C	505.124	-1.43897	0.585237	-2.45878	0.0139412	0.0633708
YIL105C	1762.86	-1.64157	0.66832	-2.45626	0.0140392	0.0636793
YPL070W	1120.52	-1.64099	0.668395	-2.45512	0.0140838	0.0637445
YHR174W	578.897	-1.53725	0.626908	-2.45212	0.0142019	0.0641873
YIL037C	113.305	-1.72691	0.705408	-2.4481	0.0143614	0.0647233
YOR377W	656.479	-1.67315	0.684029	-2.44602	0.0144442	0.0648655
YPR155C	317.969	-1.65707	0.67843	-2.44251	0.0145856	0.0651847
YBR056W-A	1108.52	-2.16621	0.887047	-2.44205	0.0146043	0.0651847
YBR140C	7219.02	-1.50865	0.617839	-2.44183	0.0146132	0.0651847
YJL132W	677.082	-1.52469	0.624412	-2.44179	0.0146145	0.0651847
YNL026W	242.097	-1.74582	0.715216	-2.44097	0.0146479	0.0652714
YDL142C	141.84	-1.69293	0.694134	-2.43891	0.0147315	0.0655268
YEL070W	291.173	-2.02519	0.831045	-2.43692	0.0148131	0.0657298
YIL036W	2676.96	-1.70705	0.70181	-2.43235	0.015001	0.0663777
YIL077C	583.494	-1.52077	0.626902	-2.42584	0.0152728	0.0674122
YIR039C	108.18	-1.89206	0.781012	-2.42257	0.015411	0.0677657
YIR041W	24.7172	-2.5025	1.03588	-2.41582	0.0157	0.0685604
YPL196W	129.325	-1.74562	0.722717	-2.41536	0.0157199	0.0685997
YPL110C	1567.55	-1.42183	0.589674	-2.41121	0.0158997	0.0692112
YHR001W	417.259	-1.48403	0.615496	-2.41112	0.0159037	0.0692112
YDR119W-A	494.364	-1.55452	0.644962	-2.41025	0.0159414	0.0692801
YFR045W	178.6	-1.5109	0.627747	-2.40687	0.0160901	0.0698303
YBR169C	2241.4	-1.65677	0.688567	-2.40612	0.0161231	0.0699255
YGL173C	6152.67	-1.63613	0.680058	-2.40586	0.0161343	0.0699263
YER048W-A	720.785	-1.4991	0.623362	-2.40487	0.0161784	0.0700695
YKL133C	473.107	-1.53036	0.636573	-2.40406	0.0162143	0.0701771
YLR399C	4582.15	-1.93044	0.803357	-2.40296	0.0162628	0.0703386
YPR105C	915.879	-1.4009	0.583437	-2.40112	0.0163449	0.0705559
YGR131W	50.1649	-1.82094	0.75838	-2.40109	0.0163464	0.0705559
YOR074C	103.705	-1.5991	0.666756	-2.39833	0.01647	0.0710407
YIL067C	446.389	-1.4052	0.586164	-2.39729	0.0165168	0.0711944
YOR298C-A	859.05	-1.58879	0.662947	-2.39656	0.0165498	0.0712768
YDL237W	203.4	-1.56789	0.654892	-2.39413	0.01666	0.0716167
YCR088W	327.3	-1.51537	0.633888	-2.39059	0.0168214	0.0721144
YDL214C	1602.39	-1.71838	0.719449	-2.38847	0.0169188	0.0723849
YJR035W	890.253	-1.36489	0.571929	-2.38647	0.0170108	0.0727037
YOL090W	700.296	-1.37147	0.574774	-2.38611	0.0170277	0.0727037
YAL010C	401.478	-1.56058	0.654751	-2.38347	0.0171501	0.073177
YMR041C	217.79	-1.52237	0.639139	-2.38191	0.0172231	0.0733896
YDR371W	305.383	-1.41289	0.595177	-2.3739	0.0176015	0.0748258
YMR154C	314.339	-1.44375	0.608592	-2.37229	0.0176784	0.0750265
YGR025W	21.6818	-2.75803	1.1637	-2.37006	0.0177853	0.0753354
YPL251W	11.0469	-3.06201	1.29213	-2.36975	0.0178001	0.0753369
YNL100W	347.799	-1.65855	0.700049	-2.36919	0.0178271	0.0753544
YMR315W-A	87.1248	-1.88274	0.797319	-2.36134	0.0182092	0.0764595
YDR200C	812.207	-1.50952	0.639442	-2.36069	0.018241	0.0765419
YMR186W	3613.18	-1.64866	0.698977	-2.35868	0.0183401	0.0768753
YOR103C	249.589	-1.44552	0.612877	-2.35859	0.0183447	0.0768753
YGL248W	1425.98	-1.34433	0.571047	-2.35415	0.0185652	0.0776453
YML034W	1341.22	-1.42621	0.606324	-2.35222	0.0186619	0.0779982
YHR190W	962.601	-1.84045	0.783452	-2.34916	0.0188158	0.0785377
YDL076C	399.656	-1.43792	0.612952	-2.3459	0.0189814	0.0790205
YDL090C	214.473	-1.44678	0.617173	-2.34421	0.0190675	0.0791856
YLR423C	199.749	-1.46546	0.625409	-2.34321	0.0191185	0.0792786
YHL018W	75.1568	-1.63021	0.695855	-2.34274	0.0191426	0.0793265
YKL157W	2093.79	-1.50151	0.641183	-2.34179	0.0191915	0.0793364
YFL024C	5673.21	-1.92963	0.825247	-2.33825	0.0193743	0.0797649
YPL015C	826.668	-1.62073	0.693612	-2.33665	0.0194571	0.0800017
YHR037W	1118.6	-1.72714	0.739428	-2.33579	0.0195024	0.0801356
YOR219C	1610.46	-1.50669	0.6458	-2.33305	0.0196454	0.0805663
YBL007C	2919.24	-1.54541	0.662544	-2.33253	0.0196726	0.0806259
YLR072W	563.755	-1.42884	0.612926	-2.33117	0.0197443	0.0808268
YER021W	1998.57	-1.64346	0.705285	-2.33021	0.0197953	0.0809193
YBL098W	310.371	-1.64068	0.70429	-2.32956	0.0198296	0.0809547
YIR017W-A	20.9574	-2.52767	1.0862	-2.32707	0.0199615	0.0813017
YIL071W-A	30.5347	-2.29218	0.98528	-2.32643	0.0199958	0.0813189
YDR224C	1139.41	-1.55724	0.670402	-2.32284	0.0201877	0.0819938
YGR225W	387.765	-1.51199	0.651479	-2.32086	0.0202943	0.0822158
YLR152C	2305.11	-1.31276	0.566293	-2.31816	0.0204405	0.0825967
YLR260W	529.364	-1.44669	0.624315	-2.31725	0.0204901	0.0827447
YMR289W	193.495	-1.46513	0.632586	-2.31609	0.0205532	0.0828377
YDR524W-C	3.78457	-5.70696	2.46675	-2.31356	0.0206919	0.0830826
YKR050W	1292.06	-1.39966	0.605237	-2.31259	0.0207454	0.0832371
YOR223W	230.551	-1.48189	0.641696	-2.30934	0.0209249	0.0835413
YOR181W	589.667	-1.5427	0.669017	-2.30592	0.0211152	0.0841421
YEL013W	1381.66	-1.42856	0.619902	-2.30449	0.0211951	0.0844073
YOL060C	1882.17	-1.54239	0.670315	-2.30099	0.0213921	0.0850847
YKL140W	285.394	-1.44176	0.626841	-2.30004	0.021446	0.0851921
YKL189W	658.13	-1.56284	0.68054	-2.29647	0.0216489	0.0857827
YJL005W	3811.05	-1.39841	0.609015	-2.29618	0.0216656	0.0857954
YOR175C	768.212	-1.46307	0.638075	-2.29295	0.0218509	0.0863131
YPR003C	1163.6	-1.42355	0.62095	-2.29253	0.021875	0.0863258
YDL025C	1650.42	-1.47865	0.645018	-2.29242	0.0218814	0.0863258
YLR032W	1246.55	-1.30243	0.568842	-2.28962	0.0220432	0.0865866
YLR120C	6530.77	-1.67916	0.733599	-2.28894	0.022083	0.0866096
YLR189C	1945.87	-1.45157	0.634248	-2.28866	0.0220993	0.0866096
YNL212W	2097.23	-1.35518	0.5923	-2.288	0.0221374	0.0866341
YML047W-A	26.6075	-2.26257	0.989322	-2.28699	0.0221963	0.086704
YAL031C	919.588	-1.54661	0.676845	-2.28503	0.0223112	0.0869918
YHR047C	864.92	-1.33623	0.585552	-2.28201	0.022489	0.0875771
YKL145W	1523.89	-1.63622	0.71741	-2.28073	0.0225644	0.0878167
YJR126C	1522.06	-1.47179	0.645575	-2.27982	0.0226186	0.0879737
YNL294C	948.891	-1.32413	0.581584	-2.27676	0.0228007	0.0886273
YPR047W	53.9342	-1.75964	0.7732	-2.27579	0.0228587	0.088771
YBR020W	367.934	-1.42236	0.625386	-2.27437	0.0229436	0.0889643
YNL293W	891.912	-1.37282	0.604363	-2.27151	0.023116	0.089578
YGL259W	9.56889	-3.18593	1.40301	-2.27079	0.0231596	0.0896796
YDL216C	325.565	-1.43314	0.631235	-2.27038	0.0231847	0.0896796
YGR223C	617.744	-1.41962	0.626201	-2.26704	0.0233879	0.090245
YGR112W	285.681	-1.42721	0.630298	-2.26434	0.0235531	0.0907168
YDR381W	8314.92	-1.58924	0.702798	-2.2613	0.0237407	0.0912172
YDR461C-A	151.99	-1.53108	0.677481	-2.25996	0.0238236	0.0914247
YBR071W	1598.57	-1.53403	0.679056	-2.25907	0.0238791	0.0915824
YGR070W	1527.64	-1.61664	0.717088	-2.25445	0.0241676	0.0925206
YIL100W	26.109	-2.14995	0.955655	-2.24971	0.0244672	0.0934416
YOR022C	290.324	-1.38922	0.617602	-2.24937	0.0244887	0.0934676
YPL057C	7816.34	-1.39805	0.622002	-2.24767	0.0245974	0.0936566
YMR232W	326.013	-1.57631	0.701436	-2.24726	0.0246234	0.0936991
YGL073W	1823.81	-1.5109	0.672591	-2.24638	0.0246796	0.0938103
YBL106C	611.087	-1.55077	0.690354	-2.24634	0.0246822	0.0938103
YBL022C	2974.3	-1.61903	0.72296	-2.23945	0.0251269	0.0950276
YDL097C	1469.02	-1.56711	0.699828	-2.23928	0.0251376	0.0950276
YJR117W	1053.04	-1.3428	0.599946	-2.23821	0.0252076	0.0952353
YOR035C	2304.07	-1.62296	0.725614	-2.23668	0.0253076	0.0955561
YER004W	677.013	-1.33784	0.598873	-2.23393	0.0254876	0.0961299
YPL016W	9067.15	-1.61219	0.721694	-2.2339	0.0254899	0.0961299
YMR030W	434.137	-1.3964	0.62606	-2.23046	0.0257172	0.0968898
YML099W-A	6.85698	-5.10787	2.29013	-2.23038	0.025722	0.0968898
YKL017C	273.006	-1.44783	0.649441	-2.22935	0.0257906	0.0970906
YKR076W	675.919	-1.64504	0.738588	-2.22728	0.0259288	0.0973828
YAL055W	113.646	-1.57172	0.705682	-2.22723	0.0259316	0.0973828
YNL280C	580.916	-1.43022	0.642274	-2.2268	0.0259605	0.0973828
YBR004C	1787.39	-1.32457	0.595813	-2.22313	0.0262071	0.0980753
YOR034C-A	105.461	-1.74126	0.78364	-2.22202	0.026282	0.0982976
YOR238W	287.178	-1.42805	0.642757	-2.22176	0.0262995	0.0983048
YCL034W	379.849	-1.38787	0.624959	-2.22073	0.0263694	0.0984939
YKR031C	3170.94	-1.53058	0.689279	-2.22055	0.0263812	0.0984939
YGR167W	494.459	-1.50152	0.677525	-2.21619	0.0266785	0.0994279
YLR117C	1634.75	-1.37819	0.623308	-2.21109	0.0270298	0.100251
YJL152W	17.1364	-2.39791	1.08458	-2.21091	0.0270418	0.100251
YJL059W	223.919	-1.51829	0.686975	-2.21011	0.0270974	0.100398
YNL192W	11579.6	-1.57155	0.711306	-2.20939	0.0271479	0.100409
YBR199W	1500.29	-1.44127	0.653553	-2.20528	0.0274342	0.101281
YHL048W	573.723	-1.53714	0.69728	-2.20448	0.0274905	0.101281
YMR311C	852.136	-1.4554	0.660924	-2.20207	0.0276604	0.101652
YKL124W	781.352	-1.37473	0.62482	-2.2002	0.0277928	0.102079
YOR097C	259.989	-1.4986	0.681214	-2.1999	0.0278138	0.102097
YBL030C	1977.34	-1.30711	0.594443	-2.19889	0.0278857	0.102212
YDL104C	108.194	-1.45803	0.663094	-2.19883	0.0278902	0.102212
YBL037W	1145.79	-1.26789	0.579389	-2.18831	0.0286467	0.104248
YDR214W	335.56	-1.34381	0.614789	-2.18581	0.0288294	0.104612
YML072C	4618.56	-1.53139	0.700902	-2.18488	0.0288974	0.104739
YNL031C	1774.75	-1.59924	0.732873	-2.18216	0.0290979	0.105284
YPR050C	82.7417	-1.67411	0.767461	-2.18137	0.0291564	0.105436
YMR054W	2154.49	-1.30722	0.600229	-2.17786	0.0294162	0.105986
YDR531W	171.857	-1.3852	0.636296	-2.17697	0.0294828	0.106131
YDR334W	5762.78	-1.43188	0.658229	-2.17535	0.0296039	0.106446
YBR295W	2123.68	-1.25513	0.577107	-2.17486	0.0296405	0.106517
YGL082W	384.023	-1.3694	0.63002	-2.17358	0.0297368	0.106803
YFR004W	1392.77	-1.45535	0.670347	-2.17104	0.029928	0.107428
YOL085W-A	13.5528	-2.55335	1.17754	-2.16838	0.0301298	0.107916
YML101C	40.9163	-1.81229	0.835964	-2.1679	0.0301661	0.107916
YML017W	1489.17	-1.29289	0.596454	-2.16763	0.0301868	0.107929
YNL307C	807.87	-1.30016	0.599926	-2.1672	0.0302193	0.107966
YKL218C	98.6329	-1.53543	0.709528	-2.16402	0.0304629	0.108607
YGL242C	84.0122	-1.47827	0.683179	-2.16381	0.0304792	0.108607
YDR073W	742.476	-1.36348	0.630466	-2.16265	0.0305679	0.108862
YHR171W	785.419	-1.45372	0.672463	-2.16179	0.0306345	0.109038
YGR190C	32.2901	-2.12019	0.981393	-2.16039	0.0307422	0.109238
YEL077C	440.662	-1.34265	0.622288	-2.1576	0.0309586	0.109698
YFR010W	678.895	-1.52113	0.706755	-2.15227	0.0313764	0.110806
YMR120C	375.431	-1.36619	0.635375	-2.15021	0.031539	0.111318
YGL088W	1318.52	-1.39054	0.650425	-2.13789	0.0325257	0.114165
YLL039C	9032.54	-1.46888	0.688548	-2.1333	0.0329003	0.115287
YLL047W	79.1511	-1.68668	0.790805	-2.13286	0.0329364	0.11535
YPL141C	1482.68	-1.36504	0.641205	-2.12887	0.0332651	0.115861
YPL118W	661.978	-1.34026	0.629667	-2.12852	0.0332941	0.115898
YNL196C	140.816	-1.80134	0.847208	-2.1262	0.0334863	0.116503
YBR204C	239.149	-1.33335	0.627917	-2.12346	0.0337157	0.116987
YLR324W	770.018	-1.2616	0.59487	-2.1208	0.0339387	0.117503
YOL082W	625.678	-1.37798	0.649752	-2.12077	0.0339409	0.117503
YLR136C	176.676	-1.47565	0.697002	-2.11714	0.0342483	0.118313
YGL170C	51.1383	-1.77986	0.842447	-2.11273	0.0346241	0.119347
YMR165C	1109.74	-1.37493	0.65227	-2.10792	0.0350382	0.120446
YKL127W	80.2257	-1.54147	0.731718	-2.10665	0.0351482	0.120563
YPL100W	647.291	-1.34466	0.638503	-2.10596	0.0352081	0.120683
YCL064C	674.35	-2.34221	1.11226	-2.1058	0.0352214	0.120683
YLR370C	419.765	-1.29904	0.618164	-2.10146	0.035601	0.121682
YJR110W	875.154	-1.27379	0.606701	-2.09953	0.0357699	0.122098
YOR023C	2831.32	-1.43949	0.685939	-2.09857	0.0358552	0.122259
YOR259C	1691.63	-1.47907	0.704888	-2.09831	0.0358776	0.12227
YDL115C	690.8	-1.31159	0.625284	-2.09759	0.035941	0.122328
YER027C	523.972	-1.29475	0.617566	-2.09653	0.0360349	0.122476
YDR262W	1206.22	-1.22481	0.584586	-2.09517	0.0361556	0.122755
YMR072W	553.18	-1.26071	0.601919	-2.09448	0.0362169	0.122897
YGL241W	632.96	-1.26649	0.605188	-2.09273	0.0363735	0.123296
YLR053C	43.7256	-1.70208	0.815362	-2.08752	0.0368415	0.124749
YDR504C	460.493	-1.42638	0.683941	-2.08553	0.0370216	0.125024
YML013W	643.039	-1.4144	0.678804	-2.08366	0.0371908	0.125395
YGR232W	209.965	-1.30923	0.629462	-2.07993	0.0375322	0.126277
YJL205C	185.724	-1.34758	0.648885	-2.07676	0.0378241	0.127071
YOL017W	104.827	-1.46162	0.704481	-2.07475	0.0380094	0.127544
YLR011W	43.7994	-1.65845	0.799661	-2.07395	0.0380842	0.127727
YJL099W	357.101	-1.28643	0.620381	-2.07361	0.0381155	0.127764
YGR295C	1339.22	-1.35419	0.653666	-2.07169	0.0382948	0.128185
YMR197C	1010.07	-1.25619	0.606384	-2.07161	0.0383017	0.128185
YDR215C	10.0106	-2.8984	1.39988	-2.07046	0.0384092	0.128475
YML118W	459.2	-1.27966	0.618117	-2.07025	0.0384287	0.128475
YMR004W	480.862	-1.29582	0.626279	-2.06907	0.0385396	0.128718
YIL068C	848.032	-1.31936	0.637751	-2.06878	0.0385672	0.128733
YOR386W	89.4096	-1.63327	0.792039	-2.0621	0.039198	0.130221
YJR004C	383.743	-1.23268	0.59803	-2.06124	0.0392804	0.130402
YLR429W	1333.61	-1.22301	0.593574	-2.06041	0.0393589	0.130482
YPR007C	143.88	-1.45539	0.707229	-2.05788	0.0396016	0.131081
YOL019W	1532.15	-1.24882	0.607289	-2.05639	0.0397449	0.131486
YIR006C	2337.42	-1.32308	0.64373	-2.05533	0.039847	0.131686
YLR346C	62.6065	-1.87506	0.91427	-2.05088	0.0402785	0.132904
YHR114W	517.138	-1.29182	0.632415	-2.04268	0.0410844	0.135015
YML057W	924.91	-1.36515	0.668705	-2.04148	0.0412031	0.135247
YHR043C	41.1213	-1.84541	0.9041	-2.04115	0.0412356	0.135247
YLR234W	365.517	-1.26285	0.619471	-2.0386	0.0414899	0.135904
YLL001W	1309.06	-1.32452	0.649852	-2.03819	0.041531	0.135904
YPL007C	236.035	-1.31752	0.646784	-2.03704	0.0416464	0.136195
YOL057W	605.496	-1.26387	0.620496	-2.03687	0.0416628	0.136195
YMR151W	57.725	-1.57294	0.772944	-2.035	0.0418512	0.1366
YGR107W	18.819	-2.07369	1.01912	-2.03478	0.0418732	0.1366
YDR315C	284.696	-1.23125	0.60535	-2.03394	0.0419576	0.136792
YJR098C	159.209	-1.35373	0.665721	-2.03349	0.0420035	0.136792
YDR084C	153.565	-1.32826	0.653236	-2.03336	0.0420164	0.136792
YGL084C	596.835	-1.21855	0.599323	-2.03321	0.0420314	0.136792
YDR407C	1359.53	-1.31271	0.64566	-2.03312	0.0420399	0.136792
YER170W	62.8518	-1.51348	0.747216	-2.02549	0.0428167	0.139105
YGL154C	158.776	-1.28906	0.636881	-2.02402	0.0429677	0.139381
YIL026C	973.902	-1.32662	0.656106	-2.02196	0.04318	0.139855
YDR111C	4527.68	-1.22125	0.604231	-2.02116	0.0432631	0.140052
YBR089C-A	97.8073	-1.48995	0.737564	-2.0201	0.0433734	0.14007
YIL157C	178.993	-1.27847	0.633044	-2.01957	0.0434283	0.14007
YBR235W	1231.17	-1.17751	0.583214	-2.019	0.0434869	0.14007
YOR187W	1489.6	-1.21407	0.601392	-2.01877	0.043511	0.14007
YPL134C	313.106	-1.25648	0.622401	-2.01876	0.043512	0.14007
YGL011C	1117.97	-1.36794	0.678442	-2.01629	0.0437693	0.140684
YPL167C	1734.89	-1.23229	0.611667	-2.01464	0.043942	0.141024
YOR214C	38.5541	-1.72472	0.856923	-2.01269	0.0441473	0.141443
YBR221C	679.335	-1.34216	0.667317	-2.01128	0.0442962	0.14157
YBR170C	1300.44	-1.28578	0.640104	-2.00871	0.0445683	0.14217
YHR104W	269.972	-1.33048	0.662617	-2.00791	0.0446526	0.142223
YDL023C	6.10336	-3.85594	1.92217	-2.00603	0.0448528	0.142789
YLR124W	64.4569	-1.74115	0.869745	-2.00191	0.0452947	0.143979
YDR305C	129.719	-1.39119	0.695386	-2.0006	0.045436	0.144306
YJR131W	542.642	-1.15795	0.578861	-2.00039	0.0454582	0.144306
YLR422W	2621.11	-1.29862	0.649457	-1.99954	0.0455497	0.1445
YJL173C	167.093	-1.29091	0.645894	-1.99863	0.0456479	0.144681
YCL033C	47.8813	-1.61986	0.8105	-1.99859	0.0456528	0.144681
YBR203W	5223.03	-1.25423	0.628532	-1.99549	0.0459898	0.145386
YOR054C	2584.5	-1.29394	0.648725	-1.9946	0.0460869	0.14562
YGR068W-A	5.76964	-3.7693	1.89047	-1.99385	0.0461689	0.145806
YDL220C	481.699	-1.17534	0.590269	-1.9912	0.0464594	0.146359
YGL035C	1384.94	-1.13448	0.570116	-1.9899	0.0466015	0.146733
YKL148C	2146.36	-1.21086	0.609248	-1.98746	0.0468711	0.147436
YDL161W	551.187	-1.34673	0.678049	-1.98618	0.0470133	0.147736
YPL096W	236.671	-1.20911	0.609083	-1.98514	0.0471293	0.148027
YNL242W	2214.43	-1.21365	0.612178	-1.98251	0.0474226	0.148653
YGR141W	452.21	-1.20736	0.609921	-1.97954	0.0477552	0.149594
YGL087C	154.306	-1.35136	0.682708	-1.97941	0.0477698	0.149594
YJR001W	351.655	-1.3677	0.691265	-1.97855	0.0478671	0.149708
YKL215C	727.244	-1.15758	0.585092	-1.97846	0.0478774	0.149708
YPL170W	496.253	-1.15335	0.58432	-1.97384	0.0484004	0.150971
YDL146W	246.748	-1.22662	0.622768	-1.96963	0.0488808	0.15217
YBL041W	720.217	-1.41067	0.716635	-1.96847	0.0490141	0.15251
YNL165W	474.974	-1.19052	0.60495	-1.96797	0.0490717	0.152614
YNL243W	2154.16	-1.19098	0.605621	-1.96654	0.0492363	0.153051
YBL034C	1843.42	-1.22514	0.625909	-1.95738	0.0503032	0.155562
YIL071C	475.805	-1.15859	0.592353	-1.95592	0.0504751	0.155944
YLR216C	292.04	-1.16952	0.597973	-1.95581	0.0504873	0.155944
YHR112C	381.653	-1.23473	0.631598	-1.95493	0.0505911	0.156189
YCL061C	773.817	-1.19534	0.611735	-1.95401	0.0506996	0.156447
YDR176W	1172.95	-1.35327	0.69278	-1.95339	0.050773	0.156597
YLR283W	200.112	-1.22335	0.626664	-1.95216	0.0509196	0.156897
YEL005C	291.224	-1.30101	0.666779	-1.95119	0.0510344	0.157174
YNL321W	1775.98	-1.22252	0.626858	-1.95024	0.0511474	0.157445
YPL249C	450.772	-1.20678	0.619178	-1.949	0.0512949	0.157746
YJR157W	13.5094	-2.32706	1.19622	-1.94534	0.0517346	0.158867
YHR116W	260.701	-1.28049	0.658502	-1.94455	0.0518289	0.159002
YJL217W	166.389	-1.25687	0.64668	-1.94357	0.0519472	0.159195
YDR427W	1533.13	-1.34473	0.693021	-1.94038	0.0523332	0.160161
YLR207W	779.763	-1.21331	0.625776	-1.93888	0.0525153	0.160641
YKR065C	235.07	-1.18182	0.609663	-1.93848	0.0525651	0.160716
YJL216C	98.5274	-1.65657	0.855187	-1.93708	0.0527351	0.161108
YMR087W	142.352	-1.32827	0.685735	-1.93701	0.0527441	0.161108
YOL049W	344.677	-1.16564	0.602848	-1.93356	0.0531675	0.162244
YHR055C	4.25581	-4.32548	2.24271	-1.92868	0.0537706	0.163582
YBR044C	504.848	-1.16395	0.603959	-1.92721	0.0539537	0.163929
YHR086W	654.975	-1.1684	0.606555	-1.92628	0.0540691	0.163986
YDL020C	6623.78	-1.17564	0.610879	-1.9245	0.0542916	0.164399
YLR421C	432.594	-1.27994	0.665885	-1.92217	0.0545848	0.164911
YLR374C	8.62864	-2.65481	1.38118	-1.92214	0.0545884	0.164911
YDL077C	467.378	-1.14961	0.598554	-1.92065	0.0547754	0.165306
YNL239W	1217.39	-1.21634	0.633732	-1.91933	0.0549426	0.16546
YML116W-A	23.9603	-2.03204	1.05966	-1.91763	0.0551585	0.165921
YFL036W	3564.75	-1.1059	0.57733	-1.91554	0.0554234	0.166199
YDL070W	9454.75	-1.54821	0.80827	-1.91546	0.0554332	0.166199
YJL075C	10.5762	-2.71698	1.41864	-1.9152	0.055467	0.166199
YLL006W	233.457	-1.1745	0.614497	-1.91132	0.0559628	0.167149
YMR109W	1611.13	-1.19489	0.626278	-1.90792	0.0564019	0.168298
YMR238W	4365.35	-1.14807	0.601803	-1.90772	0.0564272	0.168298
YHL008C	254.329	-1.25657	0.658904	-1.90706	0.0565125	0.168473
YKL066W	28.1077	-1.71461	0.899591	-1.90599	0.0566519	0.16873
YLR165C	176.084	-1.17961	0.620181	-1.90204	0.057166	0.169782
YIR001C	495.793	-1.13866	0.598839	-1.90144	0.0572443	0.169935
YPL164C	999.374	-1.17404	0.617693	-1.90069	0.0573427	0.170147
YOL117W	355.345	-1.18131	0.622344	-1.89816	0.0576748	0.171052
YBR111C	275.878	-1.23544	0.651043	-1.89763	0.0577451	0.171113
YDR253C	86.3036	-1.33905	0.705658	-1.8976	0.0577492	0.171113
YBR016W	664.658	-1.39342	0.734567	-1.89693	0.0578369	0.171146
YLL027W	1065.72	-1.11192	0.586177	-1.8969	0.0578416	0.171146
YLR450W	2065.77	-1.23814	0.652832	-1.89657	0.0578847	0.171194
YPL014W	431.544	-1.39937	0.738479	-1.89494	0.0581006	0.171752
YLR097C	311.284	-1.15001	0.608091	-1.89118	0.0586002	0.172745
YLR206W	1656.52	-1.20811	0.640197	-1.88709	0.0591477	0.173807
YOL155C	78.2812	-1.98269	1.05071	-1.88701	0.0591592	0.173807
YBR285W	178.626	-5.22121	2.7687	-1.8858	0.0593222	0.174063
YIL098C	91.4955	-1.31092	0.695903	-1.88376	0.059597	0.174569
YDL200C	367.609	-1.12434	0.597431	-1.88195	0.0598424	0.174969
YHR132W-A	285.645	-1.1806	0.627353	-1.88188	0.0598521	0.174969
YCR082W	493.664	-1.13503	0.604537	-1.87752	0.0604471	0.176424
YMR026C	302.382	-1.1813	0.629487	-1.87661	0.0605717	0.176665
YKL064W	3772	-1.13463	0.605112	-1.87507	0.060783	0.1772
YJL042W	3436.79	-1.10944	0.591966	-1.87417	0.0609077	0.177408
YHR002W	559.191	-1.1122	0.593533	-1.87386	0.0609501	0.177442
YML086C	708.023	-1.15514	0.616597	-1.87341	0.0610113	0.177457
YDR129C	1665.78	-1.19675	0.639208	-1.87223	0.0611744	0.177849
YML007W	4949.97	-1.24258	0.66426	-1.87062	0.0613981	0.178271
YLR024C	2670.76	-1.34298	0.717948	-1.87058	0.0614038	0.178271
YLR348C	144.005	-1.21736	0.65129	-1.86916	0.0616006	0.178515
YGL049C	1287.3	-1.08995	0.583707	-1.86729	0.0618605	0.178915
YBR108W	905.233	-1.07361	0.575	-1.86715	0.0618801	0.178915
YIL088C	446.759	-1.22524	0.656315	-1.86684	0.0619237	0.178927
YGR059W	67.4455	-1.45232	0.778457	-1.86565	0.062091	0.17928
YLL024C	488.709	-1.23699	0.663655	-1.8639	0.0623359	0.179823
YPL084W	1173.24	-1.17719	0.631871	-1.86302	0.0624598	0.180016
YOR221C	616.655	-1.19838	0.645047	-1.85782	0.0631948	0.181391
YLR362W	827.337	-1.10384	0.594998	-1.8552	0.0635673	0.182191
YBL091C-A	117.113	-1.29551	0.698492	-1.85472	0.0636358	0.182244
YGR111W	310.308	-1.10633	0.59696	-1.85328	0.0638425	0.182671
YIL031W	2912.02	-1.20686	0.65144	-1.8526	0.0639397	0.182757
YKL106W	1486.04	-1.09662	0.592333	-1.85136	0.0641174	0.183127
YPL162C	494.61	-1.08141	0.584318	-1.85072	0.0642101	0.183224
YDL103C	348.064	-1.15047	0.62237	-1.84853	0.0645261	0.183879
YEL025C	1170.14	-1.12067	0.60665	-1.84731	0.0647026	0.184172
YDL242W	27.1965	-1.81888	0.984663	-1.84721	0.0647163	0.184172
YPR185W	1214.54	-1.15826	0.628193	-1.8438	0.0652127	0.185502
YNL051W	422.497	-1.20794	0.656149	-1.84095	0.0656283	0.186266
YNR035C	420.303	-1.20097	0.652614	-1.84025	0.0657318	0.186476
YKR075C	650.682	-1.71995	0.935398	-1.83874	0.0659538	0.186854
YJR161C	174.935	-1.41734	0.771125	-1.83801	0.0660607	0.187074
YAL037C-B	15.4126	-2.17407	1.18325	-1.83737	0.0661556	0.187175
YKL146W	1653.37	-1.06596	0.581183	-1.83411	0.0666374	0.188286
YPR042C	2535.76	-1.13973	0.621965	-1.83246	0.0668829	0.188811
YMR189W	1975.14	-1.40141	0.765377	-1.831	0.0671001	0.189171
YGR199W	589.458	-1.26913	0.693995	-1.82873	0.0674397	0.189721
YML109W	782.362	-1.07857	0.589805	-1.8287	0.067445	0.189721
YEL058W	1086.52	-1.04863	0.57384	-1.8274	0.0676403	0.190095
YBR041W	1399.08	-1.06488	0.58288	-1.82693	0.0677103	0.190095
YMR163C	335.459	-1.09258	0.598127	-1.82666	0.0677502	0.190095
YOL016C	1028.31	-1.57914	0.865838	-1.82383	0.0681772	0.191017
YBL113C	327.611	-1.12432	0.617289	-1.82138	0.0685492	0.191791
YDR421W	813.625	-1.06621	0.585436	-1.82122	0.0685729	0.191791
YMR302C	1332.36	-1.10029	0.604674	-1.81965	0.0688128	0.192372
YNL126W	622.672	-1.13113	0.62189	-1.81886	0.0689335	0.192624
YIL140W	275.938	-1.13592	0.625196	-1.81691	0.0692313	0.193371
YOL088C	365.719	-1.12612	0.620002	-1.81631	0.0693221	0.193529
YIR020C	63.0031	-1.36943	0.755234	-1.81326	0.0697919	0.194679
YBR058C	907.619	-1.08254	0.597527	-1.81171	0.0700318	0.1951
YNL336W	108.256	-1.58392	0.874522	-1.81119	0.0701121	0.1951
YDL132W	2121.95	-1.16488	0.643769	-1.80947	0.0703786	0.195541
YDR097C	1203.4	-1.07597	0.59535	-1.80728	0.0707182	0.196312
YOR384W	23.653	-1.8568	1.028	-1.80622	0.0708836	0.196685
YJR125C	605.6	-1.13365	0.628643	-1.80333	0.0713364	0.197508
YGR033C	1571.63	-1.09816	0.60986	-1.80067	0.0717552	0.198524
YPL171C	53.6171	-1.54392	0.859747	-1.79579	0.0725279	0.200369
YDR272W	431.846	-1.08218	0.604394	-1.79052	0.0733699	0.201907
YOL131W	30.0208	-1.56877	0.876156	-1.79051	0.0733714	0.201907
YOR110W	801.164	-1.12599	0.628983	-1.79018	0.0734244	0.201965
YPR049C	2130.49	-1.02299	0.572304	-1.78749	0.0738585	0.202895
YNL318C	39.5274	-1.49394	0.837946	-1.78287	0.0746082	0.20451
YDL021W	54.362	-1.3344	0.749625	-1.78009	0.0750606	0.205395
YOR141C	2027	-1.10422	0.620446	-1.77972	0.0751221	0.205474
YOR385W	715.135	-1.44255	0.810813	-1.77915	0.0752156	0.205553
YHR074W	623.487	-1.07804	0.606102	-1.77864	0.0752984	0.205601
YDR125C	519.55	-1.02807	0.579233	-1.77487	0.0759187	0.207027
YNL287W	2821.5	-1.14771	0.647234	-1.77326	0.0761859	0.207419
YIL156W-A	5.57345	-3.04335	1.71649	-1.77301	0.0762272	0.207422
YPL028W	646.463	-1.13896	0.642617	-1.77237	0.0763325	0.207441
YBL102W	281.429	-1.07047	0.605449	-1.76806	0.0770513	0.208946
YOR114W	256.899	-1.40891	0.797145	-1.76745	0.077153	0.209132
YOR290C	5323.14	-1.17757	0.666811	-1.76598	0.0773992	0.209531
YDR374W-A	138.759	-1.12825	0.639091	-1.7654	0.077497	0.209616
YIL013C	396.8	-1.14805	0.6509	-1.76379	0.0777671	0.210257
YNL297C	2673.79	-1.19378	0.677081	-1.76313	0.0778792	0.21047
YFR027W	81.7139	-1.20693	0.685013	-1.76191	0.0780837	0.210763
YLR239C	119.855	-1.15172	0.653866	-1.7614	0.0781706	0.210763
YNL052W	529.807	-1.10987	0.630144	-1.7613	0.0781872	0.210763
YBR145W	148.8	-1.12165	0.637152	-1.7604	0.0783393	0.210993
YKR096W	3660.99	-1.0965	0.623098	-1.75975	0.0784497	0.2112
YLR252W	35.8695	-1.70949	0.973736	-1.75559	0.0791579	0.212634
YMR115W	588.65	-1.06875	0.609389	-1.7538	0.0794654	0.213119
YMR307C-A	3.56699	-4.13262	2.35865	-1.75211	0.0797542	0.213629
YJR045C	6379.85	-1.15548	0.660597	-1.74914	0.0802672	0.214633
YGR108W	54.7728	-1.36087	0.778744	-1.74751	0.0805483	0.215203
YJR038C	7.43149	-2.82796	1.61859	-1.74717	0.0806072	0.21527
YPL189C-A	468.143	-1.09939	0.629423	-1.74666	0.0806962	0.215417
YPL253C	420.694	-1.09974	0.630437	-1.74442	0.0810865	0.216081
YNL269W	130.93	-1.2558	0.720141	-1.74383	0.081189	0.216085
YFR008W	183.529	-1.08975	0.625006	-1.74358	0.0812319	0.216085
YHR159W	398.45	-1.17914	0.676322	-1.74346	0.0812536	0.216085
YLR425W	1690.14	-1.10552	0.635183	-1.74048	0.0817752	0.217245
YOR275C	803.779	-1.0888	0.626707	-1.73733	0.0823285	0.218393
YJL206C	561.946	-1.04391	0.601626	-1.73515	0.0827137	0.218865
YCL043C	3556.1	-1.205	0.69476	-1.73441	0.0828451	0.219065
YBR216C	724.457	-1.09976	0.634307	-1.73379	0.0829549	0.219223
YOR020W-A	166.271	-1.13739	0.65612	-1.73351	0.0830054	0.219223
YLR256W	5751.87	-1.19711	0.691103	-1.73218	0.0832414	0.219518
YGL122C	3159.29	-1.12257	0.648527	-1.73095	0.0834608	0.219923
YHR091C	532.481	-1.049	0.60684	-1.72862	0.0838767	0.220743
YMR052C-A	28.4305	-1.8098	1.04927	-1.72482	0.08456	0.222079
YLR128W	161.089	-1.10006	0.638614	-1.72258	0.0849641	0.223048
YNL223W	826.887	-1.02014	0.592926	-1.72052	0.0853372	0.223786
YJR104C	1415.35	-1.16552	0.677638	-1.71997	0.0854379	0.223828
YFL060C	22.1931	-1.63816	0.953026	-1.7189	0.0856329	0.224246
YJL225C	108.096	-1.22092	0.712574	-1.71339	0.0866412	0.22626
YFR023W	103.164	-1.24421	0.726194	-1.71333	0.086652	0.22626
YLR173W	1303.9	-0.991268	0.579163	-1.71155	0.0869793	0.226784
YDR477W	1780.78	-1.06634	0.623061	-1.71146	0.0869959	0.226784
YMR081C	864.497	-1.06205	0.621224	-1.70961	0.0873387	0.227397
YPL152W-A	9.87012	-2.20329	1.28916	-1.70909	0.0874336	0.227407
YBL085W	1362.09	-1.1158	0.653039	-1.70863	0.0875199	0.227413
YFR021W	415.503	-1.09192	0.639198	-1.70826	0.0875874	0.227483
YNR036C	293.994	-1.04855	0.61483	-1.70543	0.0881147	0.228478
YGL060W	460.223	-1.04945	0.615732	-1.7044	0.0883069	0.228788
YMR094W	229.75	-1.02943	0.605617	-1.6998	0.0891684	0.230737
YBL019W	147.233	-1.07489	0.632473	-1.6995	0.0892252	0.23079
YEL066W	65.2886	-1.20183	0.709825	-1.69314	0.0904286	0.233331
YDR343C	62.2995	-1.36379	0.806502	-1.69099	0.0908383	0.234197
YNL135C	366.738	-1.03716	0.614294	-1.68838	0.0913382	0.235027
YNL034W	26.8124	-1.56287	0.925686	-1.68834	0.091346	0.235027
YJR037W	2.21029	-4.93079	2.9227	-1.68707	0.0915906	0.235561
YNR031C	3319.04	-1.03963	0.616963	-1.68508	0.0919734	0.236162
YGR168C	251.267	-1.02852	0.610964	-1.68343	0.0922909	0.236726
YBR136W	2287.41	-1.09484	0.650371	-1.68342	0.0922948	0.236726
YKL039W	1659.99	-0.996031	0.591726	-1.68326	0.0923238	0.236726
YOR155C	539.139	-1.03409	0.615344	-1.68051	0.0928591	0.237634
YOR261C	1209.39	-1.15659	0.688372	-1.68018	0.0929218	0.237634
YOR087W	481.531	-1.05941	0.631081	-1.67873	0.093205	0.238166
YOL073C	211.002	-1.0543	0.628647	-1.67709	0.0935252	0.238887
YLR452C	551.514	-1.01163	0.603291	-1.67686	0.0935702	0.238906
YOR083W	426.316	-1.066	0.635886	-1.6764	0.0936604	0.238944
YOL081W	16691.2	-1.067	0.637249	-1.67439	0.0940534	0.239753
YJR106W	875.254	-0.979238	0.584962	-1.67402	0.0941265	0.239756
YHL017W	671.808	-1.00143	0.598677	-1.67273	0.09438	0.240199
YNL272C	882.054	-1.01281	0.605685	-1.67217	0.0944915	0.240386
YBR201C-A	175.696	-1.39395	0.833757	-1.67189	0.0945465	0.240429
YDR451C	92.6501	-1.23136	0.737362	-1.66995	0.0949288	0.241014
YER181C	28.875	-1.45548	0.871772	-1.66957	0.0950048	0.24111
YDR455C	4.85275	-3.40662	2.04142	-1.66875	0.0951674	0.24133
YOR383C	236.22	-1.15418	0.691729	-1.66854	0.0952085	0.241332
YFR052W	1036.03	-1.06951	0.641605	-1.66692	0.0955298	0.241861
YPR011C	132.391	-1.07852	0.647676	-1.66522	0.0958685	0.242581
YPL066W	950.165	-0.99919	0.600559	-1.66376	0.0961594	0.243061
YDR169C	1484.55	-1.07424	0.645807	-1.6634	0.0962324	0.243061
YER084W-A	22.7608	-1.59602	0.959609	-1.6632	0.0962724	0.243061
YDR430C	1918.19	-1.00801	0.60628	-1.66261	0.0963904	0.243262
YGR290W	19.9627	-1.9042	1.14577	-1.66194	0.0965243	0.243406
YDL022C-A	10.3252	-2.22269	1.3376	-1.66169	0.0965743	0.243435
YLR350W	599.479	-1.11145	0.673778	-1.64958	0.0990294	0.248597
YBR137W	65.2926	-1.19019	0.721516	-1.64957	0.0990316	0.248597
YGL233W	1231.76	-1.05742	0.64107	-1.64946	0.0990542	0.248597
YCL049C	401.386	-1.17468	0.712928	-1.64768	0.0994179	0.249115
YDR274C	11.1744	-2.47573	1.50323	-1.64695	0.0995689	0.24915
YER166W	3755.82	-0.960059	0.583438	-1.64552	0.099863	0.249638
YDL125C	837.103	-1.21149	0.736448	-1.64504	0.099962	0.249787
YML032C	888.256	-1.13931	0.692976	-1.64408	0.10016	0.249886
YLL050C	485.647	-1.09662	0.667789	-1.64216	0.100556	0.250677
YHL016C	928.265	-1.04134	0.634496	-1.6412	0.100755	0.250909
YPL280W	31.0351	-1.40628	0.856888	-1.64114	0.100768	0.250909
YLR250W	571.587	-0.974521	0.594404	-1.63949	0.101111	0.251566
YER095W	746.271	-1.1404	0.696014	-1.63848	0.101322	0.251858
YDR027C	1069.75	-1.00066	0.61077	-1.63835	0.101348	0.251858
YNL097W-A	43.6155	-1.31849	0.80504	-1.63779	0.101465	0.25205
YGR135W	794.839	-1.06221	0.648651	-1.63757	0.101512	0.252068
YIL005W	921.112	-1.00109	0.611684	-1.63661	0.101711	0.25216
YKR002W	653.293	-0.950705	0.580952	-1.63646	0.101743	0.25216
YOR117W	1261.43	-1.06734	0.65255	-1.63565	0.101913	0.25247
YLR315W	47.6955	-1.28028	0.784892	-1.63115	0.102858	0.254114
YHR185C	18.5148	-1.64255	1.00717	-1.63086	0.102919	0.254167
YPR092W	7.83746	-2.44921	1.50492	-1.62747	0.103638	0.255543
YPR100W	177.29	-1.07423	0.660365	-1.62672	0.103797	0.255836
YER066W	71.2251	-1.52044	0.935466	-1.62532	0.104094	0.256268
YPL099C	148.229	-1.05381	0.648507	-1.62498	0.104167	0.25635
YOR042W	683.659	-1.08597	0.668797	-1.62377	0.104425	0.256884
YHL042W	33.7132	-1.37978	0.850636	-1.62206	0.10479	0.257528
YMR170C	357.304	-1.04767	0.645922	-1.62197	0.104809	0.257528
YLR415C	113.205	-1.55678	0.960461	-1.62087	0.105045	0.257934
YHL036W	540.5	-0.937743	0.578559	-1.62082	0.105056	0.257934
YDR540C	56.3	-1.75901	1.08539	-1.62062	0.105098	0.257939
YMR040W	225.092	-1.05083	0.650281	-1.61597	0.106101	0.259595
YDR375C	468.347	-0.988706	0.612544	-1.6141	0.106506	0.260486
YDL159W	690.874	-0.959975	0.594915	-1.61364	0.106607	0.260631
YLR190W	120.144	-1.10912	0.687452	-1.61338	0.106662	0.260665
YPL222C-A	32.4562	-1.47687	0.915939	-1.61241	0.106872	0.260977
YNL007C	994.026	-1.13311	0.70381	-1.60996	0.107406	0.262179
YIL156W	1092.61	-0.949108	0.590897	-1.60622	0.108227	0.26327
YOL075C	712.402	-0.929506	0.578874	-1.60571	0.108337	0.263437
YJR025C	142.983	-1.08931	0.678839	-1.60466	0.108568	0.263897
YDR286C	67.8842	-1.17664	0.734417	-1.60214	0.109126	0.265049
YBR168W	513.093	-0.970113	0.60628	-1.60011	0.109575	0.266019
YGL230C	12.7529	-1.85421	1.15891	-1.59995	0.109609	0.266019
YIL062C	284.175	-1.0868	0.680167	-1.59784	0.11008	0.266957
YNL334C	19.3577	-1.64615	1.03328	-1.59313	0.111132	0.268781
YGR127W	602.705	-1.12462	0.706082	-1.59276	0.111213	0.268781
YBR003W	253.601	-0.989081	0.620985	-1.59276	0.111214	0.268781
YKL196C	684.659	-0.977094	0.614503	-1.59006	0.111822	0.269873
YMR119W-A	5.0003	-2.86294	1.8006	-1.58999	0.111836	0.269873
YLR378C	1191.05	-0.924393	0.582107	-1.58801	0.112284	0.270518
YER058W	47.943	-1.23216	0.776471	-1.58687	0.112543	0.270518
YAL047C	221.84	-1.0204	0.643039	-1.58683	0.11255	0.270518
YLR142W	2380.44	-1.65771	1.04582	-1.58509	0.112946	0.271311
YGR048W	1232.15	-0.965685	0.610224	-1.58251	0.113533	0.272204
YBR269C	420.288	-0.936153	0.592399	-1.58027	0.114044	0.273061
YHL019C	382.486	-0.926854	0.586615	-1.58	0.114106	0.273061
YCR079W	326.646	-0.977358	0.618842	-1.57933	0.11426	0.273325
YBR255W	767.66	-0.986004	0.625011	-1.57758	0.114663	0.27385
YLR286C	558.594	-0.940824	0.596767	-1.57654	0.114903	0.274138
YGL138C	53.1314	-1.38641	0.879841	-1.57575	0.115083	0.274464
YPL250C	401.679	-0.947628	0.601691	-1.57494	0.11527	0.274705
YDR452W	981.186	-1.0507	0.667961	-1.57299	0.115722	0.275549
YNL219C	930.719	-0.948711	0.603928	-1.5709	0.116206	0.276414
YJL095W	1594.45	-1.00256	0.638514	-1.57015	0.116381	0.276676
YGL223C	477.693	-0.916761	0.585698	-1.56525	0.117525	0.27882
YMR194C-B	176.926	-0.989725	0.63477	-1.55919	0.118952	0.281678
YPL188W	1381.51	-0.897737	0.575962	-1.55867	0.119074	0.281745
YKR001C	1332.39	-1.00292	0.643654	-1.55816	0.119196	0.281745
YDR131C	471.464	-1.03036	0.661354	-1.55796	0.119244	0.281745
YAL048C	388.607	-0.921856	0.591715	-1.55794	0.119248	0.281745
YPL271W	272.997	-0.931651	0.598975	-1.55541	0.119849	0.282768
YCR069W	662.527	-0.978128	0.62999	-1.55261	0.120517	0.28379
YER080W	624.653	-0.937418	0.603973	-1.55209	0.120641	0.283978
YGR122W	351.308	-1.17069	0.755452	-1.54966	0.121223	0.284818
YER116C	619.691	-0.896619	0.578761	-1.5492	0.121333	0.28497
YGR051C	19.8783	-1.65563	1.06951	-1.54803	0.121615	0.285422
YER068C-A	1.87657	-4.69576	3.03515	-1.54713	0.121833	0.285543
YLR259C	1981.3	-1.02784	0.664379	-1.54707	0.121847	0.285543
YDL133W	1029.92	-0.957426	0.619297	-1.54599	0.122107	0.28594
YDR177W	613.412	-0.910414	0.589825	-1.54353	0.122702	0.287227
YCL026C-B	20.2299	-1.53974	0.999756	-1.54011	0.123533	0.289065
YOR120W	353.935	-0.938115	0.609387	-1.53944	0.123697	0.289283
YKL170W	267.081	-0.93731	0.60932	-1.53829	0.123978	0.289786
YLR166C	765.02	-0.886083	0.576172	-1.53788	0.124078	0.289912
YPR023C	980.562	-0.878007	0.571103	-1.53739	0.124198	0.290052
YER044C	203.1	-1.12013	0.728654	-1.53726	0.124229	0.290052
YER182W	184.275	-1.00967	0.657369	-1.53592	0.124557	0.290491
YFR043C	75.2443	-1.06689	0.694693	-1.53578	0.124593	0.290491
YCL024W	451.798	-0.931482	0.606569	-1.53566	0.124623	0.290491
YKR098C	221.052	-0.955651	0.622348	-1.53556	0.124647	0.290491
YGR170W	371.728	-0.983954	0.641182	-1.53459	0.124884	0.290837
YGR022C	106.748	-1.28954	0.840321	-1.53458	0.124887	0.290837
YKR051W	464.542	-0.922306	0.601228	-1.53404	0.12502	0.29104
YML069W	1113.62	-0.950073	0.619529	-1.53354	0.125143	0.291218
YLL056C	315.321	-1.01764	0.663732	-1.53321	0.125224	0.291301
YMR031W-A	1.89229	-4.70678	3.07122	-1.53254	0.125389	0.291469
YMR155W	343.058	-0.929661	0.606724	-1.53226	0.125458	0.291522
YPL185W	1.84515	-4.67364	3.05076	-1.53196	0.125532	0.291588
YGR016W	242.798	-0.959105	0.627224	-1.52913	0.126233	0.292786
YHR158C	1730.74	-0.937512	0.614534	-1.52557	0.127118	0.294622
YCR093W	8601.26	-1.06327	0.697512	-1.52438	0.127414	0.295201
YAL002W	2586.54	-0.90835	0.596171	-1.52364	0.127598	0.295467
YPL163C	478.293	-0.964125	0.632854	-1.52346	0.127645	0.295467
YDL089W	403.437	-0.911506	0.598352	-1.52336	0.127669	0.295467
YMR258C	739.403	-0.920355	0.60478	-1.5218	0.128059	0.296045
YOL003C	231.494	-0.925244	0.60895	-1.51941	0.12866	0.297001
YMR099C	531.408	-0.936194	0.616717	-1.51803	0.129007	0.297511
YMR150C	61.8408	-1.15168	0.758671	-1.51802	0.12901	0.297511
YCL051W	917.725	-0.95753	0.63149	-1.5163	0.129443	0.298289
YBR273C	489.121	-0.910259	0.600831	-1.515	0.129773	0.298751
YIL041W	685.124	-0.932869	0.615792	-1.51491	0.129795	0.298751
YLL043W	1340.28	-0.940608	0.624161	-1.507	0.131811	0.302512
YLR111W	4.63516	-2.73935	1.81894	-1.50602	0.132063	0.302651
YNR062C	19.9845	-1.78007	1.18502	-1.50215	0.133058	0.304243
YDL230W	194.444	-0.955358	0.636053	-1.50201	0.133094	0.304243
YLL049W	42.1892	-1.19826	0.798057	-1.50148	0.133232	0.304448
YKL012W	1051.2	-0.970959	0.646972	-1.50077	0.133414	0.30473
YDR246W	642.217	-0.99642	0.664304	-1.49995	0.133628	0.304914
YLR225C	1551.29	-0.964301	0.643193	-1.49924	0.133811	0.305221
YCR014C	843.512	-0.888097	0.592768	-1.49822	0.134076	0.305605
YMR276W	893.88	-1.00527	0.672213	-1.49546	0.134794	0.306909
YGL207W	3279.93	-0.940509	0.629482	-1.4941	0.135149	0.307497
YCR036W	1057.94	-0.882279	0.591119	-1.49256	0.135553	0.308195
YCR075W-A	28.2589	-1.30498	0.874827	-1.4917	0.135777	0.308419
YNL267W	1949.1	-0.909592	0.609801	-1.49162	0.135798	0.308419
YJL094C	1768.62	-0.93388	0.626696	-1.49016	0.136181	0.309178
YML088W	2340.2	-0.858278	0.57612	-1.48976	0.136289	0.309312
YMR008C	1925.78	-0.880047	0.59098	-1.48913	0.136452	0.309573
YBR201W	283.02	-0.908386	0.610153	-1.48878	0.136544	0.30967
YER175W-A	32.939	-1.30358	0.875961	-1.48818	0.136704	0.309922
YJL154C	2628.26	-0.881384	0.592457	-1.48768	0.136836	0.310015
YKL097C	8.10114	-2.04781	1.37654	-1.48765	0.136843	0.310015
YEL057C	31.2093	-1.25273	0.843245	-1.4856	0.137384	0.310907
YJL091C	509.805	-0.942607	0.635196	-1.48396	0.137819	0.311668
YBR284W	572.827	-1.17848	0.794604	-1.48311	0.138046	0.311736
YDR363W-A	398.747	-1.06066	0.716953	-1.4794	0.139033	0.313292
YIR015W	318.642	-1.01079	0.683304	-1.47926	0.13907	0.313292
YPL264C	336.024	-0.928155	0.627836	-1.47834	0.139317	0.313651
YER125W	3000.9	-0.859082	0.581146	-1.47825	0.13934	0.313651
YHL038C	354.632	-1.07932	0.730302	-1.47791	0.139433	0.313749
YDR499W	1072.69	-0.85882	0.582456	-1.47448	0.140353	0.315374
YJL146W	658.712	-0.88753	0.6023	-1.47357	0.140598	0.315697
YHR033W	1192.68	-0.89571	0.608323	-1.47242	0.140907	0.316054
YJR073C	348.357	-1.03185	0.701086	-1.47179	0.141078	0.316327
YGL125W	1894.15	-0.871762	0.592779	-1.47064	0.141389	0.316688
YLR453C	518.658	-0.858084	0.584405	-1.4683	0.142022	0.317879
YLR271W	168.777	-0.960922	0.655538	-1.46585	0.142689	0.319075
YKR055W	230.715	-0.977015	0.667349	-1.46402	0.143187	0.320036
YDR406W	710.505	-0.9006	0.616139	-1.46168	0.143828	0.320715
YER026C	872.572	-0.886755	0.606694	-1.46162	0.143846	0.320715
YFR026C	24.3417	-1.33984	0.917326	-1.4606	0.144126	0.321227
YOL051W	2857.89	-0.884289	0.605786	-1.45974	0.144362	0.321527
YKL123W	4.69234	-2.82872	1.93838	-1.45933	0.144475	0.321553
YOL009C	160.128	-0.925589	0.635008	-1.4576	0.14495	0.32227
YER150W	417.513	-0.875458	0.60072	-1.45735	0.14502	0.322313
YBL088C	1634.07	-0.823377	0.565258	-1.45664	0.145216	0.322634
YLR442C	1937.1	-0.85006	0.583899	-1.45583	0.145438	0.323015
YJR151C	1586.14	-0.906834	0.623761	-1.45382	0.145997	0.323734
YCR011C	2557.08	-0.946604	0.651315	-1.45337	0.14612	0.323734
YMR168C	710.019	-0.873456	0.601552	-1.452	0.1465	0.324463
YKL057C	3608.83	-0.881219	0.607204	-1.45127	0.146704	0.324801
YPL194W	379.044	-0.91731	0.634032	-1.44679	0.147956	0.326888
YPL052W	935.166	-0.826934	0.572046	-1.44557	0.148297	0.327412
YDR381C-A	192.334	-0.891612	0.618808	-1.44085	0.149626	0.329885
YMR032W	17.6913	-1.51965	1.05561	-1.4396	0.149982	0.33044
YKR035W-A	444.956	-0.8947	0.621908	-1.43864	0.150253	0.330753
YLR193C	371.446	-0.902317	0.627244	-1.43854	0.150281	0.330753
YCR028C-A	208.78	-0.899244	0.625499	-1.43764	0.150536	0.3312
YHR017W	240.584	-0.909008	0.632553	-1.43705	0.150704	0.331456
YGL075C	351.486	-0.902343	0.628432	-1.43586	0.151041	0.331965
YHL034W-A	3.83589	-3.02913	2.11765	-1.43042	0.152596	0.334443
YJL093C	1107.73	-0.871389	0.609254	-1.43025	0.152644	0.334443
YML083C	13.5173	-1.83653	1.28535	-1.42882	0.153057	0.335232
YLR066W	104.349	-0.939415	0.65944	-1.42456	0.154283	0.337192
YMR199W	39.9811	-1.24405	0.873372	-1.42442	0.154324	0.337192
YJR092W	555.099	-0.841238	0.590712	-1.42411	0.154415	0.337224
YGL185C	210.708	-0.886895	0.622818	-1.424	0.154446	0.337224
YDL221W	60.2331	-1.51485	1.06397	-1.42377	0.154514	0.337253
YDR229W	469.731	-0.882573	0.619963	-1.42359	0.154565	0.337253
YHR198C	323.377	-0.90892	0.639031	-1.42234	0.154927	0.33781
YOR003W	129.332	-1.04785	0.737081	-1.42162	0.155137	0.337919
YKR053C	107.742	-0.970306	0.682746	-1.42118	0.155264	0.338078
YJR150C	37.474	-1.58839	1.11791	-1.42086	0.155358	0.338168
YHL046C	13.6648	-1.74676	1.23235	-1.41743	0.156358	0.339615
YML132W	6.02569	-2.3766	1.67784	-1.41646	0.156641	0.339791
YJR080C	348.303	-0.840709	0.595437	-1.41192	0.157974	0.341746
YGL228W	1194.23	-0.84111	0.596273	-1.41061	0.158359	0.342462
YOL118C	27.3992	-1.24145	0.881176	-1.40886	0.158877	0.343349
YLR045C	1096.4	-0.837274	0.595454	-1.40611	0.159692	0.344755
YJL180C	252.082	-0.85234	0.606856	-1.40452	0.160165	0.345306
YAL032C	530.577	-0.813371	0.579363	-1.40391	0.160347	0.345513
YLR428C	18.1857	-1.51093	1.07892	-1.40041	0.161391	0.347302
YLR079W	452.804	-0.840673	0.600346	-1.40031	0.16142	0.347302
YPR096C	68.6519	-1.04554	0.746956	-1.39973	0.161594	0.347388
YER047C	2410.81	-0.886492	0.634118	-1.39799	0.162115	0.348095
YAL044C	163.659	-1.05776	0.757138	-1.39705	0.162399	0.348535
YIL014C-A	20.5859	-1.35498	0.969968	-1.39693	0.162433	0.348535
YDR424C	108.671	-0.967184	0.692454	-1.39675	0.16249	0.348538
YFL020C	19.28	-1.41259	1.01187	-1.39602	0.162707	0.348887
YGR268C	433.14	-0.891257	0.639046	-1.39467	0.163116	0.349526
YOL089C	3010.9	-0.849265	0.610172	-1.39185	0.163969	0.350761
YBR272C	321.519	-0.824024	0.593836	-1.38763	0.16525	0.353025
YER010C	123.791	-0.912972	0.658243	-1.38698	0.165447	0.353325
YCL041C	7.86738	-1.95972	1.41592	-1.38407	0.166338	0.35475
YPR097W	2023.39	-0.84192	0.60852	-1.38355	0.166495	0.354966
YLR317W	26.7987	-1.2913	0.93461	-1.38164	0.167081	0.355735
YFR046C	202.486	-0.86665	0.628512	-1.37889	0.167928	0.357419
YGR047C	1755.44	-0.807758	0.586482	-1.37729	0.168421	0.358348
YIL006W	331.062	-0.816412	0.593575	-1.37541	0.169003	0.359283
YJL003W	136.46	-0.92134	0.67005	-1.37503	0.169121	0.359283
YGR253C	802.515	-0.886655	0.644859	-1.37496	0.169144	0.359283
YLR383W	1143.87	-0.79957	0.582717	-1.37214	0.17002	0.360416
YOL152W	161.74	-0.868363	0.632984	-1.37186	0.170108	0.360483
YGL113W	408.365	-0.840055	0.612637	-1.37121	0.170309	0.360668
YOR191W	3084.56	-0.828114	0.604348	-1.37026	0.170606	0.361176
YPL020C	1074.99	-0.841989	0.614892	-1.36933	0.170897	0.361489
YOR162C	1040.75	-0.784112	0.572663	-1.36924	0.170925	0.361489
YKL069W	129.647	-0.894663	0.653782	-1.36844	0.171174	0.361773
YBL044W	1.55857	-4.42831	3.24046	-1.36657	0.171761	0.362768
YHR076W	152.669	-0.877365	0.642209	-1.36617	0.171887	0.362768
YBR001C	2293.12	-0.801729	0.586912	-1.36601	0.171935	0.362768
YGL198W	83.5831	-0.92795	0.68033	-1.36397	0.172577	0.363578
YDR525W-A	869.97	-0.788482	0.578599	-1.36274	0.172964	0.363856
YMR065W	196.241	-0.841877	0.618075	-1.3621	0.173168	0.364034
YLR285C-A	21.837	-1.33926	0.983719	-1.36143	0.173379	0.364034
YIL154C	277.213	-0.845071	0.620728	-1.36142	0.173382	0.364034
YOL015W	167.207	-0.909215	0.667952	-1.3612	0.173451	0.364034
YLR306W	44.2001	-1.04893	0.771633	-1.35936	0.174031	0.364844
YGR140W	4571.69	-0.841523	0.619108	-1.35925	0.174067	0.364844
YOR356W	814.519	-0.792421	0.583361	-1.35837	0.174346	0.365207
YNR057C	107.293	-0.97697	0.719685	-1.3575	0.174624	0.365629
YPL150W	1276.94	-0.792293	0.583709	-1.35734	0.174673	0.365629
YLR181C	395.848	-0.81992	0.604611	-1.35611	0.175064	0.366327
YGR259C	6.95244	-1.99485	1.47221	-1.355	0.175416	0.366942
YDR030C	507.531	-0.801593	0.59185	-1.35439	0.175613	0.367112
YFL062W	39.278	-1.19812	0.885489	-1.35306	0.176037	0.367755
YMR089C	1753.91	-0.828063	0.612333	-1.35231	0.176277	0.367888
YNL106C	1467.87	-0.843571	0.62458	-1.35062	0.176816	0.368481
YGR178C	1384.73	-0.809893	0.599706	-1.35048	0.176861	0.368481
YNL254C	199.905	-0.899451	0.666045	-1.35043	0.176877	0.368481
YOL158C	317.89	-0.996857	0.738229	-1.35034	0.176908	0.368481
YER039C-A	72.3838	-0.946013	0.700983	-1.34955	0.17716	0.368884
YML029W	633.512	-0.845478	0.62707	-1.3483	0.177562	0.369181
YLR369W	1145.68	-0.777506	0.576718	-1.34815	0.177609	0.369181
YPL219W	571.682	-0.838473	0.622834	-1.34622	0.178231	0.370141
YJL165C	1831.46	-0.890523	0.661644	-1.34592	0.178327	0.370218
YCL021W-A	20.0979	-1.31053	0.975706	-1.34316	0.17922	0.371828
YAL042C-A	36.7832	-1.31244	0.977289	-1.34294	0.179292	0.371857
YGL021W	120.506	-0.870037	0.648121	-1.3424	0.179466	0.371976
YLR382C	765.694	-0.829386	0.618432	-1.34111	0.179885	0.372353
YLR036C	210.355	-0.83926	0.626265	-1.3401	0.180212	0.372787
YFL016C	1132.58	-0.812863	0.60757	-1.33789	0.180932	0.37391
YMR246W	8654.87	-0.924519	0.691767	-1.33646	0.181399	0.374753
YKR021W	1356.14	-0.800585	0.599318	-1.33583	0.181606	0.374936
YHR189W	98.1085	-0.919255	0.688326	-1.33549	0.181715	0.374989
YOR157C	620.874	-0.932534	0.698325	-1.33539	0.18175	0.374989
YER134C	93.9908	-0.928113	0.696304	-1.33291	0.18256	0.376323
YCL027W	98.5911	-0.911596	0.684662	-1.33145	0.183039	0.377035
YPR116W	356.6	-0.782654	0.588818	-1.32919	0.183784	0.377969
YNL131W	837.949	-0.920605	0.692915	-1.3286	0.183981	0.378096
YHR140W	93.7599	-1.08297	0.815184	-1.3285	0.184012	0.378096
YDR108W	483.821	-0.780891	0.587905	-1.32826	0.184093	0.378097
YBR184W	134.596	-0.87972	0.663061	-1.32676	0.18459	0.378749
YBR005W	1157	-0.839664	0.633033	-1.32641	0.184703	0.378859
YNL259C	68.1111	-0.943239	0.712104	-1.32458	0.18531	0.379491
YPL242C	1270.95	-0.764197	0.577214	-1.32394	0.185523	0.379803
YEL059C-A	79.4749	-0.906391	0.685736	-1.32178	0.186242	0.380783
YPL120W	386.282	-0.77605	0.587283	-1.32143	0.18636	0.3809
YPR095C	1800.61	-0.797347	0.604523	-1.31897	0.18718	0.38233
YIL030W-A	9.18371	-1.92673	1.46244	-1.31748	0.187679	0.382911
YBL006W-A	11.5608	-1.60646	1.21942	-1.3174	0.187706	0.382911
YPL258C	250.176	-0.815442	0.61907	-1.3172	0.18777	0.382918
YOR082C	41.6011	-1.33016	1.01052	-1.3163	0.188072	0.383353
YDR016C	89.0439	-0.933673	0.709613	-1.31575	0.188258	0.383419
YBL108W	4.88267	-2.31507	1.7614	-1.31433	0.188735	0.384069
YOR207C	6974.13	-0.780116	0.593689	-1.31401	0.188842	0.384113
YGL034C	8.13388	-1.95312	1.48877	-1.3119	0.189553	0.385313
YBR226C	2.37356	-3.50696	2.67475	-1.31114	0.189812	0.385592
YGL028C	643.399	-0.77194	0.590033	-1.3083	0.190771	0.387266
YOL111C	426.716	-0.820116	0.626997	-1.30801	0.190871	0.387266
YOL063C	944.561	-0.754241	0.577434	-1.30619	0.191486	0.387898
YLL066C	26.4589	-1.31303	1.00636	-1.30473	0.191984	0.388703
YMR224C	481.966	-0.761396	0.583779	-1.30426	0.192147	0.388713
YOR363C	1826.57	-0.790184	0.606402	-1.30307	0.192551	0.389407
YML008C	374.666	-0.85193	0.653893	-1.30286	0.192623	0.389428
YKL096W	1969.21	-1.14263	0.87781	-1.30168	0.193027	0.389995
YBR274W	478.736	-0.764869	0.589491	-1.29751	0.194456	0.391983
YKL105C	1240.75	-0.818908	0.631419	-1.29693	0.194655	0.392033
YIR030W-A	18.2418	-1.31495	1.01498	-1.29555	0.195132	0.39287
YDR154C	8.06208	-1.80674	1.39843	-1.29198	0.196365	0.394474
YHR132C	1168.1	-0.777039	0.602149	-1.29044	0.196896	0.394915
YMR314W	384.079	-0.834303	0.646785	-1.28992	0.197077	0.395153
YLR102C	234.997	-0.78482	0.609454	-1.28774	0.197836	0.396297
YKR070W	114.991	-0.873387	0.678388	-1.28744	0.197939	0.39638
YKR018C	2070.48	-0.743361	0.577629	-1.28692	0.198123	0.396621
YKL032C	3114.46	-0.916202	0.712292	-1.28627	0.198348	0.396947
YJR108W	161.105	-0.825763	0.642655	-1.28492	0.198819	0.397698
YLR087C	2840.09	-0.769848	0.599298	-1.28458	0.198938	0.397698
YDL195W	2273.91	-0.81271	0.632867	-1.28417	0.199082	0.397698
YLR379W	10.8639	-1.6611	1.29362	-1.28408	0.199115	0.397698
YOR125C	107.95	-0.84137	0.655393	-1.28376	0.199225	0.397698
YLR201C	155.895	-0.829778	0.646455	-1.28358	0.199289	0.397698
YOR192C	509.484	-0.774088	0.603307	-1.28308	0.199465	0.397925
YBL040C	211.36	-0.78613	0.612895	-1.28265	0.199615	0.398097
YGR042W	276.549	-0.796521	0.621146	-1.28234	0.199724	0.398189
YMR027W	430.987	-0.809722	0.631933	-1.28134	0.200074	0.398762
YBL059C-A	170.337	-0.84276	0.658253	-1.2803	0.200441	0.399211
YMR164C	1889.78	-0.767872	0.600304	-1.27914	0.200848	0.39944
YNR045W	401.743	-0.770224	0.602274	-1.27886	0.200946	0.39944
YDR328C	594.365	-0.76518	0.598583	-1.27832	0.201137	0.399623
YCL028W	338.763	-0.768321	0.601398	-1.27756	0.201405	0.399905
YLR220W	506.481	-0.752604	0.589267	-1.27719	0.201537	0.400041
YDR307W	572.016	-0.747805	0.586058	-1.27599	0.201959	0.400627
YGR100W	1603.86	-0.780593	0.612996	-1.27341	0.202874	0.401473
YJL058C	105.854	-0.888663	0.697891	-1.27335	0.202892	0.401473
YEL052W	196.124	-0.813786	0.639484	-1.27257	0.203172	0.401775
YOL038W	377.607	-0.836505	0.657847	-1.27158	0.203523	0.402343
YKL109W	2247.43	-0.899275	0.70791	-1.27032	0.203969	0.4031
YML028W	1271.21	-0.94733	0.746461	-1.26909	0.204407	0.403708
YPL067C	97.5625	-0.842103	0.664623	-1.26704	0.205141	0.404784
YMR313C	1282.32	-0.759264	0.599638	-1.2662	0.20544	0.405176
YJR130C	716.325	-0.741919	0.586247	-1.26554	0.205678	0.40536
YDR403W	98.42	-1.01037	0.799083	-1.26441	0.206084	0.405635
YKL001C	395.323	-0.752473	0.596864	-1.26071	0.207413	0.407742
YDR141C	1985.79	-0.78905	0.626093	-1.26028	0.20757	0.407919
YKR077W	307.456	-0.759393	0.603098	-1.25915	0.207975	0.408467
YGL131C	2260.73	-0.744731	0.591869	-1.25827	0.208294	0.408967
YBR287W	3758.97	-0.749953	0.597469	-1.25522	0.2094	0.410521
YJR155W	589.812	-0.759638	0.605197	-1.25519	0.20941	0.410521
YER048C	925.889	-0.742105	0.591888	-1.25379	0.209917	0.411161
YGR184C	5461.37	-0.767137	0.611959	-1.25358	0.209996	0.411161
YMR092C	554.472	-0.746716	0.597288	-1.25018	0.211235	0.413075
YER017C	2223.53	-0.802351	0.642671	-1.24846	0.211862	0.414046
YOR126C	181.6	-0.778437	0.623919	-1.24766	0.212157	0.414394
YJL123C	865.272	-0.754962	0.605195	-1.24747	0.212226	0.414394
YDL028C	1310.18	-0.779261	0.624788	-1.24724	0.21231	0.414394
YPR052C	33.7609	-1.04294	0.837824	-1.24482	0.213197	0.415757
YGL053W	36.1751	-1.00614	0.809889	-1.24232	0.214117	0.41726
YJR086W	217.284	-0.822738	0.662322	-1.2422	0.214162	0.41726
YBL086C	746.378	-0.812965	0.654577	-1.24197	0.214248	0.417292
YAL026C	1127.99	-0.770736	0.622312	-1.2385	0.215529	0.419658
YNL037C	608.033	-0.788091	0.636599	-1.23797	0.215727	0.419786
YNL218W	456.323	-0.722651	0.58447	-1.23642	0.216302	0.420776
YDR494W	679.702	-0.757074	0.612498	-1.23604	0.216443	0.42085
YAL064W-B	181.198	-0.851093	0.688609	-1.23596	0.216473	0.42085
YKR054C	2980.16	-0.756006	0.611918	-1.23547	0.216656	0.421077
YOR256C	1359.08	-0.734037	0.594594	-1.23452	0.217011	0.421248
YPL036W	1562.98	-0.792696	0.642394	-1.23397	0.217213	0.421383
YML084W	12.3086	-1.56792	1.27243	-1.23223	0.217864	0.422388
YKL131W	3.70691	-2.43562	1.97805	-1.23132	0.218203	0.422915
YIL066W-A	5.43247	-2.09365	1.70428	-1.22847	0.219271	0.424462
YNL279W	68.8551	-0.924014	0.753003	-1.22711	0.219783	0.425196
YJR019C	183.827	-0.77097	0.629669	-1.2244	0.2208	0.426641
YMR144W	71.7118	-0.929213	0.759031	-1.22421	0.220873	0.426653
YML051W	380.47	-0.720813	0.589302	-1.22316	0.221268	0.426895
YHR199C-A	189.754	-0.779132	0.637361	-1.22243	0.221543	0.427296
YDL248W	153.984	-0.89965	0.736221	-1.22198	0.221714	0.427494
YIL141W	27.4147	-1.12006	0.916999	-1.22144	0.221921	0.427503
YJR006W	459.515	-0.753317	0.616994	-1.22095	0.222106	0.427729
YBR124W	3.72262	-2.4423	2.00349	-1.21902	0.222836	0.428689
YBR064W	4.58039	-2.20189	1.80733	-1.21831	0.223107	0.428802
YLL051C	1177.3	-0.695207	0.57067	-1.21823	0.223137	0.428802
YAL044W-A	60.6754	-0.941159	0.773315	-1.21705	0.223587	0.42936
YEL056W	615.734	-0.74184	0.609599	-1.21693	0.223631	0.42936
YJL064W	6.79726	-1.90991	1.5709	-1.21581	0.224059	0.429804
YIR022W	47.9115	-0.977636	0.805151	-1.21423	0.224661	0.430295
YFR047C	78.5313	-0.905958	0.74674	-1.21322	0.225047	0.430854
YLR094C	1838.02	-0.742057	0.61182	-1.21287	0.22518	0.430854
YJR034W	75.6734	-0.924494	0.762516	-1.21243	0.225349	0.430854
YGL183C	150.637	-0.86624	0.715079	-1.21139	0.225746	0.431075
YDL062W	7.6393	-1.83431	1.51611	-1.20988	0.226326	0.431916
YER093C-A	98.7274	-0.895898	0.740603	-1.20969	0.226399	0.431924
YDR376W	222.81	-0.789512	0.65365	-1.20785	0.227104	0.43262
YIL129C	3412.64	-0.760489	0.630754	-1.20568	0.22794	0.433558
YDR137W	620.42	-0.705753	0.586532	-1.20326	0.228874	0.434943
YOR057W	296.237	-0.719453	0.599343	-1.2004	0.229983	0.436096
YLR041W	65.1469	-0.894168	0.745182	-1.19993	0.230166	0.436096
YMR084W	383.463	-0.884143	0.736833	-1.19992	0.230169	0.436096
YGR189C	12083.5	-0.72188	0.602053	-1.19903	0.230516	0.436623
YGR230W	131.045	-0.803647	0.670834	-1.19798	0.230924	0.437133
YJR030C	188.002	-0.753711	0.631952	-1.19267	0.232998	0.44
YPL059W	237.27	-0.72643	0.609164	-1.1925	0.233064	0.44
YJR160C	11.8768	-1.49602	1.25574	-1.19135	0.233518	0.440571
YOR362C	1107.97	-0.747759	0.628613	-1.18954	0.234228	0.441277
YOL038C-A	6.73922	-1.78509	1.50093	-1.18932	0.234314	0.441308
YOR014W	3003.51	-0.75804	0.637593	-1.18891	0.234476	0.441481
YKL179C	979.171	-0.783489	0.659325	-1.18832	0.234708	0.441786
YDR169C-A	42.0029	-0.940309	0.79188	-1.18744	0.235055	0.442045
YML079W	145.019	-0.75617	0.637046	-1.18699	0.23523	0.442112
YLR138W	3224.01	-0.691802	0.582907	-1.18681	0.235301	0.442115
YPL236C	545.981	-0.701994	0.591831	-1.18614	0.235567	0.442484
YHR180W-A	12.8293	-1.4131	1.19213	-1.18535	0.235879	0.442899
YPL193W	1208.62	-0.688999	0.581323	-1.18523	0.235928	0.442899
YNR070W	11.4746	-1.4506	1.22644	-1.18278	0.236897	0.444455
YNL072W	72.909	-0.826685	0.699139	-1.18243	0.237034	0.444579
YNL073W	644.94	-0.717305	0.607197	-1.18134	0.237468	0.444986
YPL260W	1707.43	-0.762431	0.645513	-1.18112	0.237553	0.444986
YBR107C	229.003	-0.75821	0.642098	-1.18083	0.237669	0.444986
YDR170C	3475.4	-0.737845	0.625517	-1.17958	0.238169	0.445652
YPR182W	155.609	-0.754417	0.639878	-1.179	0.238397	0.445838
YAL019W-A	39.6731	-1.04781	0.889012	-1.17862	0.23855	0.44597
YBR196C	4792.91	-0.850529	0.721879	-1.17821	0.238711	0.446007
YNR028W	247.605	-0.711186	0.604216	-1.17704	0.23918	0.446349
YLR091W	288.908	-0.704153	0.598315	-1.17689	0.239238	0.446349
YGR270W	4446.15	-0.740313	0.629052	-1.17687	0.239247	0.446349
YPL080C	2.03984	-3.27167	2.78812	-1.17343	0.240622	0.448172
YDR379W	1506.69	-0.695057	0.592567	-1.17296	0.240812	0.448212
YKR078W	397.097	-0.692244	0.590437	-1.17243	0.241025	0.448478
YAL001C	2113.82	-0.694797	0.594529	-1.16865	0.242544	0.450907
YIL050W	359.798	-0.759577	0.650713	-1.1673	0.243089	0.451511
YDR201W	122.931	-0.7815	0.66985	-1.16668	0.24334	0.451511
YGR288W	334.433	-0.770665	0.662176	-1.16384	0.24449	0.453057
YPR106W	635.395	-0.725747	0.624449	-1.16222	0.245146	0.453613
YBR126W-B	1.25629	-4.11624	3.54174	-1.16221	0.245152	NA
YJR066W	3283.39	-0.726832	0.626057	-1.16097	0.245654	0.454421
YPR013C	419.361	-0.700656	0.603982	-1.16006	0.246024	0.454839
YJL092W	889.425	-0.762353	0.657784	-1.15897	0.246467	0.455526
YGL141W	1521.94	-0.721382	0.622787	-1.15831	0.246737	0.45572
YGR193C	501.517	-0.726885	0.627607	-1.15818	0.246789	0.45572
YJL004C	517.47	-0.675918	0.584578	-1.15625	0.247579	0.456913
YHR200W	533.384	-0.741293	0.64302	-1.15283	0.24898	0.458753
YGL153W	300.04	-0.740012	0.642138	-1.15242	0.249149	0.458875
YMR097C	308.145	-0.714703	0.620363	-1.15207	0.249291	0.459003
YNL120C	2.07695	-3.18812	2.77104	-1.15051	0.249932	0.459878
YNL214W	183.579	-0.720256	0.62694	-1.14884	0.250621	0.460647
YNL118C	1930.05	-0.815632	0.710116	-1.14859	0.250725	0.460705
YLR231C	210.869	-0.77394	0.673957	-1.14835	0.250823	0.460752
YMR085W	415.45	-0.867624	0.756289	-1.14721	0.251294	0.461137
YBR076W	301.299	-0.686548	0.599036	-1.14609	0.251759	0.46121
YIL001W	436.796	-0.709773	0.619416	-1.14587	0.251847	0.46121
YGL249W	86.1947	-0.796541	0.695178	-1.14581	0.251874	0.46121
YJR107W	212.59	-0.71173	0.621939	-1.14437	0.252469	0.461784
YFL039C	4363.19	-0.702243	0.614098	-1.14354	0.252816	0.462133
YDL007C-A	6.03423	-1.81374	1.58687	-1.14297	0.253053	0.462312
YCL069W	1.22486	-4.08312	3.57268	-1.14287	0.253092	NA
YAL009W	182.301	-0.740277	0.647789	-1.14277	0.253133	0.462312
YGL074C	2.10837	-3.20823	2.81178	-1.141	0.253871	0.463127
YNL013C	2.10837	-3.20823	2.81178	-1.141	0.253871	0.463127
YBL077W	10.2932	-1.42294	1.24731	-1.14081	0.253949	0.463135
YDR260C	141.166	-0.728453	0.639796	-1.13857	0.254882	0.464569
YDL243C	109.946	-0.879633	0.77434	-1.13598	0.255966	0.465874
YCR032W	1648.72	-0.640959	0.566433	-1.13157	0.257815	0.468835
YNL127W	1137.51	-0.669801	0.592652	-1.13018	0.258402	0.469769
YHR155W	2384.25	-0.687641	0.609007	-1.12912	0.258847	0.470406
YDL106C	1556.18	-0.692636	0.613499	-1.12899	0.258901	0.470406
YCR094W	537.968	-0.720189	0.638057	-1.12872	0.259016	0.470478
YGL038C	1831.43	-0.64147	0.568974	-1.12742	0.259566	0.471253
YIL014W	1168.92	-0.662652	0.588745	-1.12553	0.260363	0.472519
YPL161C	442.716	-0.688954	0.6123	-1.12519	0.260509	0.472648
YER167W	5252.62	-0.666356	0.593893	-1.12201	0.261857	0.474537
YBR211C	550.47	-0.662334	0.590393	-1.12185	0.261925	0.474537
YOR186C-A	21.816	-1.24367	1.10882	-1.12161	0.262027	0.474587
YBL066C	2891.51	-0.667267	0.595895	-1.11977	0.262811	0.47587
YNL025C	381.677	-0.681788	0.609246	-1.11907	0.263112	0.476006
YMR257C	1249.75	-0.686771	0.61483	-1.11701	0.26399	0.477297
YML100W-A	6.48493	-1.7835	1.59688	-1.11687	0.264051	0.477297
YHR082C	4842.59	-0.699179	0.628825	-1.11188	0.266189	0.480065
YDR476C	128.51	-0.721536	0.649205	-1.11141	0.26639	0.480154
YMR075C-A	8.34016	-1.60758	1.44956	-1.10901	0.267426	0.481459
YML081C-A	369.974	-0.686278	0.618909	-1.10885	0.267494	0.481459
YBR294W	343.589	-0.832642	0.75166	-1.10774	0.267975	0.48207
YGL002W	299.969	-0.657136	0.59497	-1.10449	0.269382	0.484169
YLR056W	423.443	-0.647777	0.587016	-1.10351	0.269807	0.484795
YOL033W	155.803	-0.717234	0.650517	-1.10256	0.270218	0.485258
YBR049C	2066.49	-0.792432	0.718913	-1.10226	0.270347	0.485351
YLR268W	127.213	-0.713575	0.647475	-1.10209	0.270423	0.485351
YGR116W	4411.01	-0.658267	0.598047	-1.10069	0.271029	0.485658
YBR024W	180.608	-0.706333	0.642119	-1.1	0.27133	0.486015
YDL107W	199.476	-0.676843	0.615711	-1.09929	0.271643	0.486438
YER159C	1094.41	-0.641456	0.583888	-1.09859	0.271945	0.486503
YOL086W-A	42.7913	-0.851536	0.775451	-1.09812	0.272153	0.486503
YDR282C	251.276	-0.678288	0.617738	-1.09802	0.272196	0.486503
YDL172C	32.8477	-0.921525	0.839428	-1.0978	0.272291	0.486503
YOL034W	1070.7	-0.658132	0.599631	-1.09756	0.272396	0.486548
YDL086W	133.312	-0.713181	0.651078	-1.09538	0.273348	0.487348
YOL100W	3063.67	-0.699726	0.638841	-1.09531	0.273383	0.487348
YGR261C	896.886	-0.714018	0.652385	-1.09447	0.273748	0.487534
YDR530C	339.712	-0.657371	0.600895	-1.09399	0.273961	0.487692
YBR109C	767.972	-0.628642	0.575088	-1.09312	0.27434	0.488229
YER024W	10946.1	-0.707374	0.647996	-1.09163	0.274994	0.489257
YLL025W	48.2258	-0.856998	0.785499	-1.09102	0.275262	0.489595
YDL190C	1429.06	-0.645619	0.592809	-1.08908	0.276117	0.490777
YGR186W	1497.18	-0.646643	0.59419	-1.08828	0.276472	0.491175
YLR389C	1631.49	-0.653272	0.600363	-1.08813	0.276538	0.491175
YPL228W	1020.26	-0.669641	0.616769	-1.08572	0.277601	0.492235
YHR199C	491.863	-0.668069	0.615796	-1.08489	0.277972	0.492395
YGR161W-C	502.312	-0.654109	0.603956	-1.08304	0.27879	0.493513
YNR033W	456.039	-0.636295	0.588117	-1.08192	0.279288	0.493981
YBL049W	485.067	-0.691342	0.639905	-1.08038	0.279972	0.494915
YBR174C	2.88189	-2.54761	2.36199	-1.07858	0.280773	0.495915
YNR001W-A	2.88189	-2.54761	2.36199	-1.07858	0.280773	0.495915
YLR434C	40.4386	-0.907157	0.843777	-1.07511	0.282323	0.497959
YLR465C	21.0259	-1.12975	1.0511	-1.07483	0.282451	0.498045
YHL050C	351.604	-0.66881	0.622399	-1.07457	0.282568	0.498113
YKR095W	3757.57	-0.724066	0.67544	-1.07199	0.283724	0.4995
YMR100W	2641.59	-0.707689	0.660307	-1.07176	0.283829	0.4995
YLR092W	307.445	-0.670793	0.626779	-1.07022	0.284519	0.500576
YBR096W	84.54	-0.739724	0.691629	-1.06954	0.284827	0.500979
YDR005C	1541.41	-0.682636	0.638829	-1.06857	0.285261	0.501353
YLL063C	288.389	-0.676252	0.632979	-1.06836	0.285356	0.501353
YNL102W	758.622	-0.642684	0.602048	-1.0675	0.285748	0.501902
YPR117W	3110.81	-0.635025	0.594977	-1.06731	0.285831	0.501909
YML085C	213.841	-0.657862	0.616568	-1.06697	0.285983	0.502037
YCR077C	1711.69	-0.662261	0.621505	-1.06558	0.286616	0.502728
YLR028C	1803.32	-0.631276	0.592941	-1.06465	0.287034	0.503322
YBL080C	208.597	-0.678511	0.637803	-1.06383	0.287408	0.503471
YMR190C	1409.92	-0.63623	0.598398	-1.06322	0.287681	0.503622
YOR111W	116.12	-0.70071	0.65935	-1.06273	0.287905	0.503874
YDL144C	260.58	-0.638142	0.600883	-1.06201	0.288233	0.504308
YEL009C-A	47.7591	-0.868974	0.818577	-1.06157	0.288433	0.504426
YDL129W	563.715	-0.629419	0.593517	-1.06049	0.288922	0.504778
YGL181W	399.93	-0.628055	0.5923	-1.06037	0.288978	0.504778
YDR319C	262.034	-0.699196	0.659623	-1.05999	0.289148	0.504933
YLL048C	4332.06	-0.594504	0.561952	-1.05793	0.290089	0.505734
YLR289W	447.95	-0.623897	0.589975	-1.0575	0.290285	0.505734
YDR318W	438.711	-0.657081	0.62151	-1.05723	0.290406	0.505734
YDR246W-A	66.9956	-0.84515	0.800409	-1.0559	0.291015	0.506655
YNL331C	228.875	-0.657982	0.624071	-1.05434	0.291728	0.506945
YLR416C	7.1609	-1.54821	1.47189	-1.05185	0.292867	0.508065
YER177W	2322.39	-0.684331	0.650851	-1.05144	0.293057	0.508115
YJL047C	1276.43	-0.649377	0.618654	-1.04966	0.293874	0.509253
YER101C	461.27	-0.642977	0.61408	-1.04706	0.295073	0.510772
YKR014C	844.821	-0.610081	0.583015	-1.04642	0.295365	0.510998
YOR266W	236.679	-0.667014	0.637937	-1.04558	0.295755	0.511517
YGR154C	479.293	-0.63857	0.610823	-1.04542	0.295827	0.511517
YIL132C	39.3092	-0.877761	0.839925	-1.04505	0.296002	0.511679
YOR353C	1597.66	-0.5917	0.566928	-1.04369	0.296627	0.512481
YCR081C-A	24.665	-1.00397	0.963022	-1.04252	0.297169	0.512773
YML020W	462.771	-0.612606	0.587658	-1.04245	0.297201	0.512773
YMR267W	314.139	-0.63214	0.606963	-1.04148	0.297653	0.513178
YML012W	677.247	-0.628029	0.603048	-1.04142	0.297679	0.513178
YER028C	208.295	-0.654081	0.628357	-1.04094	0.297905	0.513428
YLR361C-A	39.2328	-0.847643	0.8156	-1.03929	0.298671	0.514426
YOR089C	1332.89	-0.639113	0.615008	-1.03919	0.298714	0.514426
YGL151W	1140.65	-0.625704	0.602195	-1.03904	0.298786	0.514426
YLR127C	873.545	-0.604811	0.582507	-1.03829	0.299135	0.514848
YGR235C	467.879	-0.618698	0.596972	-1.03639	0.300019	0.516087
YGR206W	66.9453	-0.75148	0.726201	-1.03481	0.300758	0.517219
YCL023C	1.20915	-4.06563	3.93103	-1.03424	0.301025	NA
YDL041W	1.20915	-4.06563	3.93103	-1.03424	0.301025	NA
YAR027W	52.2561	-0.811287	0.786428	-1.03161	0.302255	0.519229
YHR180W	34.6606	-0.881367	0.856094	-1.02952	0.303235	0.52063
YPL190C	4322.98	-0.660661	0.643068	-1.02736	0.304252	0.521869
YMR122W-A	2245.62	-0.621197	0.604756	-1.02719	0.304333	0.521869
YJL105W	206.293	-0.736214	0.716782	-1.02711	0.304369	0.521869
YGR269W	138.559	-0.679353	0.661757	-1.02659	0.304614	0.522007
YNL306W	548.439	-0.59302	0.578635	-1.02486	0.305429	0.522416
YFL029C	156.045	-0.645524	0.629895	-1.02481	0.305452	0.522416
YDL017W	288.875	-0.611071	0.596351	-1.02468	0.305513	0.522416
YLR424W	430.058	-0.608948	0.594618	-1.0241	0.305788	0.522605
YLR137W	101.271	-0.794122	0.777594	-1.02125	0.307134	0.524197
YIL007C	169.954	-0.633772	0.620787	-1.02092	0.307294	0.524329
YGR171C	274.591	-0.623081	0.610928	-1.01989	0.307779	0.525015
YOR249C	364.712	-0.610823	0.599796	-1.01838	0.308496	0.525813
YGL033W	28.5023	-0.89399	0.87875	-1.01734	0.30899	0.526373
YLR427W	923.64	-0.603413	0.593502	-1.0167	0.309296	0.526752
YHL031C	248.812	-0.615757	0.606054	-1.01601	0.309625	0.527041
YDL006W	559.776	-0.596033	0.586673	-1.01595	0.309651	0.527041
YHR192W	186.677	-0.630111	0.621035	-1.01461	0.31029	0.527381
YEL067C	25.0016	-0.948647	0.935137	-1.01445	0.31037	0.527381
YER149C	214.286	-0.628331	0.620106	-1.01326	0.310934	0.52798
YBR127C	2093.81	-0.578035	0.571617	-1.01123	0.311907	0.529061
YIL032C	6.77437	-1.47546	1.46008	-1.01053	0.31224	0.529061
YPR147C	127.457	-0.646051	0.639444	-1.01033	0.312336	0.52908
YOR218C	14.4183	-1.21797	1.20709	-1.00901	0.312968	0.529331
YDR173C	362.784	-0.60766	0.602251	-1.00898	0.312984	0.529331
YOR158W	504.948	-0.629127	0.625104	-1.00644	0.314206	0.531114
YLR233C	410.434	-0.632982	0.630169	-1.00446	0.315155	0.532291
YEL009C	4244.26	-0.659092	0.656547	-1.00388	0.315438	0.532547
YOR131C	45.811	-0.783905	0.780936	-1.0038	0.315474	0.532547
YCL042W	10.1214	-1.3292	1.32552	-1.00278	0.315968	0.533096
YEL002C	736.7	-0.587597	0.586608	-1.00169	0.316495	0.533675
YKL213C	786.466	-0.617858	0.616906	-1.00154	0.316564	0.533675
YFL041W	729.567	-0.576973	0.576486	-1.00084	0.316902	0.534103
YOR350C	733.884	-0.674859	0.675224	-0.999461	0.317572	0.534946
YOR284W	70.385	-0.822982	0.823717	-0.999108	0.317742	0.535003
YGR274C	2282.26	-0.611957	0.612614	-0.998927	0.31783	0.535003
YPL065W	173.824	-0.6662	0.668296	-0.996864	0.318831	0.536211
YPL149W	432.37	-0.651835	0.654015	-0.996667	0.318926	0.536229
YMR251W	168.972	-0.707836	0.711126	-0.995374	0.319554	0.537
YDR283C	2415.16	-0.577236	0.580092	-0.995077	0.319699	0.537101
YPR159C-A	1.79037	-2.93848	2.95583	-0.994132	0.320158	0.537474
YOR090C	1206.04	-0.612273	0.61759	-0.991391	0.321495	0.53926
YCR051W	322.415	-0.594644	0.601128	-0.989214	0.322558	0.540471
YLR438W	577.681	-0.633584	0.640625	-0.98901	0.322658	0.540496
YKL010C	4412.96	-0.564861	0.572625	-0.986442	0.323916	0.542203
YOL018C	750.289	-0.635575	0.646998	-0.982344	0.32593	0.544635
YOR080W	535.073	-0.62035	0.632013	-0.981547	0.326323	0.545048
YBL052C	1158.7	-0.560536	0.571356	-0.981062	0.326562	0.545188
YHR175W	330.524	-0.59684	0.608614	-0.980654	0.326764	0.545352
YKL020C	4329.52	-0.644005	0.656914	-0.980349	0.326914	0.545459
YJL028W	4.34663	-2.03625	2.08009	-0.978926	0.327616	0.546344
YER076C	109.41	-0.694164	0.709889	-0.977849	0.328149	0.546978
YPL071C	276.136	-0.597014	0.611522	-0.976275	0.328928	0.547472
YLR299C-A	25.4546	-0.903021	0.925086	-0.976148	0.328991	0.547472
YKR103W	604.256	-0.625093	0.640368	-0.976146	0.328992	0.547472
YMR281W	479.499	-0.616673	0.631744	-0.976144	0.328993	0.547472
YER078C	404.706	-0.67029	0.686782	-0.975987	0.329071	0.547472
YBL056W	1549.54	-0.604425	0.620109	-0.974708	0.329705	0.548095
YGR224W	13.2203	-1.15403	1.18485	-0.973986	0.330063	0.548462
YFR011C	183.538	-0.607354	0.62365	-0.973871	0.330121	0.548462
YNL265C	344.824	-0.588972	0.604908	-0.973655	0.330228	0.548462
YKL204W	1395.48	-0.652811	0.671074	-0.972785	0.33066	0.548818
YGL032C	74.3413	-0.745027	0.766292	-0.972249	0.330926	0.549116
YKL106C-A	28.1852	-0.878009	0.903639	-0.971637	0.331231	0.549333
YHR038W	124.65	-0.66157	0.681079	-0.971355	0.331371	0.549422
YJR005W	1610.13	-0.620303	0.639931	-0.969329	0.332381	0.550703
YLR125W	82.7443	-0.750602	0.775517	-0.967873	0.333108	0.551357
YLL003W	1143.53	-0.584468	0.604721	-0.966507	0.33379	0.551844
YLR414C	3646.78	-0.599195	0.620707	-0.965344	0.334373	0.55246
YBR270C	576.029	-0.56115	0.582088	-0.964029	0.335031	0.553029
YDR118W	459.494	-0.562129	0.583489	-0.963392	0.335351	0.553268
YDR034C-A	2.85046	-2.52255	2.62718	-0.960174	0.336968	0.555287
YNL253W	203.856	-0.636379	0.662964	-0.9599	0.337106	0.555287
YBR011C	771.248	-0.59746	0.622472	-0.959818	0.337147	0.555287
YDR387C	526.007	-0.557362	0.58128	-0.958852	0.337633	0.55573
YNR047W	2200.07	-0.580637	0.605961	-0.958208	0.337958	0.55612
YJL023C	230.205	-0.599851	0.626738	-0.957101	0.338516	0.55675
YKR083C	112.576	-0.666137	0.698612	-0.953514	0.34033	0.559006
YAL047W-A	8.84218	-1.2521	1.31436	-0.952632	0.340776	0.559449
YDR175C	327.783	-0.577025	0.606251	-0.951791	0.341203	0.559859
YLR371W	3266.95	-0.61867	0.650787	-0.950649	0.341783	0.56052
YPL022W	1842.95	-0.566193	0.597062	-0.948298	0.342978	0.561238
YDR417C	5.45432	-1.80496	1.90421	-0.947878	0.343192	0.561238
YDL245C	9.36096	-1.57379	1.66065	-0.947696	0.343284	0.561238
YML067C	560.145	-0.567518	0.599447	-0.946736	0.343773	0.561637
YIR019C	128.931	-0.697593	0.736867	-0.946701	0.343791	0.561637
YKL130C	302.932	-0.579972	0.612628	-0.946695	0.343794	0.561637
YBR302C	12.7547	-1.17304	1.23933	-0.946513	0.343887	0.561643
YNL304W	202.826	-0.589183	0.623132	-0.945519	0.344394	0.562326
YLR310C	3165.31	-0.560013	0.593182	-0.944082	0.345128	0.563234
YBL105C	3046.29	-0.608982	0.645763	-0.943042	0.34566	0.563666
YJR021C	353.525	-0.554792	0.589117	-0.941736	0.346328	0.564465
YNL271C	5541.38	-0.608052	0.646086	-0.941133	0.346637	0.564492
YMR025W	75.6391	-0.673151	0.715704	-0.940544	0.346939	0.564682
YFL059W	26.6185	-0.944557	1.00489	-0.939964	0.347236	0.564852
YHL043W	18.4726	-1.0611	1.12939	-0.939534	0.347457	0.564996
YKL002W	422.476	-0.561848	0.59818	-0.939262	0.347596	0.565078
YHR012W	347.101	-0.593181	0.632119	-0.938402	0.348038	0.565216
YNL315C	240.306	-0.587938	0.629554	-0.933897	0.350357	0.567817
YOR147W	1702.08	-0.573369	0.614281	-0.933399	0.350614	0.568088
YER147C-A	0.938287	-3.69569	3.95961	-0.933348	0.35064	NA
YER090C-A	2.27164	-2.25023	2.41379	-0.932242	0.351212	0.56862
YML054C-A	2.27164	-2.25023	2.41379	-0.932242	0.351212	0.56862
YNL121C	1691.85	-0.608705	0.653243	-0.93182	0.35143	0.568827
YAL021C	1479.77	-0.55068	0.591532	-0.930939	0.351885	0.569105
YPL269W	423.377	-0.575629	0.618429	-0.930793	0.351961	0.569105
YOR255W	55.39	-0.759419	0.816675	-0.929891	0.352428	0.569714
YJR103W	882.614	-0.670498	0.722443	-0.928099	0.353356	0.570781
YMR203W	1142.9	-0.57609	0.621139	-0.927473	0.353681	0.571012
YBR300C	19.3026	-1.18115	1.27629	-0.925455	0.354729	0.572412
YER032W	578.845	-0.537154	0.580624	-0.925133	0.354897	0.572429
YJR149W	356.437	-0.591098	0.638964	-0.925088	0.35492	0.572429
YOL004W	4385.92	-0.569063	0.61607	-0.923699	0.355643	0.573303
YLR307C-A	4977.04	-0.542197	0.587233	-0.923308	0.355847	0.573485
YJL052C-A	0.922573	-3.67368	3.98433	-0.922032	0.356512	NA
YGL065C	308.797	-0.546917	0.593881	-0.92092	0.357092	0.574706
YJR142W	83.1477	-0.663752	0.721589	-0.919848	0.357652	0.575077
YDR409W	1231.78	-0.548422	0.596941	-0.91872	0.358242	0.575587
YDR314C	525.001	-0.559946	0.609744	-0.918329	0.358447	0.57577
YOR195W	1921.3	-0.556752	0.60702	-0.917189	0.359043	0.576582
YDR251W	1975.25	-0.559721	0.611518	-0.915298	0.360035	0.577881
YPL002C	301.044	-0.558029	0.609814	-0.915082	0.360149	0.577884
YOL159C-A	121.492	-0.614045	0.671478	-0.914468	0.360471	0.578141
YML078W	196.944	-0.575846	0.630419	-0.913434	0.361014	0.578866
YKL192C	505.583	-0.566764	0.620877	-0.912843	0.361325	0.579218
YHR147C	129.701	-0.581525	0.637842	-0.911707	0.361923	0.579871
YJL153C	3988.84	-0.7513	0.824276	-0.911466	0.36205	0.579871
YNL167C	1104.15	-0.539638	0.592116	-0.911373	0.362099	0.579871
YCR104W	11.5316	-1.17629	1.29267	-0.909976	0.362835	0.580904
YCL057C-A	123.051	-0.594727	0.65555	-0.907218	0.364291	0.582793
YBR111W-A	126.784	-0.609872	0.67314	-0.906011	0.36493	0.583511
YPR204W	96.6764	-0.616239	0.680695	-0.905308	0.365302	0.583511
YJL015C	7.0162	-1.35106	1.49555	-0.903391	0.366318	0.584504
YOR149C	603.154	-0.526444	0.582813	-0.903281	0.366377	0.584504
YFR041C	192.891	-0.558519	0.619177	-0.902034	0.367039	0.584971
YEL053C	550.14	-0.53991	0.59881	-0.901637	0.36725	0.584988
YJL159W	40275	-0.504919	0.560522	-0.900802	0.367694	0.585123
YGR122C-A	7.88532	-1.2934	1.43617	-0.90059	0.367806	0.585123
YDR168W	709.879	-0.547841	0.608318	-0.900583	0.36781	0.585123
YLR376C	199.97	-0.70737	0.785863	-0.900118	0.368057	0.585269
YGR031C-A	20.4379	-1.08051	1.2017	-0.899153	0.368571	0.585791
YDR525W	8.90067	-1.21446	1.3519	-0.898331	0.369009	0.586341
YJL137C	474.402	-0.538846	0.600597	-0.897183	0.369621	0.587165
YPL056C	107.507	-0.649756	0.725665	-0.895394	0.370576	0.588388
YGR276C	615.462	-0.518321	0.579176	-0.894929	0.370825	0.588635
YDR248C	117.172	-0.625186	0.700706	-0.892223	0.372273	0.590523
YDR128W	1174.12	-0.542396	0.60795	-0.892172	0.372301	0.590523
YOL026C	53.2793	-0.668546	0.749873	-0.891546	0.372636	0.590622
YIL016W	82.4772	-0.640209	0.718709	-0.890777	0.373049	0.59098
YHR006W	3639.3	-0.507157	0.570762	-0.888562	0.374239	0.592568
YKL134C	717.487	-0.550133	0.620522	-0.886565	0.375313	0.594013
YDR298C	432.043	-0.519277	0.587406	-0.884017	0.376687	0.595402
YNL081C	230.753	-0.557197	0.630884	-0.8832	0.377128	0.595951
YMR113W	295.672	-0.529066	0.599187	-0.882973	0.377251	0.595996
YIL074C	814.036	-0.530829	0.601537	-0.882454	0.377531	0.59629
YOR093C	1165.28	-0.510345	0.578492	-0.8822	0.377669	0.596319
YNR056C	141.255	-0.597697	0.677606	-0.882072	0.377738	0.596319
YGR005C	778.219	-0.505501	0.573232	-0.881843	0.377861	0.596366
YPL265W	7456.35	-0.70119	0.797908	-0.878786	0.379517	0.598383
YLR177W	1396.58	-0.606026	0.690267	-0.877959	0.379966	0.598857
YDR457W	9263.62	-0.548394	0.624678	-0.877882	0.380008	0.598857
YGR164W	2.76862	-1.92337	2.19173	-0.877558	0.380184	0.598986
YER014C-A	8.46655	-1.25335	1.4289	-0.877141	0.38041	0.599193
YLR228C	1333.05	-0.525243	0.599188	-0.876592	0.380709	0.599514
YGL052W	6.07987	-1.33196	1.52471	-0.873586	0.382344	0.601192
YMR044W	1314.39	-0.513464	0.589128	-0.871566	0.383445	0.602475
YPL111W	401.218	-0.571554	0.65688	-0.870103	0.384244	0.603184
YIL117C	2010.15	-0.51752	0.594821	-0.870043	0.384277	0.603184
YHR028C	1569.31	-0.540738	0.621715	-0.869752	0.384436	0.603283
YAL060W	352.877	-0.512284	0.590728	-0.867208	0.385828	0.605018
YLR171W	7.56164	-1.23657	1.42693	-0.86659	0.386166	0.605399
YMR244C-A	96.3731	-0.719312	0.834667	-0.861795	0.3888	0.608379
YML104C	490.626	-0.501564	0.582166	-0.861548	0.388937	0.608379
YKL174C	822.547	-0.501946	0.582967	-0.861021	0.389227	0.608379
YER091C	4317.57	-0.549045	0.637879	-0.860736	0.389383	0.608379
YBR076C-A	451.31	-0.51132	0.594321	-0.860343	0.3896	0.608379
YOR291W	3291.08	-0.494635	0.57519	-0.859951	0.389816	0.608379
[truncated: 4,573 more rows]

## Sheet: Significant and increased loci
baseMean	log2FoldChange	lfcSE	stat	pvalue
YDL026W	1.03675	-0.507942	3.80136	-0.133621
YJL007C	1.03675	-0.507942	3.80136	-0.133621
YJL175W	1.05246	-0.542967	3.48816	-0.15566
YDR290W	1.11727	-2.28665	3.4693	-0.659112
YIL142C-A	1.13298	-2.30971	3.74887	-0.616108
YLR013W	1.13866	-2.15853	3.44569	-0.626445
YDR095C	1.17009	-2.19497	3.70465	-0.59249
YBR223W-A	1.17862	-0.0771021	3.29795	-0.0233788
YNL019C	1.19434	-0.10625	3.05329	-0.0347986
YCL023C	1.20915	-4.06563	3.93103	-1.03424
YDL041W	1.20915	-4.06563	3.93103	-1.03424
YDR510C-A	1.21573	0.00118957	3.26349	0.000364508
YLR458W	1.21573	0.00118957	3.26349	0.000364508
YCL069W	1.22486	-4.08312	3.57268	-1.14287
YML133W-A	1.23144	-0.0298722	3.02369	-0.00987939
YPR136C	1.23144	-0.0298722	3.02369	-0.00987939
YMR247W-A	1.25283	0.0800308	3.52061	0.0227321
YBR126W-B	1.25629	-4.11624	3.54174	-1.16221
YAL069W	1.28426	0.0186858	3.48713	0.0053585
YOR024W	1.31197	-1.38539	3.45828	-0.4006
YNL067W-A	1.33336	-1.2487	2.94423	-0.424117
YHR054W-A	1.33903	-1.0957	3.4297	-0.319473
YDR543C	1.38617	-1.16036	3.38662	-0.342632
YIR021W-A	1.38813	-2.65804	3.4807	-0.763652
YFR056C	1.44095	-2.57502	3.1705	-0.81218
YMR158W-B	1.45666	-2.59221	3.13418	-0.82708
YBL044W	1.55857	-4.42831	3.24046	-1.36657
YDR354C-A	1.57083	-0.531169	2.95146	-0.179968
YOR248W	1.65989	-0.26656	2.868	-0.0929429
YJR071W	1.78692	-0.113044	2.81343	-0.0401801
YPR159C-A	1.79037	-2.93848	2.95583	-0.994132
YER172C-A	1.79891	-1.08926	2.58408	-0.421528
YPR002C-A	1.79891	-1.08926	2.58408	-0.421528
YLR261C	1.81462	-1.10449	2.55097	-0.432967
YPL185W	1.84515	-4.67364	3.05076	-1.53196
YER068C-A	1.87657	-4.69576	3.03515	-1.54713
YMR031W-A	1.89229	-4.70678	3.07122	-1.53254
YMR323W	1.90741	0.0515223	2.48759	0.0207117
YBL107W-A	1.9288	0.117283	2.4808	0.0472765
YPL080C	2.03984	-3.27167	2.78812	-1.17343
YHL005C	2.0521	-0.582209	2.45259	-0.237385
YNL120C	2.07695	-3.18812	2.77104	-1.15051
YGR265W	2.1012	-1.40714	2.44576	-0.575341
YGL074C	2.10837	-3.20823	2.81178	-1.141
YNL013C	2.10837	-3.20823	2.81178	-1.141
YNL324W	2.1383	-1.33677	2.43303	-0.549427
YLR366W	2.15401	-1.34977	2.39078	-0.564572
YKL083W	2.1754	-1.26405	2.60681	-0.484902
YLR302C	2.20116	-1.38561	2.61432	-0.530008
YJR037W	2.21029	-4.93079	2.9227	-1.68707
YER090C-A	2.27164	-2.25023	2.41379	-0.932242
YML054C-A	2.27164	-2.25023	2.41379	-0.932242
YDR193W	2.27732	-2.1328	2.55601	-0.834426
YHR137C-A	2.29303	-2.14402	2.53977	-0.84418
YLR076C	2.31728	-0.95649	2.31686	-0.412839
YLR012C	2.3701	-0.914789	2.29173	-0.39917
YBR226C	2.37356	-3.50696	2.67475	-1.31114
YOL037C	2.49059	-0.72784	2.23693	-0.325374
YAL034C-B	2.51916	-1.64983	2.50009	-0.659909
YMR141W-A	2.53709	0.048721	2.44754	0.0199062
YBL012C	2.5528	0.0338085	2.4697	0.0136893
YNR072W	2.67239	-1.1747	2.19237	-0.535815
YML057C-A	2.69378	-1.10686	2.41051	-0.459179
YCR108C	2.7252	-1.12956	2.34673	-0.481333
YDR230W	2.73374	-0.318864	2.3468	-0.135872
YGR164W	2.76862	-1.92337	2.19173	-0.877558
YHR131W-A	2.7966	-0.369508	2.14995	-0.171868
YDR034C-A	2.85046	-2.52255	2.62718	-0.960174
YBR174C	2.88189	-2.54761	2.36199	-1.07858
YNR001W-A	2.88189	-2.54761	2.36199	-1.07858
YLR162W	2.89851	-0.914344	2.13036	-0.429197
YLR339C	2.89851	-0.914344	2.13036	-0.429197
YJL127W-A	2.97272	-0.824538	2.33263	-0.35348
YLR161W	3.00265	-0.0664124	2.14498	-0.0309618
YDR406W-A	3.0284	-0.146702	2.26694	-0.0647135
YBR209W	3.03035	-0.64267	2.0278	-0.31693
YAR064W	3.10456	-0.56783	2.074	-0.273785
YIL177C	3.16655	-0.525033	2.04803	-0.25636
YHR056W-A	3.24644	-0.403857	1.97104	-0.204895
YCR049C	3.25276	-0.998922	2.17946	-0.458335
YHL006W-A	3.29358	-0.433874	2.00911	-0.215954
YDL034W	3.33981	-1.61798	2.03695	-0.794313
YKL036C	3.38546	-0.83417	1.94582	-0.428698
YMR307C-A	3.56699	-4.13262	2.35865	-1.75211
YEL075W-A	3.57383	-0.110096	2.15824	-0.051012
YDR187C	3.63297	-0.617566	1.91718	-0.322123
YKL131W	3.70691	-2.43562	1.97805	-1.23132
YBR124W	3.72262	-2.4423	2.00349	-1.21902
YER067C-A	3.77421	0.0720113	2.16735	0.0332256
YMR030W-A	3.77962	-1.41171	1.99512	-0.707578
YDR524W-C	3.78457	-5.70696	2.46675	-2.31356
YHR180C-B	3.81195	-0.444324	1.8605	-0.23882
YKR033C	3.83244	-1.37431	2.09447	-0.65616
YHL034W-A	3.83589	-3.02913	2.11765	-1.43042
YDR464C-A	4.10856	-0.675758	1.85659	-0.363979
YHR055C	4.25581	-4.32548	2.24271	-1.92868
YLR269C	4.29258	0.00378303	2.08406	0.00181522
YJL028W	4.34663	-2.03625	2.08009	-0.978926
YFL063W	4.45735	-0.381725	2.00941	-0.189969
YOR325W	4.49359	-0.307491	1.70962	-0.17986
YBR064W	4.58039	-2.20189	1.80733	-1.21831
YLR111W	4.63516	-2.73935	1.81894	-1.50602
YAL016C-B	4.68452	-1.40977	1.92159	-0.733646
YKL123W	4.69234	-2.82872	1.93838	-1.45933
YNL103W-A	4.73303	-0.444015	1.91711	-0.231606
YEL010W	4.74678	-0.140221	1.69897	-0.0825329
YMR007W	4.77077	-0.862814	1.69633	-0.508636
YOR394C-A	4.79392	-0.162283	1.77745	-0.0913011
YDR455C	4.85275	-3.40662	2.04142	-1.66875
YJR114W	4.87295	-0.0403021	1.65769	-0.0243121
YBL108W	4.88267	-2.31507	1.7614	-1.31433
YLL067C	4.89212	-0.829805	1.66692	-0.497809
YBR141W-A	4.9626	-1.14312	1.64635	-0.694337
YMR119W-A	5.0003	-2.86294	1.8006	-1.58999
YER119C-A	5.0582	-1.05466	1.66913	-0.631865
YML066C	5.07046	-0.279045	1.69936	-0.164205
YDR118W-A	5.19095	-0.214589	1.60829	-0.133427
YKL153W	5.27057	-1.22758	1.61643	-0.759442
YCR087W	5.27083	-0.142055	1.70781	-0.0831797
YDR029W	5.35285	-0.904814	1.75408	-0.515834
YPR077C	5.38564	-0.116109	1.58087	-0.0734461
YIL066W-A	5.43247	-2.09365	1.70428	-1.22847
YDR417C	5.45432	-1.80496	1.90421	-0.947878
YIL156W-A	5.57345	-3.04335	1.71649	-1.77301
YAL045C	5.70932	-0.240885	1.55385	-0.155025
YGR068W-A	5.76964	-3.7693	1.89047	-1.99385
YML132W	6.02569	-2.3766	1.67784	-1.41646
YDL007C-A	6.03423	-1.81374	1.58687	-1.14297
YGL052W	6.07987	-1.33196	1.52471	-0.873586
YDL023C	6.10336	-3.85594	1.92217	-2.00603
YCR096C	6.26108	-0.512448	1.51566	-0.338103
YDL118W	6.27765	-0.556496	1.62323	-0.342832
YFR032C-B	6.28025	-1.16077	1.48953	-0.779283
YLR466W	6.2916	-1.09761	1.54122	-0.712171
YML100W-A	6.48493	-1.7835	1.59688	-1.11687
YIL173W	6.60047	-0.608839	1.50137	-0.405522
YOL038C-A	6.73922	-1.78509	1.50093	-1.18932
YIL032C	6.77437	-1.47546	1.46008	-1.01053
YJL064W	6.79726	-1.90991	1.5709	-1.21581
YML099W-A	6.85698	-5.10787	2.29013	-2.23038
YGR259C	6.95244	-1.99485	1.47221	-1.355
YJL015C	7.0162	-1.35106	1.49555	-0.903391
YCR085W	7.04899	-0.690355	1.4199	-0.4862
YLR416C	7.1609	-1.54821	1.47189	-1.05185
YAL031W-A	7.19741	-0.624179	1.42162	-0.439063
YBR206W	7.21312	-0.628553	1.4299	-0.439577
YOR300W	7.33075	-0.847409	1.44001	-0.588474
YFL032W	7.36218	-0.85554	1.49982	-0.57043
YOR268C	7.3921	-0.538607	1.40782	-0.382582
YJR038C	7.43149	-2.82796	1.61859	-1.74717
YLR171W	7.56164	-1.23657	1.42693	-0.86659
YIR020C-B	7.623	-0.908891	1.40121	-0.648646
YDL062W	7.6393	-1.83431	1.51611	-1.20988
YHR079C-A	7.65951	-0.13141	1.40758	-0.0933589
YDR522C	7.77232	-0.38523	1.50104	-0.256641
YGL041C-B	7.81333	-0.763376	1.453	-0.525378
YPR092W	7.83746	-2.44921	1.50492	-1.62747
YCL041C	7.86738	-1.95972	1.41592	-1.38407
YGR122C-A	7.88532	-1.2934	1.43617	-0.90059
YDR154C	8.06208	-1.80674	1.39843	-1.29198
YKL097C	8.10114	-2.04781	1.37654	-1.48765
YKL169C	8.11144	-1.19283	1.40917	-0.846474
YOR333C	8.12761	-1.07814	1.39842	-0.770966
YGL034C	8.13388	-1.95312	1.48877	-1.3119
YFL058W	8.18943	-6.82099	2.05168	-3.32458
YAL068C	8.20649	0.0431213	1.33086	0.032401
YMR075C-A	8.34016	-1.60758	1.44956	-1.10901
YHR073C-B	8.44197	-0.113931	1.5248	-0.0747185
YER014C-A	8.46655	-1.25335	1.4289	-0.877141
YOR231C-A	8.49843	-1.14536	1.36562	-0.838707
YIL012W	8.53866	-0.223253	1.42783	-0.156358
YLR374C	8.62864	-2.65481	1.38118	-1.92214
YAL047W-A	8.84218	-1.2521	1.31436	-0.952632
YJL086C	8.84881	-0.378064	1.31742	-0.286973
YAR073W	8.89662	-0.0964766	1.37961	-0.0699303
YDR525W	8.90067	-1.21446	1.3519	-0.898331
YGL063C-A	9.05345	-1.19425	1.47935	-0.807278
YFL064C	9.16095	-0.175523	1.42726	-0.122978
YNL285W	9.16331	-0.450685	1.30274	-0.34595
YIL030W-A	9.18371	-1.92673	1.46244	-1.31748
YHL012W	9.19845	-0.274827	1.38617	-0.198263
YHR070C-A	9.22943	-0.56518	1.40251	-0.402979
YDL245C	9.36096	-1.57379	1.66065	-0.947696
YFR052C-A	9.46143	-7.02926	2.01143	-3.49467
YGL259W	9.56889	-3.18593	1.40301	-2.27079
YJL067W	9.62059	-0.110036	1.3707	-0.0802774
YCR050C	9.76502	-0.812469	1.33137	-0.610249
YPL152W-A	9.87012	-2.20329	1.28916	-1.70909
YDR442W	9.91167	-1.10642	1.3807	-0.801347
YDR215C	10.0106	-2.8984	1.39988	-2.07046
YCL042W	10.1214	-1.3292	1.32552	-1.00278
YBL077W	10.2932	-1.42294	1.24731	-1.14081
YDL022C-A	10.3252	-2.22269	1.3376	-1.66169
YKL037W	10.5646	-0.341764	1.36594	-0.250205
YJL075C	10.5762	-2.71698	1.41864	-1.9152
YLR379W	10.8639	-1.6611	1.29362	-1.28408
YBR051W	10.9246	-0.991611	1.57101	-0.631191
YHL045W	10.941	-0.390567	1.53201	-0.254938
YPL251W	11.0469	-3.06201	1.29213	-2.36975
YDR274C	11.1744	-2.47573	1.50323	-1.64695
YDR203W	11.3333	-0.127701	1.26162	-0.10122
YPL238C	11.3353	-0.258752	1.24638	-0.207603
YLR463C	11.3767	-0.284246	1.22402	-0.232224
YNR070W	11.4746	-1.4506	1.22644	-1.18278
YCR104W	11.5316	-1.17629	1.29267	-0.909976
YBL006W-A	11.5608	-1.60646	1.21942	-1.3174
YPR012W	11.6587	-0.473569	1.16738	-0.405668
YOL150C	11.6825	0.0388239	1.5816	0.0245472
YPL021W	11.7702	-1.19258	1.38945	-0.858307
YJR160C	11.8768	-1.49602	1.25574	-1.19135
YHR193C-A	12.0838	-1.0485	1.24101	-0.844879
YPR126C	12.1414	-0.999221	1.17104	-0.853274
YMR153C-A	12.1946	-0.218853	1.16538	-0.187795
YFL010W-A	12.21	-0.992533	1.19256	-0.832272
YML084W	12.3086	-1.56792	1.27243	-1.23223
YOL083C-A	12.4	0.0182616	1.24329	0.0146881
YML101C-A	12.5034	-0.287293	1.23114	-0.233355
YGL230C	12.7529	-1.85421	1.15891	-1.59995
YBR302C	12.7547	-1.17304	1.23933	-0.946513
YHR180W-A	12.8293	-1.4131	1.19213	-1.18535
YKL202W	12.8928	-0.2029	1.20667	-0.168148
YMR194C-A	13.1549	-0.559627	1.14689	-0.487953
YOR072W-A	13.2136	-0.12587	1.16627	-0.107925
YGR224W	13.2203	-1.15403	1.18485	-0.973986
YCR047W-A	13.307	-0.396837	1.21604	-0.326334
YFL061W	13.3979	-0.261555	1.27936	-0.204443
YMR279C	13.4635	-0.759314	1.15524	-0.65728
YDR048C	13.4947	-3.09068	1.21929	-2.53482
YJR157W	13.5094	-2.32706	1.19622	-1.94534
YML083C	13.5173	-1.83653	1.28535	-1.42882
YDR433W	13.5412	-0.75387	1.25981	-0.598399
YOL085W-A	13.5528	-2.55335	1.17754	-2.16838
YIR030C	13.5941	-0.128101	1.10056	-0.116397
YDR014W-A	13.6248	-0.87352	1.17507	-0.743377
YHL046C	13.6648	-1.74676	1.23235	-1.41743
YPL197C	13.7631	-0.817842	1.19787	-0.682746
YBR144C	13.7671	-0.766116	1.09031	-0.702659
YCR105W	14.1721	-0.947629	1.10236	-0.859637
YOR218C	14.4183	-1.21797	1.20709	-1.00901
YCL001W-B	14.638	-0.546131	1.11988	-0.487671
YPL102C	15.1793	-0.446127	1.08345	-0.411766
YFL040W	15.2472	-0.306592	1.12826	-0.271739
YAL037C-B	15.4126	-2.17407	1.18325	-1.83737
YFR012W-A	15.488	-0.0798734	1.1502	-0.0694428
YEL069C	15.5114	-0.586678	1.11936	-0.524118
YGL042C	16.1903	-0.211471	1.02934	-0.205443
YBR126W-A	16.3421	-3.2813	1.25269	-2.61941
YFL015C	16.5728	-0.516188	1.2805	-0.403113
YKL102C	16.675	-0.37993	1.39424	-0.2725
YLR338W	16.88	-0.322088	1.0585	-0.304286
YBR296C-A	17.0114	-4.72684	1.41347	-3.34415
YNL332W	17.1238	-4.87393	1.3761	-3.54185
YJL152W	17.1364	-2.39791	1.08458	-2.21091
YMR032W	17.6913	-1.51965	1.05561	-1.4396
YHR071C-A	17.7679	-0.502848	1.05628	-0.476057
YFL019C	17.9204	-0.814837	1.00073	-0.814246
YML133C	18.0606	-0.38846	1.00489	-0.38657
YGL188C	18.1624	-2.91369	1.13333	-2.57091
YLR428C	18.1857	-1.51093	1.07892	-1.40041
YIR030W-A	18.2418	-1.31495	1.01498	-1.29555
YDL196W	18.4205	-3.67044	1.28433	-2.85787
YHL043W	18.4726	-1.0611	1.12939	-0.939534
YHR185C	18.5148	-1.64255	1.00717	-1.63086
YIL156W-B	18.5617	-0.721481	1.00457	-0.7182
YCL048W	18.5869	-3.1863	1.11432	-2.85941
YHL049C	18.7091	0.0147647	1.02871	0.0143527
YPL027W	18.7388	-3.08909	1.0556	-2.92639
YGR107W	18.819	-2.07369	1.01912	-2.03478
YPR195C	18.9224	-0.74371	0.987742	-0.75294
YDL244W	19.0964	-4.54089	1.19847	-3.78891
YMR105W-A	19.1846	-4.95592	1.34342	-3.68904
YFL020C	19.28	-1.41259	1.01187	-1.39602
YBR300C	19.3026	-1.18115	1.27629	-0.925455
YNL334C	19.3577	-1.64615	1.03328	-1.59313
YER190W	19.5052	-0.426167	1.00008	-0.426132
YGR051C	19.8783	-1.65563	1.06951	-1.54803
YGR290W	19.9627	-1.9042	1.14577	-1.66194
YNR062C	19.9845	-1.78007	1.18502	-1.50215
YCL021W-A	20.0979	-1.31053	0.975706	-1.34316
YCL026C-B	20.2299	-1.53974	0.999756	-1.54011
YFL065C	20.4163	-0.239689	0.997314	-0.240334
YGR031C-A	20.4379	-1.08051	1.2017	-0.899153
YIL014C-A	20.5859	-1.35498	0.969968	-1.39693
YGR292W	20.7009	-3.38083	1.18293	-2.85801
YGL015C	20.8836	-0.0995614	0.979162	-0.10168
YIR017W-A	20.9574	-2.52767	1.0862	-2.32707
YLR465C	21.0259	-1.12975	1.0511	-1.07483
YLR331C	21.0477	-3.31757	1.0923	-3.03723
YBL100W-C	21.2487	-4.11449	1.15675	-3.55693
YPL035C	21.5048	0.0350626	1.38961	0.0252319
YHR219W	21.6093	-0.595708	0.994873	-0.598778
YGR025W	21.6818	-2.75803	1.1637	-2.37006
YPL192C	21.7353	-0.187802	0.989737	-0.189749
YOR186C-A	21.816	-1.24367	1.10882	-1.12161
YLR285C-A	21.837	-1.33926	0.983719	-1.36143
YDL071C	22.1098	-0.148184	1.03691	-0.142909
YLR411W	22.1603	-0.164322	0.959805	-0.171204
YLR466C-B	22.1881	-0.402696	1.08019	-0.372802
YHR028W-A	22.1928	-0.0947192	0.933149	-0.101505
YFL060C	22.1931	-1.63816	0.953026	-1.7189
YER084W-A	22.7608	-1.59602	0.959609	-1.6632
YJR005C-A	22.8415	-4.73313	1.27519	-3.71171
YIL158W	22.8556	-0.238673	0.920837	-0.259191
YOR381W-A	23.0691	-0.0570032	0.921466	-0.0618614
YGR011W	23.3699	-0.197014	0.952309	-0.20688
YFL067W	23.6187	-0.0244774	1.00219	-0.0244239
YOR384W	23.653	-1.8568	1.028	-1.80622
YHL037C	23.734	-0.689374	0.92009	-0.749247
YJL215C	23.745	-0.350112	0.967333	-0.361935
YIL134C-A	23.8983	-0.0170764	0.923718	-0.0184865
YML116W-A	23.9603	-2.03204	1.05966	-1.91763
YLL020C	24.016	-0.705434	1.13461	-0.62174
YJL219W	24.1746	-0.143951	1.02974	-0.139794
YAR030C	24.3174	0.0111965	0.989059	0.0113204
YFR026C	24.3417	-1.33984	0.917326	-1.4606
YJL218W	24.5626	-0.486986	1.24034	-0.392625
YOR105W	24.6364	-0.683399	0.936036	-0.7301
YJR156C	24.6488	-2.8984	0.953345	-3.04024
YCR081C-A	24.665	-1.00397	0.963022	-1.04252
YIR041W	24.7172	-2.5025	1.03588	-2.41582
YBR299W	24.8421	-4.02564	1.11227	-3.6193
YEL067C	25.0016	-0.948647	0.935137	-1.01445
YOL163W	25.0521	-0.682098	0.900228	-0.757695
YDR501W	25.1477	-0.665852	0.907827	-0.733458
YLR299C-A	25.4546	-0.903021	0.925086	-0.976148
YOR192C-C	25.5552	-0.573595	0.903382	-0.634942
YFR007W	25.8694	-0.163292	0.926092	-0.176324
YIL100W	26.109	-2.14995	0.955655	-2.24971
YGL258W-A	26.1974	-2.98235	0.936115	-3.18588
YLR040C	26.257	-0.443718	1.31048	-0.338592
YIR018C-A	26.3988	-0.49889	0.968023	-0.51537
YLL066C	26.4589	-1.31303	1.00636	-1.30473
YML047W-A	26.6075	-2.26257	0.989322	-2.28699
YFL059W	26.6185	-0.944557	1.00489	-0.939964
YLR317W	26.7987	-1.2913	0.93461	-1.38164
YNL034W	26.8124	-1.56287	0.925686	-1.68834
YDR008C	26.8279	-0.725322	0.961148	-0.754641
YBR301W	26.8808	-0.267471	1.04005	-0.257172
YKL096C-B	27.061	-3.00014	1.114	-2.69312
YDL242W	27.1965	-1.81888	0.984663	-1.84721
YGR109C	27.3571	-3.28209	1.00261	-3.27356
YOL118C	27.3992	-1.24145	0.881176	-1.40886
YIL141W	27.4147	-1.12006	0.916999	-1.22144
YKL066W	28.1077	-1.71461	0.899591	-1.90599
YGL235W	28.1745	-0.789866	0.975486	-0.809716
YKL106C-A	28.1852	-0.878009	0.903639	-0.971637
YCR075W-A	28.2589	-1.30498	0.874827	-1.4917
YOL104C	28.2823	-0.3579	0.986559	-0.362776
YLL066W-A	28.3584	-0.597263	1.06867	-0.558887
YMR052C-A	28.4305	-1.8098	1.04927	-1.72482
YPR146C	28.4753	-0.180094	0.878201	-0.205072
YGL033W	28.5023	-0.89399	0.87875	-1.01734
YER181C	28.875	-1.45548	0.871772	-1.66957
YLR202C	29.1498	-0.477908	0.941661	-0.507516
YHL041W	29.1624	-0.569793	0.865514	-0.658329
YPL044C	29.8902	-3.80497	0.997367	-3.81502
YOL131W	30.0208	-1.56877	0.876156	-1.79051
YOL099C	30.3017	-0.350168	0.85508	-0.409515
YIL071W-A	30.5347	-2.29218	0.98528	-2.32643
YPL280W	31.0351	-1.40628	0.856888	-1.64114
YOL162W	31.1719	-0.309317	0.886646	-0.348862
YEL057C	31.2093	-1.25273	0.843245	-1.4856
YCL054W-A	31.3274	-0.416044	1.11693	-0.37249
YER091C-A	31.4078	-0.36081	0.836605	-0.431279
YFL041W-A	32.1186	-0.737528	0.918899	-0.802621
YGR190C	32.2901	-2.12019	0.981393	-2.16039
YPL222C-A	32.4562	-1.47687	0.915939	-1.61241
YIL165C	32.654	-0.565101	0.842371	-0.670846
YGL229C	32.8158	-3.28265	0.966896	-3.39504
YDL172C	32.8477	-0.921525	0.839428	-1.0978
YER175W-A	32.939	-1.30358	0.875961	-1.48818
YHL042W	33.7132	-1.37978	0.850636	-1.62206
YPR052C	33.7609	-1.04294	0.837824	-1.24482
YDL219W	33.93	-0.636647	0.833004	-0.764278
YAL046C	33.9674	-0.36267	0.8325	-0.43564
YNL057W	34.0004	0.00269273	0.895429	0.0030072
YDR402C	34.6285	-0.271813	0.903021	-0.301003
YHR180W	34.6606	-0.881367	0.856094	-1.02952
YLR347W-A	35.1592	-2.27879	0.89371	-2.54981
YOL106W	35.3579	-0.21925	0.847697	-0.258642
YLR252W	35.8695	-1.70949	0.973736	-1.75559
YGL053W	36.1751	-1.00614	0.809889	-1.24232
YAL042C-A	36.7832	-1.31244	0.977289	-1.34294
YBR180W	37.2038	-0.280702	0.871137	-0.322225
YJR150C	37.474	-1.58839	1.11791	-1.42086
YLR031W	37.556	-0.429092	0.822905	-0.521436
YLR400W	37.7001	-0.138248	0.862769	-0.160237
YDL094C	37.8119	-0.59842	0.8885	-0.673517
YER135C	38.5217	-2.25431	0.815892	-2.763
YJR112W-A	38.5222	0.00323952	0.794879	0.00407549
YPL256C	38.5444	-2.06597	0.824647	-2.50528
YOR214C	38.5541	-1.72472	0.856923	-2.01269
YGR137W	38.6224	-0.0260782	0.811127	-0.0321506
YCR064C	38.724	-0.671583	0.922956	-0.727643
YEL035C	39.0047	-0.127162	0.849551	-0.149682
YLR361C-A	39.2328	-0.847643	0.8156	-1.03929
YFL062W	39.278	-1.19812	0.885489	-1.35306
YIL132C	39.3092	-0.877761	0.839925	-1.04505
YNL335W	39.4022	-0.504607	0.85806	-0.588079
YNL318C	39.5274	-1.49394	0.837946	-1.78287
YAL019W-A	39.6731	-1.04781	0.889012	-1.17862
YMR199W	39.9811	-1.24405	0.873372	-1.42442
YKL138C-A	40.0717	-0.0205069	0.787177	-0.0260512
YLR434C	40.4386	-0.907157	0.843777	-1.07511
YCL001W-A	40.7969	-0.562652	0.887696	-0.633833
YML101C	40.9163	-1.81229	0.835964	-2.1679
YHR043C	41.1213	-1.84541	0.9041	-2.04115
YOR082C	41.6011	-1.33016	1.01052	-1.3163
YKL162C-A	41.9009	-0.574822	0.853482	-0.673502
YDR169C-A	42.0029	-0.940309	0.79188	-1.18744
YLL049W	42.1892	-1.19826	0.798057	-1.50148
YER011W	42.2809	-0.356727	1.16271	-0.306806
YNR032C-A	42.3041	-0.020711	0.78254	-0.0264665
YMR133W	42.7406	0.0273405	0.855642	0.0319532
YOL086W-A	42.7913	-0.851536	0.775451	-1.09812
YLR308W	42.9046	-2.65986	0.838728	-3.1713
YNL097W-A	43.6155	-1.31849	0.80504	-1.63779
YLR053C	43.7256	-1.70208	0.815362	-2.08752
YLR011W	43.7994	-1.65845	0.799661	-2.07395
YIL169C	43.9997	-2.22242	0.861639	-2.57929
YLR306W	44.2001	-1.04893	0.771633	-1.35936
YLR050C	44.8654	-0.0504592	0.784279	-0.0643384
YIL009C-A	45.5223	-0.0647618	0.834997	-0.0775593
YOR131C	45.811	-0.783905	0.780936	-1.0038
YGR050C	46.0177	-0.56785	0.937577	-0.605657
YGL182C	46.5954	-0.243972	0.7833	-0.311467
YLR408C	46.8484	-0.241457	0.798239	-0.302487
YNL097C-B	47.5549	-2.68734	0.843246	-3.1869
YLR315W	47.6955	-1.28028	0.784892	-1.63115
YEL009C-A	47.7591	-0.868974	0.818577	-1.06157
YCL033C	47.8813	-1.61986	0.8105	-1.99859
YIR022W	47.9115	-0.977636	0.805151	-1.21423
YER058W	47.943	-1.23216	0.776471	-1.58687
YLL025W	48.2258	-0.856998	0.785499	-1.09102
YPL278C	48.4599	-0.0702837	0.83912	-0.0837588
YBR224W	49.0206	-3.13638	0.824474	-3.8041
YKL084W	49.3554	-0.67534	0.808366	-0.835438
YHR050W-A	50.109	-3.20988	0.866004	-3.70654
YGR131W	50.1649	-1.82094	0.75838	-2.40109
YEL049W	50.2513	-3.42478	0.800342	-4.27914
YKL115C	50.3184	-0.430406	0.76383	-0.563484
YJL142C	50.4495	-5.35082	1.27346	-4.20178
YEL014C	50.5498	-0.337319	0.815191	-0.413792
YFL013W-A	50.7392	-0.516968	0.8797	-0.587664
YLR120W-A	50.8522	-0.61316	0.768455	-0.797912
YGL170C	51.1383	-1.77986	0.842447	-2.11273
YAR027W	52.2561	-0.811287	0.786428	-1.03161
YCL048W-A	52.5456	-2.77242	0.953389	-2.90797
YCR022C	52.5462	-0.520525	0.902036	-0.577056
YJR079W	52.971	-0.467039	0.812361	-0.574915
YGL138C	53.1314	-1.38641	0.879841	-1.57575
YLR147C	53.2214	-0.0410487	0.800367	-0.0512873
YBR230W-A	53.2321	-2.29793	0.776635	-2.95882
YOL026C	53.2793	-0.668546	0.749873	-0.891546
YPL171C	53.6171	-1.54392	0.859747	-1.79579
YJL135W	53.9235	-0.355433	0.779171	-0.456168
YPR047W	53.9342	-1.75964	0.7732	-2.27579
YDL021W	54.362	-1.3344	0.749625	-1.78009
YHL030W-A	54.4009	-4.25336	0.961521	-4.42357
YCR045W-A	54.5228	-0.157223	0.752475	-0.208941
YLR042C	54.7011	-0.606609	1.09053	-0.556251
YGR108W	54.7728	-1.36087	0.778744	-1.74751
YNL043C	55.1166	-0.00962154	0.761087	-0.0126418
YOL114C	55.1464	-2.48791	0.865167	-2.87565
YOR255W	55.39	-0.759419	0.816675	-0.929891
YJL199C	55.5265	-3.02605	0.804017	-3.76367
YBR109W-A	55.8064	-0.253664	0.737333	-0.344029
YDR540C	56.3	-1.75901	1.08539	-1.62062
YPR200C	57.2191	-0.532951	0.837296	-0.636514
YFL066C	57.2223	-0.507419	0.736657	-0.688814
YMR151W	57.725	-1.57294	0.772944	-2.035
YBL065W	57.8019	-3.35966	0.909155	-3.69537
YCR018C	58.0159	-0.0151594	1.24631	-0.0121635
YER067W	58.3087	-5.33881	0.948274	-5.63003
YNR068C	58.6058	-2.57592	0.773552	-3.32999
YLL042C	59.477	-0.408278	0.749135	-0.544999
YHR049C-A	59.7477	-2.47485	0.743907	-3.32682
YDL221W	60.2331	-1.51485	1.06397	-1.42377
YAL044W-A	60.6754	-0.941159	0.773315	-1.21705
YMR150C	61.8408	-1.15168	0.758671	-1.51802
YGR287C	62.0969	-0.111798	0.842129	-0.132756
YDR343C	62.2995	-1.36379	0.806502	-1.69099
YLR346C	62.6065	-1.87506	0.91427	-2.05088
YML036W	62.8087	-0.231003	0.742522	-0.311106
YER170W	62.8518	-1.51348	0.747216	-2.02549
YIR020C	63.0031	-1.36943	0.755234	-1.81326
YLR081W	63.0839	-4.16173	0.881242	-4.72257
YAL018C	63.0923	-0.565873	0.897361	-0.630597
YOL032W	63.1861	-2.20369	0.764649	-2.88196
YAR019W-A	63.8293	-0.256548	0.71383	-0.359397
YOL132W	64.3727	-0.109488	0.812402	-0.13477
YLR124W	64.4569	-1.74115	0.869745	-2.00191
YLR255C	64.5346	0.0159286	0.796386	0.0200011
YLL046C	64.7265	-1.90707	0.737226	-2.58682
YLR041W	65.1469	-0.894168	0.745182	-1.19993
YEL066W	65.2886	-1.20183	0.709825	-1.69314
YBR137W	65.2926	-1.19019	0.721516	-1.64957
YDL085C-A	65.8926	-0.387425	0.714227	-0.542439
YMR158C-A	66.5723	-3.09972	0.810288	-3.82546
YGR206W	66.9453	-0.75148	0.726201	-1.03481
YDR246W-A	66.9956	-0.84515	0.800409	-1.0559
YGR059W	67.4455	-1.45232	0.778457	-1.86565
YEL068C	67.7104	-0.288383	0.720354	-0.400335
YDR286C	67.8842	-1.17664	0.734417	-1.60214
YDL114W	67.9188	-0.179068	0.783213	-0.228633
YKR020W	68.0408	-0.375211	0.704126	-0.532876
YNL259C	68.1111	-0.943239	0.712104	-1.32458
YJR128W	68.3395	-2.35991	0.876233	-2.69325
YCR075C	68.5191	-3.30027	0.795674	-4.14777
YLR054C	68.6096	-0.494646	0.778085	-0.635723
YPR096C	68.6519	-1.04554	0.746956	-1.39973
YNL279W	68.8551	-0.924014	0.753003	-1.22711
YHR014W	69.11	-0.448754	0.705642	-0.635951
YEL074W	69.5516	-0.47776	0.844899	-0.565465
YJR115W	69.7054	-1.91163	0.75056	-2.54695
YOR284W	70.385	-0.822982	0.823717	-0.999108
YBR038W	70.7958	-2.0678	0.782261	-2.64337
YER066W	71.2251	-1.52044	0.935466	-1.62532
YDR220C	71.6144	-0.313768	0.729152	-0.430319
YMR144W	71.7118	-0.929213	0.759031	-1.22421
YER039C-A	72.3838	-0.946013	0.700983	-1.34955
YBR018C	72.706	-3.03748	0.771378	-3.93773
YLR307W	72.7538	-0.144668	0.745536	-0.194046
YNL072W	72.909	-0.826685	0.699139	-1.18243
YIL087C	73.9217	-2.37514	0.759239	-3.12832
YPR119W	74.1969	-0.0171984	0.812198	-0.0211751
YER088C-A	74.2197	-0.471186	0.726473	-0.648594
YGL032C	74.3413	-0.745027	0.766292	-0.972249
YHL018W	75.1568	-1.63021	0.695855	-2.34274
YFR043C	75.2443	-1.06689	0.694693	-1.53578
YLR099W-A	75.3132	-0.462263	0.705762	-0.654985
YMR025W	75.6391	-0.673151	0.715704	-0.940544
YJR034W	75.6734	-0.924494	0.762516	-1.21243
YCR099C	76.2306	-3.33007	0.787202	-4.23026
YHL022C	76.435	-2.02327	0.70186	-2.88272
YEL059W	76.5659	-0.243179	0.762443	-0.318947
YHR044C	76.7541	-0.0208756	0.775216	-0.0269288
YGL226W	76.7607	-0.267702	0.690818	-0.387514
YJL047C-A	76.7657	-0.456222	0.816792	-0.558554
YBL039W-B	76.8481	-5.61956	0.997501	-5.63363
YPL096C-A	76.9046	-0.218835	0.695985	-0.314425
YDL241W	77.0486	-0.173827	0.894951	-0.194231
YIL164C	77.4118	-0.531146	0.738182	-0.719533
YOL155C	78.2812	-1.98269	1.05071	-1.88701
YDR106W	78.4226	-0.120748	0.716289	-0.168574
YFR047C	78.5313	-0.905958	0.74674	-1.21322
YLL047W	79.1511	-1.68668	0.790805	-2.13286
YEL059C-A	79.4749	-0.906391	0.685736	-1.32178
YHR007C-A	79.6166	-3.39184	0.911867	-3.71967
YBR116C	80.1125	-5.87554	1.2446	-4.72083
YJR099W	80.2168	-2.40447	0.696373	-3.45284
YKL127W	80.2257	-1.54147	0.731718	-2.10665
YDR512C	80.8591	-2.38451	0.735074	-3.2439
YFR025C	81.0118	-0.291494	0.798326	-0.365131
YFR027W	81.7139	-1.20693	0.685013	-1.76191
YIL016W	82.4772	-0.640209	0.718709	-0.890777
YPR050C	82.7417	-1.67411	0.767461	-2.18137
YLR125W	82.7443	-0.750602	0.775517	-0.967873
YJR142W	83.1477	-0.663752	0.721589	-0.919848
YKR049C	83.383	-3.73419	0.817862	-4.5658
YGL198W	83.5831	-0.92795	0.68033	-1.36397
YBR099C	83.7222	-0.101302	0.794912	-0.127438
YGL242C	84.0122	-1.47827	0.683179	-2.16381
YOR365C	84.3636	-0.225419	0.71157	-0.316791
YBR096W	84.54	-0.739724	0.691629	-1.06954
YIL029C	84.6709	-3.9131	0.771185	-5.07414
YGR029W	84.6968	-0.17766	0.679734	-0.261367
YNL289W	85.31	-0.477488	0.706744	-0.675617
YGL249W	86.1947	-0.796541	0.695178	-1.14581
YDR253C	86.3036	-1.33905	0.705658	-1.8976
YOL008W	86.6111	-0.562445	0.680074	-0.827035
YOL085C	86.8385	-4.41524	0.837037	-5.27484
YHL044W	86.9895	-0.294914	0.737189	-0.400052
YMR315W-A	87.1248	-1.88274	0.797319	-2.36134
YDR016C	89.0439	-0.933673	0.709613	-1.31575
YOR386W	89.4096	-1.63327	0.792039	-2.0621
YFL017W-A	89.9569	-0.49242	0.676344	-0.728062
YDR003W-A	90.1673	-1.84122	0.740444	-2.48665
YDR304C	90.3019	-0.398632	0.674984	-0.59058
YFL017C	91.0776	-3.88138e-05	0.684562	-5.66988e-05
YIL098C	91.4955	-1.31092	0.695903	-1.88376
YDR218C	92.0801	-0.22268	0.705215	-0.315762
YJR135W-A	92.1019	-0.517142	0.68583	-0.754038
YPR202W	92.5877	-0.128488	0.767166	-0.167484
YDR451C	92.6501	-1.23136	0.737362	-1.66995
YKL053C-A	93.5752	-0.126183	0.724381	-0.174195
YHR140W	93.7599	-1.08297	0.815184	-1.3285
YDR139C	93.7881	-0.196786	0.72636	-0.270921
YAL034W-A	93.8094	-0.293763	0.701399	-0.418824
YER134C	93.9908	-0.928113	0.696304	-1.33291
YPL077C	94.0809	-0.161756	0.677048	-0.238913
YMR138W	94.1105	-0.132758	0.688152	-0.19292
YJR022W	94.8048	-0.175852	0.676571	-0.259917
YKR104W	95.0263	-0.38612	0.716258	-0.53908
YMR244C-A	96.3731	-0.719312	0.834667	-0.861795
YPR204W	96.6764	-0.616239	0.680695	-0.905308
YER019W	97.1819	-0.126473	0.743957	-0.17
YPL067C	97.5625	-0.842103	0.664623	-1.26704
YER097W	97.6643	-0.422744	0.809937	-0.521947
YBR089C-A	97.8073	-1.48995	0.737564	-2.0201
YLR311C	97.8302	-4.37948	0.857808	-5.10543
YHR189W	98.1085	-0.919255	0.688326	-1.33549
YDR403W	98.42	-1.01037	0.799083	-1.26441
YJL216C	98.5274	-1.65657	0.855187	-1.93708
YNL046W	98.5397	-0.398454	0.661836	-0.602044
YCL027W	98.5911	-0.911596	0.684662	-1.33145
YGR133W	98.6197	-0.46039	0.661494	-0.695985
YKL218C	98.6329	-1.53543	0.709528	-2.16402
YER093C-A	98.7274	-0.895898	0.740603	-1.20969
YLL002W	99.2726	-2.13999	0.775123	-2.76084
YER039C	99.4447	-0.563181	0.667708	-0.843454
YDR100W	99.8485	-2.33332	0.790657	-2.95111
YDL059C	100.221	-0.128218	0.747463	-0.171537
YOR186W	100.638	-0.278308	1.03951	-0.267731
YOL077W-A	100.64	-0.451016	0.666341	-0.676855
YFL011W	100.79	-2.25501	0.729553	-3.09095
YLR137W	101.271	-0.794122	0.777594	-1.02125
YDL157C	101.574	-0.409761	0.658808	-0.621974
YAL008W	101.965	-2.0977	0.66779	-3.14126
YFR023W	103.164	-1.24421	0.726194	-1.71333
YDR179C	103.356	0.00476202	0.665653	0.0071539
YOR074C	103.705	-1.5991	0.666756	-2.39833
YLR066W	104.349	-0.939415	0.65944	-1.42456
YOR379C	104.375	-0.338206	0.67256	-0.502864
YOL017W	104.827	-1.46162	0.704481	-2.07475
YMR175W-A	104.859	-2.96682	0.680793	-4.35789
YLR119W	105.321	-0.33899	0.66475	-0.509952
YOR034C-A	105.461	-1.74126	0.78364	-2.22202
YER106W	105.717	-0.123642	0.658371	-0.1878
YJL058C	105.854	-0.888663	0.697891	-1.27335
YLR351C	106.001	-0.372108	0.671126	-0.554453
YHR191C	106.127	-0.434751	0.676941	-0.642229
YLL009C	106.139	-0.602285	0.758435	-0.794115
YEL008W	106.33	-3.52453	0.755019	-4.66813
YOR357C	106.616	0.000919252	0.656776	0.00139964
YGR022C	106.748	-1.28954	0.840321	-1.53458
YMR074C	106.801	-0.0464192	0.674402	-0.0688302
YPL241C	106.882	-0.306739	0.679943	-0.451124
YOR364W	107.085	-0.137362	0.761207	-0.180453
YDR031W	107.177	-2.28795	0.695193	-3.2911
YNR057C	107.293	-0.97697	0.719685	-1.3575
YNR034W-A	107.438	-2.8229	0.891271	-3.16727
YPL056C	107.507	-0.649756	0.725665	-0.895394
YAL030W	107.553	-2.42315	0.708735	-3.41898
YPR015C	107.738	-1.98682	0.687651	-2.88928
YKR053C	107.742	-0.970306	0.682746	-1.42118
YOR125C	107.95	-0.84137	0.655393	-1.28376
YJL225C	108.096	-1.22092	0.712574	-1.71339
YIR039C	108.18	-1.89206	0.781012	-2.42257
YDL104C	108.194	-1.45803	0.663094	-2.19883
YNL336W	108.256	-1.58392	0.874522	-1.81119
YBR210W	108.289	-0.371158	0.679053	-0.546581
YER188C-A	108.473	-0.293158	0.68919	-0.425366
YDR424C	108.671	-0.967184	0.692454	-1.39675
YDR516C	108.834	-3.13893	0.712061	-4.40823
YGL161C	109.196	-2.42142	0.670926	-3.60907
YER076C	109.41	-0.694164	0.709889	-0.977849
YPR020W	109.712	-0.56621	0.689331	-0.82139
YMR262W	109.843	-3.68506	0.758147	-4.86062
YDL243C	109.946	-0.879633	0.77434	-1.13598
YLR049C	110.239	-3.00594	0.69871	-4.30213
YPR150W	111.959	-0.0405806	0.721989	-0.0562067
YDL227C	112.066	-0.199266	0.703151	-0.28339
YKR083C	112.576	-0.666137	0.698612	-0.953514
YNR067C	112.679	-0.53968	0.659047	-0.81888
YCR044C	113.056	-0.436517	0.661518	-0.659872
YBR194W	113.056	-0.0357879	0.686815	-0.0521071
YLR415C	113.205	-1.55678	0.960461	-1.62087
YIL037C	113.305	-1.72691	0.705408	-2.4481
YAL055W	113.646	-1.57172	0.705682	-2.22723
YFR049W	113.826	-4.77073	0.78545	-6.07389
YOL157C	114.363	-0.459966	0.79799	-0.576406
YMR286W	114.528	-0.0246721	0.650895	-0.0379049
YKL003C	114.692	-0.0292281	0.647362	-0.0451496
YKR070W	114.991	-0.873387	0.678388	-1.28744
YDL127W	115.603	-0.234398	0.752265	-0.31159
YDR379C-A	115.934	-3.8605	0.836428	-4.61547
YOR111W	116.12	-0.70071	0.65935	-1.06273
YBR176W	116.466	-0.266833	0.676236	-0.394585
YMR101C	116.859	-2.2617	0.673792	-3.35667
YJL078C	116.981	-0.207922	0.682178	-0.304792
YBL091C-A	117.113	-1.29551	0.698492	-1.85472
YDR248C	117.172	-0.625186	0.700706	-0.892223
YIR017C	117.451	-2.23315	0.73851	-3.02387
YOR351C	117.524	-3.379	0.845172	-3.99801
YNL122C	119.129	-0.352798	0.647859	-0.54456
YPR071W	119.492	-0.116593	0.674444	-0.172873
YLR239C	119.855	-1.15172	0.653866	-1.7614
YLR190W	120.144	-1.10912	0.687452	-1.61338
YGL021W	120.506	-0.870037	0.648121	-1.3424
YMR210W	120.634	-2.06942	0.699058	-2.96029
YOL159C-A	121.492	-0.614045	0.671478	-0.914468
YNR069C	121.53	-3.49586	0.679646	-5.14365
YEL004W	122.135	-1.8457	0.671754	-2.74759
YNL274C	122.586	-3.18523	0.742638	-4.28908
YDR201W	122.931	-0.7815	0.66985	-1.16668
YCL057C-A	123.051	-0.594727	0.65555	-0.907218
YPL124W	123.751	-0.531752	0.678428	-0.783799
YER010C	123.791	-0.912972	0.658243	-1.38698
YLR390W	124.151	-0.099499	0.704333	-0.141267
YGR053C	124.16	-2.7351	0.716761	-3.81592
YCR090C	124.602	-0.177356	0.656306	-0.270234
YHR038W	124.65	-0.66157	0.681079	-0.971355
YOR368W	126.125	-0.298175	0.671313	-0.444167
YFR042W	126.528	-0.528049	0.657232	-0.803445
YBR111W-A	126.784	-0.609872	0.67314	-0.906011
YGL047W	127.197	-3.27705	0.747227	-4.38561
YLR268W	127.213	-0.713575	0.647475	-1.10209
YOR288C	127.341	-1.75681	0.660035	-2.66169
YAR023C	127.4	-0.607906	0.711852	-0.853977
YPR147C	127.457	-0.646051	0.639444	-1.01033
YLR183C	127.973	-4.04426	0.730225	-5.53837
YPL113C	128.008	-3.67909	0.75286	-4.88681
YOL096C	128.469	-3.24775	0.696075	-4.66581
YDR476C	128.51	-0.721536	0.649205	-1.11141
YIR019C	128.931	-0.697593	0.736867	-0.946701
YPL196W	129.325	-1.74562	0.722717	-2.41536
YOR003W	129.332	-1.04785	0.737081	-1.42162
YKL069W	129.647	-0.894663	0.653782	-1.36844
YHR147C	129.701	-0.581525	0.637842	-0.911707
YDR305C	129.719	-1.39119	0.695386	-2.0006
YNL314W	130.486	-0.356931	0.669757	-0.532926
YKL053W	130.608	-0.448341	0.703952	-0.636891
YNL269W	130.93	-1.2558	0.720141	-1.74383
YGR230W	131.045	-0.803647	0.670834	-1.19798
YBR254C	131.687	-0.337155	0.654008	-0.515522
YJL068C	132.018	-2.70692	0.700657	-3.8634
YDR063W	132.157	-0.412458	0.720813	-0.572213
YPR011C	132.391	-1.07852	0.647676	-1.66522
YOR008W-B	132.609	-0.00253188	0.694028	-0.00364809
YJL214W	132.684	-2.27867	0.815971	-2.79259
YPL257W	132.772	-2.08427	0.680762	-3.06168
YDR038C	132.845	-0.0664625	0.653743	-0.101665
YDL086W	133.312	-0.713181	0.651078	-1.09538
YER145C-A	134.038	-1.88918	0.682448	-2.76825
YBR184W	134.596	-0.87972	0.663061	-1.32676
YBR188C	134.721	-0.269226	0.65905	-0.408506
YFR018C	135.408	-0.233309	0.649217	-0.359369
YDR342C	135.595	-2.644	0.744393	-3.55188
YKL194C	135.952	-1.6773	0.640562	-2.61849
YJL003W	136.46	-0.92134	0.67005	-1.37503
YIL065C	136.711	-0.275308	0.639793	-0.430308
YGR269W	138.559	-0.679353	0.661757	-1.02659
YDR374W-A	138.759	-1.12825	0.639091	-1.7654
YIR036C	139.42	-4.36152	0.740419	-5.89061
YLR456W	139.533	-0.184411	0.687086	-0.268396
YDL018C	139.63	-2.90333	0.730975	-3.97186
YOR376W-A	139.655	-1.88422	0.737725	-2.55409
YPL209C	140.292	-0.143171	0.634796	-0.225538
YNL196C	140.816	-1.80134	0.847208	-2.1262
YDR260C	141.166	-0.728453	0.639796	-1.13857
YNR056C	141.255	-0.597697	0.677606	-0.882072
YKL067W	141.751	-1.81004	0.651387	-2.77875
YLR218C	141.811	-2.19082	0.734846	-2.98133
YDL142C	141.84	-1.69293	0.694134	-2.43891
YMR087W	142.352	-1.32827	0.685735	-1.93701
YJR102C	142.5	-0.447478	0.709927	-0.630315
YKL219W	142.81	-0.317432	0.768228	-0.4132
YJR025C	142.983	-1.08931	0.678839	-1.60466
YLR037C	143.874	-3.87889	0.691822	-5.60677
YPR007C	143.88	-1.45539	0.707229	-2.05788
YIL015W	143.886	-0.134399	0.656961	-0.204577
YLR348C	144.005	-1.21736	0.65129	-1.86916
YLR070C	144.105	-4.95786	0.841768	-5.88982
YJR087W	144.566	-0.188713	0.712626	-0.264814
YJR057W	144.998	0.0299052	0.663177	0.0450939
YML079W	145.019	-0.75617	0.637046	-1.18699
YIL059C	145.217	-1.77403	0.702545	-2.52515
YHR061C	145.386	-0.190802	0.803519	-0.237458
YGL250W	146.509	-3.68484	0.703488	-5.23796
YOR049C	146.699	-0.33961	0.642755	-0.528365
YGR182C	147.032	-1.91119	0.730225	-2.61727
YBL019W	147.233	-1.07489	0.632473	-1.6995
YGL039W	148.137	-0.534239	0.68296	-0.782241
YPL099C	148.229	-1.05381	0.648507	-1.62498
YOR055W	148.656	-4.05145	0.776025	-5.22078
YBR145W	148.8	-1.12165	0.637152	-1.7604
YIL082W	149.097	-0.143593	0.669468	-0.214489
YCR071C	149.265	-0.163629	0.631645	-0.259052
YER185W	149.482	-1.82176	0.649139	-2.80643
YPL246C	149.937	-0.464492	0.717842	-0.647067
YHR051W	150.205	-2.35125	0.723105	-3.2516
YJR067C	150.331	-0.235482	0.643464	-0.36596
YGL183C	150.637	-0.86624	0.715079	-1.21139
YDR391C	151.163	-0.412769	0.630326	-0.65485
YGL220W	151.286	0.0127036	0.639102	0.0198773
YDR461C-A	151.99	-1.53108	0.677481	-2.25996
YHR076W	152.669	-0.877365	0.642209	-1.36617
YOR391C	153.051	-2.49675	0.673668	-3.7062
YDR084C	153.565	-1.32826	0.653236	-2.03336
YDL248W	153.984	-0.89965	0.736221	-1.22198
YGL087C	154.306	-1.35136	0.682708	-1.97941
YPR182W	155.609	-0.754417	0.639878	-1.179
YPL272C	155.662	-0.520289	0.679477	-0.76572
YOR390W	155.708	-0.187551	0.636018	-0.294883
YGR174C	155.716	-4.70721	0.755433	-6.23115
YOL033W	155.803	-0.717234	0.650517	-1.10256
YLR201C	155.895	-0.829778	0.646455	-1.28358
YOR279C	155.926	-0.280036	0.700401	-0.399822
YFL029C	156.045	-0.645524	0.629895	-1.02481
YPR131C	156.657	-0.292621	0.66287	-0.441445
YHR001W-A	156.846	-2.90347	0.718875	-4.03891
YDR284C	157.043	-2.07656	0.642104	-3.23399
YML107C	157.886	-0.51283	0.688041	-0.745349
YLR104W	157.931	-0.103531	0.63854	-0.162137
YKR073C	158.451	-0.557563	0.695986	-0.801113
YGR174W-A	158.546	-4.97818	0.798787	-6.23217
YGL154C	158.776	-1.28906	0.636881	-2.02402
YJR098C	159.209	-1.35373	0.665721	-2.03349
YJL160C	159.726	-0.246648	0.737642	-0.334374
YOL009C	160.128	-0.925589	0.635008	-1.4576
YCR076C	161.088	-1.57258	0.63952	-2.459
YLR128W	161.089	-1.10006	0.638614	-1.72258
YJR108W	161.105	-0.825763	0.642655	-1.28492
YDR204W	161.574	-3.10132	0.719087	-4.31285
YOL152W	161.74	-0.868363	0.632984	-1.37186
YDR378C	162.621	-0.285743	0.622623	-0.458934
YAL044C	163.659	-1.05776	0.757138	-1.39705
YLR118C	165.604	-0.361906	0.636835	-0.568288
YKL214C	165.783	-0.0999544	0.651927	-0.153321
YOL043C	165.909	-0.041772	0.640063	-0.0652623
YMR156C	166.238	-0.0581789	0.653252	-0.0890604
YOR020W-A	166.271	-1.13739	0.65612	-1.73351
YJL217W	166.389	-1.25687	0.64668	-1.94357
YJL173C	167.093	-1.29091	0.645894	-1.99863
YOL015W	167.207	-0.909215	0.667952	-1.3612
YLR065C	167.453	-0.137717	0.628486	-0.219125
YNL286W	167.786	-0.137276	0.628197	-0.218524
YBR033W	167.854	-2.14897	0.652007	-3.29594
YNL092W	168.126	-3.59944	0.725666	-4.96018
YNL320W	168.365	-0.322033	0.620433	-0.519046
YLR271W	168.777	-0.960922	0.655538	-1.46585
YAL007C	168.829	-0.288372	0.621949	-0.463658
YMR251W	168.972	-0.707836	0.711126	-0.995374
YIL028W	169.137	-3.74448	0.677325	-5.52833
YBR037C	169.143	-0.467627	0.639841	-0.73085
YPR107C	169.225	-0.38187	0.630332	-0.605823
YJL196C	169.922	-0.148417	0.676117	-0.219513
YIL007C	169.954	-0.633772	0.620787	-1.02092
YGR213C	170.313	-0.301528	0.659649	-0.457104
YBL059C-A	170.337	-0.84276	0.658253	-1.2803
YBR058C-A	170.894	0.003737	0.623097	0.00599745
YOR289W	170.956	-3.72207	0.7538	-4.93775
YDR531W	171.857	-1.3852	0.636296	-2.17697
YMR112C	171.92	-0.350361	0.620269	-0.564853
YML030W	172.078	-1.892	0.683703	-2.76729
YHR057C	172.312	-0.280322	0.624099	-0.449162
YGR113W	173.165	-0.27416	0.701949	-0.390569
YOL146W	173.214	-0.376539	0.636417	-0.591656
YMR209C	173.338	-0.298168	0.637811	-0.467487
YOL110W	173.469	-2.15464	0.650032	-3.31466
YML050W	173.644	-0.352275	0.648981	-0.542813
YKL208W	173.804	-0.137266	0.669938	-0.204893
YPL065W	173.824	-0.6662	0.668296	-0.996864
YFL052W	174.056	-6.0166	0.886466	-6.78717
YKL041W	174.84	-0.396677	0.66554	-0.596023
YJR161C	174.935	-1.41734	0.771125	-1.83801
YOL107W	175.36	-0.210086	0.67337	-0.311992
YBR201C-A	175.696	-1.39395	0.833757	-1.67189
YLR165C	176.084	-1.17961	0.620181	-1.90204
YDR279W	176.217	-0.378422	0.634502	-0.596409
YLR136C	176.676	-1.47565	0.697002	-2.11714
YMR194C-B	176.926	-0.989725	0.63477	-1.55919
YPR100W	177.29	-1.07423	0.660365	-1.62672
YGR181W	177.395	-0.112894	0.627345	-0.179955
YBL031W	177.527	-0.460686	0.654495	-0.70388
YIR029W	178.417	-0.235542	0.66591	-0.353714
YFR045W	178.6	-1.5109	0.627747	-2.40687
YBR285W	178.626	-5.22121	2.7687	-1.8858
YHR176W	178.824	-0.0370076	0.646072	-0.057281
YIL157C	178.993	-1.27847	0.633044	-2.01957
YOR174W	179.056	-0.0695025	0.63344	-0.109722
YIL072W	180.301	-2.78982	0.68114	-4.0958
YER188W	180.401	-0.239513	0.622912	-0.384506
YBR024W	180.608	-0.706333	0.642119	-1.1
YJR135C	180.634	-0.277774	0.618962	-0.448775
YAL064W-B	181.198	-0.851093	0.688609	-1.23596
YFL030W	181.429	-1.85222	0.670621	-2.76195
YOR126C	181.6	-0.778437	0.623919	-1.24766
YER153C	182.145	-0.484889	0.628421	-0.771599
YAL009W	182.301	-0.740277	0.647789	-1.14277
YAL027W	182.422	-0.0398224	0.621509	-0.0640738
YNR075W	182.577	-0.159861	0.62882	-0.254223
YHL021C	182.586	-2.89281	0.719705	-4.01943
YBR088C	182.63	-2.05068	0.64078	-3.20029
YCR083W	183.111	-1.69069	0.67214	-2.51538
YER121W	183.168	-4.6162	0.842107	-5.48173
YDL119C	183.527	-0.125141	0.666669	-0.187711
YFR008W	183.529	-1.08975	0.625006	-1.74358
YFR011C	183.538	-0.607354	0.62365	-0.973871
YNL214W	183.579	-0.720256	0.62694	-1.14884
YJR019C	183.827	-0.77097	0.629669	-1.2244
YLR251W	184.144	-2.31121	0.757802	-3.04989
YER182W	184.275	-1.00967	0.657369	-1.53592
YLR211C	184.837	-2.02869	0.664702	-3.05203
YJL205C	185.724	-1.34758	0.648885	-2.07676
YIL099W	186.065	-5.42795	0.8474	-6.40541
YHR192W	186.677	-0.630111	0.621035	-1.01461
YAL063C	187.031	-0.312732	0.6589	-0.474627
YPR134W	187.143	-0.537449	0.630298	-0.852691
YLR262C	187.314	-0.262895	0.625797	-0.420096
YJR030C	188.002	-0.753711	0.631952	-1.19267
YOR292C	188.782	-1.86567	0.674247	-2.76704
YMR264W	188.83	-0.462135	0.613791	-0.752919
YMR015C	189.686	-0.278104	0.628991	-0.442143
YHR199C-A	189.754	-0.779132	0.637361	-1.22243
YHR083W	190.015	-0.378925	0.618633	-0.612521
YER115C	190.455	-0.484597	0.614698	-0.78835
YAR008W	191.393	-0.485203	0.653712	-0.742227
YGR039W	191.759	-0.207861	0.616748	-0.337028
YBR148W	192.282	-2.51597	0.783451	-3.2114
YDR381C-A	192.334	-0.891612	0.618808	-1.44085
YDR202C	192.744	-1.74708	0.673772	-2.59298
YFR041C	192.891	-0.558519	0.619177	-0.902034
YNL146W	192.946	-0.449135	0.644465	-0.696911
YDR320C-A	193.234	-0.129614	0.61344	-0.21129
YMR289W	193.495	-1.46513	0.632586	-2.31609
YFR044C	193.778	-2.28825	0.621409	-3.68235
YMR117C	193.785	-0.0915832	0.633554	-0.144555
YOR228C	194.2	-2.13351	0.626236	-3.40689
YDL230W	194.444	-0.955358	0.636053	-1.50201
YLR078C	194.822	-0.426181	0.643711	-0.662069
YBR186W	195.178	-1.68127	0.626084	-2.68538
YPL103C	195.365	-0.382102	0.616406	-0.619887
YBR167C	195.901	-0.450109	0.631987	-0.712212
YEL052W	196.124	-0.813786	0.639484	-1.27257
YMR065W	196.241	-0.841877	0.618075	-1.3621
YLR313C	196.306	-1.76044	0.633942	-2.77697
YBL003C	196.608	-0.335519	0.63837	-0.525587
YDR503C	196.818	-0.0452578	0.624729	-0.0724438
YML078W	196.944	-0.575846	0.630419	-0.913434
YDR383C	197.396	-2.22779	0.752925	-2.95885
YOR053W	197.993	-0.277992	0.633003	-0.439164
YDL107W	199.476	-0.676843	0.615711	-1.09929
YLR393W	199.687	-0.345047	0.627856	-0.549564
YLR423C	199.749	-1.46546	0.625409	-2.34321
YML110C	199.759	-2.73046	0.638429	-4.27685
YNL254C	199.905	-0.899451	0.666045	-1.35043
YLR376C	199.97	-0.70737	0.785863	-0.900118
YLR283W	200.112	-1.22335	0.626664	-1.95216
YLR043C	201.088	-2.30534	0.656673	-3.51063
YMR159C	201.117	-3.38858	0.693882	-4.88351
YJL145W	201.486	-0.20087	0.63537	-0.316147
YGL006W-A	201.807	-5.39924	0.899731	-6.00095
YJR100C	201.936	-1.66407	0.612902	-2.71507
YPL107W	202.332	-0.373865	0.628214	-0.595124
YFR046C	202.486	-0.86665	0.628512	-1.37889
YDR196C	202.655	-2.95962	0.67279	-4.39903
YNL304W	202.826	-0.589183	0.623132	-0.945519
YFL044C	202.857	-2.29023	0.810837	-2.82452
YCR101C	203.025	-4.08121	0.664467	-6.14208
YER044C	203.1	-1.12013	0.728654	-1.53726
YFR003C	203.172	-3.16801	0.71742	-4.41583
YHR110W	203.373	-2.0527	0.663503	-3.09373
YDL237W	203.4	-1.56789	0.654892	-2.39413
YHR015W	203.596	0.0380139	0.778905	0.0488043
YNL253W	203.856	-0.636379	0.662964	-0.9599
YOR150W	204.29	-0.115693	0.628462	-0.184088
YOL102C	205.768	0.0188203	0.624128	0.0301546
YPR051W	206.025	-0.294369	0.626994	-0.469492
YJL105W	206.293	-0.736214	0.716782	-1.02711
YER028C	208.295	-0.654081	0.628357	-1.04094
YBL080C	208.597	-0.678511	0.637803	-1.06383
YCR028C-A	208.78	-0.899244	0.625499	-1.43764
YJL055W	208.837	-0.532921	0.654684	-0.814013
YER152C	209.8	-0.530996	0.628841	-0.844404
YGL104C	209.944	-2.4006	0.652315	-3.68012
YGR232W	209.965	-1.30923	0.629462	-2.07993
YLR036C	210.355	-0.83926	0.626265	-1.3401
YJL063C	210.44	-0.144012	0.618427	-0.232868
YJR120W	210.493	-3.29348	0.747599	-4.4054
YGL185C	210.708	-0.886895	0.622818	-1.424
YLR231C	210.869	-0.77394	0.673957	-1.14835
YOL073C	211.002	-1.0543	0.628647	-1.67709
YOR143C	211.264	-0.0953709	0.636491	-0.149839
YGR144W	211.273	-2.73693	0.739011	-3.7035
YBL040C	211.36	-0.78613	0.612895	-1.28265
YKL137W	211.44	-0.168525	0.655533	-0.257082
YJR107W	212.59	-0.71173	0.621939	-1.14437
YGR247W	212.778	-1.97166	0.631973	-3.11985
YNR041C	213.775	-0.0295268	0.642143	-0.0459816
YML085C	213.841	-0.657862	0.616568	-1.06697
YJR133W	213.925	-0.302538	0.62394	-0.484883
YNL058C	214.115	-2.13352	0.702805	-3.03573
YER149C	214.286	-0.628331	0.620106	-1.01326
YDL090C	214.473	-1.44678	0.617173	-2.34421
YOL095C	214.825	-0.468504	0.629469	-0.744284
YBR128C	215.249	-2.6578	0.635558	-4.18185
YBR053C	215.294	-3.7141	0.678319	-5.47544
YJL062W-A	215.601	-0.229891	0.64105	-0.358617
YKL091C	215.693	-2.41204	0.718164	-3.35863
YKL178C	216.268	-0.197644	0.727213	-0.271782
YER029C	216.364	-0.47047	0.628348	-0.74874
YJR086W	217.284	-0.822738	0.662322	-1.2422
YMR041C	217.79	-1.52237	0.639139	-2.38191
YDR308C	218.402	-0.402919	0.656853	-0.613408
YDL043C	218.54	-0.0384468	0.683129	-0.0562804
YDR480W	219.094	-0.432927	0.615883	-0.702938
YNL316C	219.29	-0.262951	0.627967	-0.418734
YOR367W	219.447	-0.134848	0.6079	-0.221826
YDR435C	219.606	-4.15424	0.73376	-5.66158
YGR248W	220.597	-5.00567	0.962384	-5.20133
YOL012C	220.905	-0.260556	0.607139	-0.429154
YKR098C	221.052	-0.955651	0.622348	-1.53556
YFL046W	221.468	-0.263178	0.608719	-0.432347
YMR293C	221.485	-0.516334	0.60799	-0.849247
YAL047C	221.84	-1.0204	0.643039	-1.58683
YMR058W	221.951	-0.355546	0.67204	-0.529054
YMR157C	222.282	-0.330103	0.615771	-0.536081
YMR111C	222.516	-0.297407	0.608535	-0.488727
YDR376W	222.81	-0.789512	0.65365	-1.20785
YML095C	223.134	-0.199144	0.613407	-0.324652
YLR103C	223.402	-1.70291	0.622273	-2.7366
YDL101C	223.413	-0.353775	0.641153	-0.551779
YNL070W	223.505	-0.0287472	0.609274	-0.0471828
YKL159C	223.872	-0.290179	0.612809	-0.473523
YOL056W	223.908	-0.0466951	0.613888	-0.0760645
YJL059W	223.919	-1.51829	0.686975	-2.21011
YIL100C-A	224.04	-4.81286	0.932824	-5.15945
YOR015W	224.463	-0.158035	0.668943	-0.236245
YMR040W	225.092	-1.05083	0.650281	-1.61597
YGL004C	226.179	-0.0846721	0.636509	-0.133026
YKL138C	226.241	-0.01116	0.631222	-0.01768
YGL257C	226.463	-0.405804	0.615147	-0.659686
YPL152W	227.169	-1.81499	0.65281	-2.78027
YCR073W-A	227.255	-1.86353	0.693528	-2.68703
YKR087C	227.749	-0.162819	0.60813	-0.267737
YDR374C	228.144	-2.72967	0.679645	-4.01631
YHR109W	228.216	-0.258911	0.606481	-0.426908
YGL079W	228.242	-0.0235833	0.627921	-0.0375577
YNL331C	228.875	-0.657982	0.624071	-1.05434
YBR107C	229.003	-0.75821	0.642098	-1.18083
YHR016C	229.147	-3.14647	0.702764	-4.47728
YMR094W	229.75	-1.02943	0.605617	-1.6998
YJL023C	230.205	-0.599851	0.626738	-0.957101
YPR037C	230.446	-0.00763133	0.62695	-0.0121722
YOR223W	230.551	-1.48189	0.641696	-2.30934
YKR055W	230.715	-0.977015	0.667349	-1.46402
YNL081C	230.753	-0.557197	0.630884	-0.8832
YJR058C	230.992	-0.121512	0.636789	-0.19082
YDL169C	231.181	-5.18512	0.720385	-7.1977
YOL003C	231.494	-0.925244	0.60895	-1.51941
YOR148C	232.446	-0.439128	0.611188	-0.718482
YGR205W	232.933	-4.70574	0.727887	-6.46494
YLL006W	233.457	-1.1745	0.614497	-1.91132
YJL161W	233.843	-2.71888	0.734347	-3.70244
YOR079C	233.868	-0.143794	0.742134	-0.193757
YMR048W	234.539	0.00362134	0.610145	0.00593521
YLR102C	234.997	-0.78482	0.609454	-1.28774
YNL246W	235.008	-0.40526	0.657448	-0.616414
YKR065C	235.07	-1.18182	0.609663	-1.93848
YDR163W	235.325	-0.0575826	0.604718	-0.0952223
YDR322C-A	235.462	-1.71146	0.617257	-2.77269
YPR098C	235.62	-2.96197	0.690644	-4.2887
YBR138C	235.81	-2.14092	0.628358	-3.40717
YKL061W	235.872	-0.164475	0.62531	-0.26303
YPL007C	236.035	-1.31752	0.646784	-2.03704
YHR011W	236.042	-0.043164	0.637684	-0.0676887
YML021C	236.192	-0.0992138	0.60832	-0.163095
YOR383C	236.22	-1.15418	0.691729	-1.66854
YLR100W	236.595	-0.315683	0.645679	-0.488916
YNR022C	236.597	-0.144445	0.629563	-0.229438
YPL096W	236.671	-1.20911	0.609083	-1.98514
YOR266W	236.679	-0.667014	0.637937	-1.04558
YFR020W	236.976	-0.39817	0.618796	-0.643459
YPL059W	237.27	-0.72643	0.609164	-1.1925
YER084W	237.374	-2.32036	0.708937	-3.27301
YKL220C	237.664	-0.421168	0.698895	-0.60262
YNL045W	237.727	-2.9399	0.693897	-4.23679
YOL053W	239.104	-2.12491	0.651709	-3.26051
YBR204C	239.149	-1.33335	0.627917	-2.12346
YIL139C	239.83	-0.185914	0.607964	-0.305798
YLR446W	239.865	-1.70856	0.635667	-2.68782
YNL315C	240.306	-0.587938	0.629554	-0.933897
YHR017W	240.584	-0.909008	0.632553	-1.43705
YNL026W	242.097	-1.74582	0.715216	-2.44097
YHR160C	242.355	-2.9066	0.71219	-4.08121
YGR016W	242.798	-0.959105	0.627224	-1.52913
YBR255C-A	242.851	-1.99825	0.619871	-3.22366
YGR136W	243.007	-0.377199	0.63964	-0.589705
YHR034C	243.595	-0.139126	0.602189	-0.231035
YER042W	244.169	-2.36697	0.661426	-3.57858
YLR146C	245.196	-0.0979129	0.668082	-0.146558
YNL312W	245.432	-0.1044	0.604254	-0.172775
YJL147C	246.065	-0.258681	0.611272	-0.423185
YOL071W	246.476	-1.81513	0.651323	-2.78683
YDL146W	246.748	-1.22662	0.622768	-1.96963
YNR028W	247.605	-0.711186	0.604216	-1.17704
YLL057C	247.791	-1.9605	0.750172	-2.6134
YHL031C	248.812	-0.615757	0.606054	-1.01601
YOR103C	249.589	-1.44552	0.612877	-2.35859
YPL258C	250.176	-0.815442	0.61907	-1.3172
YLR204W	250.211	-0.235209	0.601513	-0.39103
YDR518W	250.727	-0.0239027	0.68298	-0.0349976
YER179W	250.755	-5.19909	0.875073	-5.94132
YGR262C	251.217	-0.159164	0.670985	-0.23721
YGR168C	251.267	-1.02852	0.610964	-1.68343
YDR282C	251.276	-0.678288	0.617738	-1.09802
YJL180C	252.082	-0.85234	0.606856	-1.40452
YOR025W	252.565	-0.457738	0.601182	-0.761397
YPL076W	252.843	-0.121465	0.613728	-0.197914
YBR003W	253.601	-0.989081	0.620985	-1.59276
YDR462W	254.1	0.00889052	0.614884	0.0144589
YHL008C	254.329	-1.25657	0.658904	-1.90706
YKL151C	254.536	-6.0423	0.849152	-7.11569
YDR535C	254.77	-2.16709	0.720374	-3.00828
YKR027W	254.928	-0.125203	0.656947	-0.190583
YLL062C	255.653	-1.94606	0.624533	-3.11603
YKR068C	255.706	-0.270013	0.623937	-0.432756
YDL004W	256.597	-2.51325	0.645943	-3.89083
YCR100C	256.605	-3.52812	0.676405	-5.21599
YOR114W	256.899	-1.40891	0.797145	-1.76745
YGR201C	257.43	-2.4504	0.663236	-3.69462
YNL035C	257.97	-0.392574	0.760971	-0.515886
YKL045W	258.61	-0.263004	0.599296	-0.438855
YKL206C	259.013	-0.398441	0.599248	-0.664901
YDL135C	259.022	-0.373202	0.606701	-0.615133
YGL005C	259.593	-0.315496	0.67685	-0.466124
YOR097C	259.989	-1.4986	0.681214	-2.1999
YNL200C	260.195	-5.1683	0.783066	-6.60009
YDL144C	260.58	-0.638142	0.600883	-1.06201
YHR116W	260.701	-1.28049	0.658502	-1.94455
YBR120C	260.823	0.0232249	0.606128	0.0383168
YLR290C	261.084	-1.64349	0.615738	-2.66914
YHR156C	261.121	-0.354491	0.601529	-0.589316
YDR319C	262.034	-0.699196	0.659623	-1.05999
YBR205W	262.911	-0.0673389	0.611921	-0.110045
YKR074W	263.02	-0.505088	0.639652	-0.789629
YLR353W	263.023	-1.71205	0.61411	-2.78786
YKL103C	263.444	-3.07338	0.669928	-4.58763
YKL221W	264.668	-2.34695	0.676731	-3.46806
YCL035C	265.336	-1.99492	0.639473	-3.11963
YGL254W	265.573	-0.100696	0.632539	-0.159194
YNR064C	265.819	-1.79606	0.636109	-2.82351
YNL310C	266.318	-0.0862689	0.602401	-0.143208
YKL170W	267.081	-0.93731	0.60932	-1.53829
YOL065C	267.281	-1.89997	0.651599	-2.91586
YLR080W	267.318	-2.10027	0.628532	-3.34154
YDR323C	267.508	-0.0528672	0.614062	-0.0860943
YDR032C	267.852	-4.60231	0.698023	-6.59336
YPL168W	269.377	-0.162457	0.600894	-0.270359
YHR104W	269.972	-1.33048	0.662617	-2.00791
YDR437W	271.047	-0.0377761	0.636891	-0.0593132
YPR180W	271.886	-0.0700401	0.607056	-0.115377
YPR176C	272.161	0.0044099	0.640039	0.00689004
YJL066C	272.774	-2.44443	0.664093	-3.68085
YDR287W	272.891	-1.85135	0.626914	-2.95312
YPL271W	272.997	-0.931651	0.598975	-1.55541
YKL017C	273.006	-1.44783	0.649441	-2.22935
YKR003W	273.055	-3.49599	0.688788	-5.07557
YDR373W	273.134	-0.426295	0.603229	-0.706688
YNR058W	273.42	0.0128398	0.686279	0.0187092
YER104W	273.673	-0.516508	0.629333	-0.820724
YPL208W	273.676	-0.225799	0.612037	-0.368931
YGR171C	274.591	-0.623081	0.610928	-1.01989
YHR105W	274.96	-1.9937	0.664903	-2.99848
YIL003W	275.616	-0.0101478	0.602016	-0.0168564
YBR111C	275.878	-1.23544	0.651043	-1.89763
YIL140W	275.938	-1.13592	0.625196	-1.81691
YPL071C	276.136	-0.597014	0.611522	-0.976275
YGR021W	276.138	-0.221087	0.678654	-0.325772
YGR042W	276.549	-0.796521	0.621146	-1.28234
YIL154C	277.213	-0.845071	0.620728	-1.36142
YIR024C	277.475	-0.198681	0.606426	-0.327625
YOR286W	277.686	-0.120337	0.598438	-0.201085
YDR440W	278.123	-0.451434	0.619156	-0.729112
YIR042C	278.172	-0.0569532	0.597608	-0.0953019
YIL063C	279.25	-0.131562	0.609506	-0.21585
YDR534C	279.51	-2.37665	0.676908	-3.51104
YOR176W	280.665	-2.40838	0.738413	-3.26156
YCR007C	281.109	-0.158916	0.62859	-0.252814
YBL102W	281.429	-1.07047	0.605449	-1.76806
YOR358W	282.014	-0.355484	0.597815	-0.594638
YER087W	282.194	-0.319508	0.611176	-0.522775
YDL045C	282.36	-0.0331219	0.606801	-0.0545844
YDR519W	282.78	-0.325386	0.618496	-0.526093
YBR201W	283.02	-0.908386	0.610153	-1.48878
YIR007W	283.044	-1.74845	0.616984	-2.83387
YLR038C	283.105	-1.9039	0.687573	-2.76902
YDR231C	283.136	-2.34995	0.73917	-3.17917
YIL062C	284.175	-1.0868	0.680167	-1.59784
YDR315C	284.696	-1.23125	0.60535	-2.03394
YKL140W	285.394	-1.44176	0.626841	-2.30004
YLR323C	285.496	-0.398241	0.601046	-0.662579
YHR132W-A	285.645	-1.1806	0.627353	-1.88188
YGR112W	285.681	-1.42721	0.630298	-2.26434
YDR126W	285.767	-0.126538	0.605051	-0.209137
YHR106W	286.852	-2.26215	0.664298	-3.40533
YOR238W	287.178	-1.42805	0.642757	-2.22176
YML037C	287.553	-0.513378	0.607066	-0.845671
YPL003W	287.601	-5.82106	0.767179	-7.58763
YNL015W	287.989	-4.7292	0.834334	-5.66824
YLL063C	288.389	-0.676252	0.632979	-1.06836
YDL017W	288.875	-0.611071	0.596351	-1.02468
YLR091W	288.908	-0.704153	0.598315	-1.17689
YHR075C	289.242	-1.80934	0.641134	-2.82209
YOL143C	289.336	-0.335885	0.620876	-0.540986
YGR015C	290.139	-0.270735	0.603502	-0.448606
YHL014C	290.282	-0.268973	0.606898	-0.443193
YOR022C	290.324	-1.38922	0.617602	-2.24937
YEL070W	291.173	-2.02519	0.831045	-2.43692
YEL005C	291.224	-1.30101	0.666779	-1.95119
YLR216C	292.04	-1.16952	0.597973	-1.95581
YJR047C	292.183	-0.00852322	0.850955	-0.0100161
YER180C-A	292.962	-0.188775	0.60626	-0.311376
YDR414C	293.107	-0.0245629	0.599176	-0.0409944
YBR234C	293.689	-2.44088	0.638908	-3.8204
YNR036C	293.994	-1.04855	0.61483	-1.70543
YMR256C	294.281	-2.15002	0.637913	-3.37039
YFL054C	295.048	-2.70547	0.652247	-4.14793
YOR250C	295.624	-0.502618	0.596011	-0.843302
YMR113W	295.672	-0.529066	0.599187	-0.882973
YPL148C	295.757	-0.258748	0.668086	-0.387297
YDR019C	295.888	-0.227107	0.709788	-0.319964
YIL073C	295.979	-2.33452	0.606416	-3.84971
YOR057W	296.237	-0.719453	0.599343	-1.2004
YDR377W	298.241	-2.10788	0.648211	-3.25184
YIL152W	298.414	-0.185721	0.607677	-0.305625
YNL215W	298.477	-0.419924	0.611887	-0.686278
YPL247C	299.339	-2.35123	0.640282	-3.67218
YER119C	299.453	-1.9878	0.638552	-3.11298
YGL002W	299.969	-0.657136	0.59497	-1.10449
YGL153W	300.04	-0.740012	0.642138	-1.15242
YPL002C	301.044	-0.558029	0.609814	-0.915082
YBR076W	301.299	-0.686548	0.599036	-1.14609
YER016W	301.353	-0.149012	0.613147	-0.243028
YKL193C	301.431	-3.52196	0.748572	-4.7049
YMR026C	302.382	-1.1813	0.629487	-1.87661
YGL124C	302.394	-1.81192	0.596147	-3.03938
YPL200W	302.902	-4.08007	0.814936	-5.00662
YKL130C	302.932	-0.579972	0.612628	-0.946695
YPL191C	303.32	-0.202163	0.605915	-0.33365
YGR194C	304.824	-1.91909	0.737458	-2.6023
YDR371W	305.383	-1.41289	0.595177	-2.3739
YBR240C	306.039	-0.198322	0.620332	-0.319703
YKL098W	307.318	-0.27885	0.620805	-0.449174
YLR395C	307.385	-1.81071	0.632955	-2.86073
YLR092W	307.445	-0.670793	0.626779	-1.07022
YKR077W	307.456	-0.759393	0.603098	-1.25915
YMR097C	308.145	-0.714703	0.620363	-1.15207
YOR185C	308.739	-4.61503	0.728604	-6.33407
YGL065C	308.797	-0.546917	0.593881	-0.92092
YNR061C	308.872	-0.231464	0.59986	-0.385864
YBL001C	309.43	-1.69019	0.67824	-2.49203
YGR111W	310.308	-1.10633	0.59696	-1.85328
YBL098W	310.371	-1.64068	0.70429	-2.32956
YJR085C	310.396	-1.92472	0.624304	-3.08298
YLR097C	311.284	-1.15001	0.608091	-1.89118
YPL134C	313.106	-1.25648	0.622401	-2.01876
YMR267W	314.139	-0.63214	0.606963	-1.04148
YNL093W	314.258	-4.27425	0.721195	-5.92663
YMR154C	314.339	-1.44375	0.608592	-2.37229
YKR080W	314.755	-0.4892	0.609269	-0.80293
YLL056C	315.321	-1.01764	0.663732	-1.53321
YLR105C	315.407	-0.373486	0.64103	-0.582634
YLR288C	316.945	-0.396219	0.608492	-0.651149
YDR513W	317.084	-2.41151	0.757575	-3.18319
YMR106C	317.709	-2.31113	0.630521	-3.66543
YOL158C	317.89	-0.996857	0.738229	-1.35034
YPR155C	317.969	-1.65707	0.67843	-2.44251
YHR087W	318.146	-5.14966	0.877517	-5.86844
YIR015W	318.642	-1.01079	0.683304	-1.47926
YGR222W	319.731	-0.311261	0.657694	-0.473261
YOL164W	319.935	-0.0770763	0.622927	-0.123733
YKL160W	320.557	-0.300457	0.601481	-0.49953
YLR178C	321.364	-3.60888	0.883412	-4.08517
YIL034C	321.442	-1.71897	0.668241	-2.57238
YBR272C	321.519	-0.824024	0.593836	-1.38763
YDR411C	321.613	-0.50936	0.602187	-0.845851
YLR245C	322.123	-0.21038	0.62049	-0.339055
YBR217W	322.293	-0.506804	0.622711	-0.813867
YCR051W	322.415	-0.594644	0.601128	-0.989214
YOL042W	323.123	-0.359587	0.593278	-0.606103
YGL136C	323.282	-0.296163	0.598427	-0.494902
YHR198C	323.377	-0.90892	0.639031	-1.42234
YLR004C	323.925	-0.486924	0.706113	-0.689583
YDR236C	324.575	-0.350783	0.597871	-0.58672
YDL181W	324.741	-2.8291	0.644032	-4.3928
YBR293W	325.206	-0.00372386	0.610693	-0.00609777
YDL216C	325.565	-1.43314	0.631235	-2.27038
YMR232W	326.013	-1.57631	0.701436	-2.24726
YPR127W	326.028	-2.15333	0.738271	-2.91672
YCR079W	326.646	-0.977358	0.618842	-1.57933
YHR101C	326.655	-0.29369	0.644848	-0.45544
YDR486C	326.791	-0.234142	0.611448	-0.382931
YCL029C	327.266	-0.175618	0.619866	-0.283315
YCR088W	327.3	-1.51537	0.633888	-2.39059
YBL113C	327.611	-1.12432	0.617289	-1.82138
YDR175C	327.783	-0.577025	0.606251	-0.951791
YHL028W	329.36	-0.0796033	0.75909	-0.104867
YPL255W	329.925	-0.369537	0.607078	-0.608715
YJR043C	329.97	-0.114603	0.596277	-0.192198
YHR175W	330.524	-0.59684	0.608614	-0.980654
YPL127C	330.598	-2.00797	0.628223	-3.19627
YIL006W	331.062	-0.816412	0.593575	-1.37541
YIL116W	332.233	-0.393729	0.63461	-0.620427
YIR037W	334.252	-3.53421	0.635888	-5.5579
YGR010W	334.398	-0.126956	0.598594	-0.21209
YGR288W	334.433	-0.770665	0.662176	-1.16384
YER030W	334.467	-2.23833	0.684397	-3.27052
YJL053W	335.193	-0.419275	0.595076	-0.704573
YDR056C	335.239	-0.136066	0.624047	-0.218038
YMR163C	335.459	-1.09258	0.598127	-1.82666
YDR214W	335.56	-1.34381	0.614789	-2.18581
YPL264C	336.024	-0.928155	0.627836	-1.47834
YPR118W	336.473	-0.395916	0.633061	-0.625398
YCL028W	338.763	-0.768321	0.601398	-1.27756
YDR530C	339.712	-0.657371	0.600895	-1.09399
YJR056C	339.799	-0.17532	0.613995	-0.28554
YPR010C-A	340.371	-2.97135	0.638433	-4.65413
YEL001C	340.699	0.0153626	0.593606	0.02588
YGL237C	341.274	-1.64795	0.658252	-2.50352
YER079W	341.48	-2.02983	0.693567	-2.92665
YNL079C	341.7	-0.241159	0.645753	-0.373454
YMR155W	343.058	-0.929661	0.606724	-1.53226
YDR003W	343.068	-1.83547	0.652841	-2.81151
YPR172W	343.582	-2.9477	0.667598	-4.41538
YBR294W	343.589	-0.832642	0.75166	-1.10774
YDR254W	343.605	-0.430196	0.592249	-0.726378
YPL166W	343.859	-4.18755	0.709925	-5.89858
YOL049W	344.677	-1.16564	0.602848	-1.93356
YNL265C	344.824	-0.588972	0.604908	-0.973655
YER142C	344.879	-3.55897	0.69518	-5.11949
YFR031C	345.05	-0.457596	0.626823	-0.730024
YCL008C	345.49	-0.397086	0.593244	-0.669347
YER019C-A	345.924	-0.145445	0.621225	-0.234126
YEL023C	346.227	-0.406722	0.591907	-0.687139
YLL007C	346.317	-1.55857	0.62027	-2.51274
YNL003C	346.413	-1.74911	0.637728	-2.74272
YIL138C	346.845	-0.0766301	0.688057	-0.111372
YHR012W	347.101	-0.593181	0.632119	-0.938402
YDR265W	347.558	-0.485356	0.591519	-0.820525
YNL100W	347.799	-1.65855	0.700049	-2.36919
YJL060W	347.866	-2.359	0.728993	-3.23597
YDL103C	348.064	-1.15047	0.62237	-1.84853
YJR080C	348.303	-0.840709	0.595437	-1.41192
YJR073C	348.357	-1.03185	0.701086	-1.47179
YNR032W	348.512	-0.416073	0.605495	-0.687162
YJL185C	349.385	-3.74564	0.723205	-5.17923
YML129C	349.725	-0.384463	0.619593	-0.620509
YER050C	350.184	0.0159563	0.597099	0.026723
YGL200C	350.485	-0.12767	0.597497	-0.213675
YBR227C	350.573	-0.19359	0.592748	-0.326598
YPL156C	350.609	-1.89929	0.691952	-2.74483
YGR122W	351.308	-1.17069	0.755452	-1.54966
YGL075C	351.486	-0.902343	0.628432	-1.43586
YHL050C	351.604	-0.66881	0.622399	-1.07457
YJR001W	351.655	-1.3677	0.691265	-1.97855
YOL129W	351.728	-2.11994	0.608486	-3.48395
YPR145C-A	351.808	-0.40717	0.850278	-0.478867
YDR014W	352.286	-0.0868082	0.631275	-0.137512
YAL060W	352.877	-0.512284	0.590728	-0.867208
YAL049C	352.895	-1.77836	0.657636	-2.70417
YIR025W	353.416	-0.232268	0.590083	-0.393619
YHR035W	353.523	-0.0634764	0.615328	-0.103158
YJR021C	353.525	-0.554792	0.589117	-0.941736
YOR120W	353.935	-0.938115	0.609387	-1.53944
YIL042C	354.033	-1.73762	0.639251	-2.71821
YCL032W	354.197	-0.415381	0.59415	-0.699117
YDR273W	354.564	-0.0535633	0.602501	-0.0889016
YHL038C	354.632	-1.07932	0.730302	-1.47791
YNL249C	354.686	-0.0844422	0.599283	-0.140905
YML001W	354.71	-0.191249	0.605456	-0.315875
YOL117W	355.345	-1.18131	0.622344	-1.89816
YLR457C	355.933	-0.106593	0.600395	-0.177538
YGR289C	356.014	-3.25972	0.671015	-4.8579
YDR107C	356.048	-1.54012	0.61075	-2.52169
YGR037C	356.253	-0.661271	0.810719	-0.81566
YJR149W	356.437	-0.591098	0.638964	-0.925088
YPR116W	356.6	-0.782654	0.588818	-1.32919
YKR052C	356.605	-0.10671	0.667013	-0.159981
YJL099W	357.101	-1.28643	0.620381	-2.07361
YMR170C	357.304	-1.04767	0.645922	-1.62197
YDL184C	359.261	-0.114448	0.643939	-0.177731
YIL050W	359.798	-0.759577	0.650713	-1.1673
YJL210W	360.737	-0.389855	0.6208	-0.627988
YML005W	361.113	-0.0250978	0.635666	-0.0394827
YLR082C	361.541	-0.0624603	0.653888	-0.0955213
YDR173C	362.784	-0.60766	0.602251	-1.00898
YGR101W	362.842	-0.477848	0.597701	-0.799477
YMR179W	363.282	-1.77733	0.637186	-2.78934
YOR075W	363.48	-0.2459	0.606997	-0.40511
YJL178C	363.508	-0.0653264	0.594652	-0.109857
YMR063W	363.81	-0.307884	0.597289	-0.515469
YGL187C	364.004	-3.03091	0.668696	-4.53256
YPR193C	364.64	-2.11778	0.773844	-2.73671
YOR249C	364.712	-0.610823	0.599796	-1.01838
YDL067C	364.918	-0.316322	0.597738	-0.529199
YLR234W	365.517	-1.26285	0.619471	-2.0386
YOL088C	365.719	-1.12612	0.620002	-1.81631
YGR257C	365.815	-0.154627	0.588508	-0.262743
YNL012W	365.879	-1.99744	0.706067	-2.82897
YNL135C	366.738	-1.03716	0.614294	-1.68838
YDL200C	367.609	-1.12434	0.597431	-1.88195
YOR321W	367.815	-1.92903	0.624525	-3.0888
YBR020W	367.934	-1.42236	0.625386	-2.27437
YOR104W	368.245	-0.356028	0.602631	-0.590789
YJR096W	369.528	-3.13143	0.747763	-4.18773
YJL131C	369.707	-0.142107	0.600199	-0.236767
YML081C-A	369.974	-0.686278	0.618909	-1.10885
YOR152C	371.434	-2.02396	0.656163	-3.08453
YLR193C	371.446	-0.902317	0.627244	-1.43854
YGR170W	371.728	-0.983954	0.641182	-1.53459
YBR171W	372.3	-0.0143175	0.592147	-0.0241789
YMR130W	373.671	-0.108645	0.591204	-0.18377
YAR020C	373.912	-1.93627	0.650938	-2.97458
YLR394W	374.159	-0.202302	0.596114	-0.339368
YML008C	374.666	-0.85193	0.653893	-1.30286
YDL002C	375	-0.0256411	0.591854	-0.0433234
YMR120C	375.431	-1.36619	0.635375	-2.15021
YKR106W	376.008	-0.372144	0.704287	-0.528398
YOL038W	377.607	-0.836505	0.657847	-1.27158
YMR152W	377.911	-1.83487	0.601039	-3.05283
YGL251C	378.348	-4.84603	0.730374	-6.635
YPL194W	379.044	-0.91731	0.634032	-1.44679
YGL193C	379.533	-0.190642	0.598835	-0.318355
YCL034W	379.849	-1.38787	0.624959	-2.22073
YDL175C	380.061	-0.0167251	0.58908	-0.0283919
YML051W	380.47	-0.720813	0.589302	-1.22316
YJL049W	380.692	-0.139162	0.619418	-0.224666
YOL072W	381.058	-0.141795	0.620311	-0.228587
YPL119C-A	381.089	-2.97194	0.6793	-4.375
YIL120W	381.302	-0.243383	0.602918	-0.403676
YHR112C	381.653	-1.23473	0.631598	-1.95493
YNL025C	381.677	-0.681788	0.609246	-1.11907
YER063W	381.936	-1.96212	0.66646	-2.94408
YNL097C	381.994	-0.104545	0.599023	-0.174526
YOR040W	382.306	-1.85114	0.67239	-2.75308
YHL019C	382.486	-0.926854	0.586615	-1.58
YMR084W	383.463	-0.884143	0.736833	-1.19992
YJR004C	383.743	-1.23268	0.59803	-2.06124
YGL082W	384.023	-1.3694	0.63002	-2.17358
YMR314W	384.079	-0.834303	0.646785	-1.28992
YCR107W	384.813	-0.364332	0.591359	-0.616094
YOR180C	385.388	-2.47304	0.63132	-3.91725
YPL120W	386.282	-0.77605	0.587283	-1.32143
YMR208W	387.128	-0.409714	0.594418	-0.689268
YNL149C	387.339	-0.283711	0.602241	-0.471093
YGR225W	387.765	-1.51199	0.651479	-2.32086
YAL048C	388.607	-0.921856	0.591715	-1.55794
YLR098C	389.723	-0.146947	0.643548	-0.228338
YGL210W	390.021	0.0248167	0.588462	0.0421721
YGR110W	390.845	-2.78994	0.684649	-4.07499
YBR185C	391.094	-0.322895	0.603622	-0.534929
YDR332W	391.641	-0.211683	0.586549	-0.360896
YLR131C	393.642	-0.135016	0.613841	-0.219952
YLR164W	393.961	-3.41774	0.667787	-5.11801
YKL162C	395.282	-2.55472	0.674782	-3.786
YKL001C	395.323	-0.752473	0.596864	-1.26071
YLR181C	395.848	-0.81992	0.604611	-1.35611
YNL237W	396.396	-2.7094	0.64543	-4.19782
YMR078C	396.454	-0.0368929	0.602717	-0.0612109
YIL013C	396.8	-1.14805	0.6509	-1.76379
YKR078W	397.097	-0.692244	0.590437	-1.17243
YIL162W	397.633	-0.497231	0.927384	-0.536165
YDR178W	397.961	-3.47342	0.651152	-5.33426
YPL225W	398.216	-0.403476	0.627021	-0.643481
YHR159W	398.45	-1.17914	0.676322	-1.74346
YDR363W-A	398.747	-1.06066	0.716953	-1.4794
YGR026W	398.883	-2.27795	0.608508	-3.7435
YDL076C	399.656	-1.43792	0.612952	-2.3459
YGL181W	399.93	-0.628055	0.5923	-1.06037
YPL173W	400.432	-0.102589	0.608426	-0.168614
YPL111W	401.218	-0.571554	0.65688	-0.870103
YCL049C	401.386	-1.17468	0.712928	-1.64768
YAL010C	401.478	-1.56058	0.654751	-2.38347
YLR361C	401.662	-0.507353	0.612349	-0.828535
YPL250C	401.679	-0.947628	0.601691	-1.57494
YNR045W	401.743	-0.770224	0.602274	-1.27886
YDR192C	402.801	-0.0802103	0.593092	-0.135241
YDL089W	403.437	-0.911506	0.598352	-1.52336
YDR009W	403.821	-3.10287	0.644518	-4.81426
YPL005W	404.368	-0.494005	0.586793	-0.841873
YER078C	404.706	-0.67029	0.686782	-0.975987
YEL041W	404.856	-3.59938	0.676402	-5.32136
YIR014W	405.026	-2.25175	0.672173	-3.34996
YJR044C	405.242	-3.2444	0.664593	-4.88178
YCL012C	406.271	-2.79956	0.622105	-4.50013
YDR484W	406.654	-0.46171	0.614505	-0.751353
YAL067C	406.707	-2.13626	0.68118	-3.13611
YJL046W	407.254	-0.0562811	0.594481	-0.0946727
YDR532C	408.288	-0.446098	0.605667	-0.736539
YGL113W	408.365	-0.840055	0.612637	-1.37121
YER139C	408.886	-0.246312	0.605955	-0.406485
YMR098C	409.175	-0.316882	0.603969	-0.524666
YLR151C	410.092	-3.36294	0.713739	-4.71173
YLR233C	410.434	-0.632982	0.630169	-1.00446
YOR381W	411.218	-0.270794	0.612725	-0.44195
YOR327C	412.415	-0.240367	0.592292	-0.405825
YAR050W	413.057	-0.384058	0.667316	-0.575527
YLR392C	413.671	-1.67484	0.620557	-2.69893
YBR183W	414.458	-2.61895	0.593995	-4.40904
YMR085W	415.45	-0.867624	0.756289	-1.14721
YFR021W	415.503	-1.09192	0.639198	-1.70826
YBR130C	415.945	-0.212055	0.64917	-0.326655
YNL202W	416.878	-4.01474	0.679292	-5.91019
YDR536W	417.069	-2.61759	0.709609	-3.68878
YHR001W	417.259	-1.48403	0.615496	-2.41112
YJL079C	417.39	-0.151301	0.652258	-0.231964
YER150W	417.513	-0.875458	0.60072	-1.45735
YFR024C-A	417.595	-2.00429	0.692913	-2.89255
YOL116W	417.964	-0.29476	0.598699	-0.492333
YPR178W	419.353	-0.0154321	0.589104	-0.0261959
YPR013C	419.361	-0.700656	0.603982	-1.16006
YCR023C	419.504	0.00524242	0.588784	0.00890381
YLR370C	419.765	-1.29904	0.618164	-2.10146
YBR269C	420.288	-0.936153	0.592399	-1.58027
YNR035C	420.303	-1.20097	0.652614	-1.84025
YPL253C	420.694	-1.09974	0.630437	-1.74442
YPL097W	420.738	-0.232663	0.624562	-0.372521
YNL213C	422.251	-0.0524211	0.585406	-0.0895466
YKL002W	422.476	-0.561848	0.59818	-0.939262
YNL051W	422.497	-1.20794	0.656149	-1.84095
YIL150C	422.804	-0.218684	0.616468	-0.354737
YLR205C	422.822	-2.12527	0.780464	-2.72309
YNR059W	422.868	-0.288401	0.600128	-0.480565
YJL031C	422.955	-0.0194911	0.588927	-0.0330959
YPL269W	423.377	-0.575629	0.618429	-0.930793
YLR056W	423.443	-0.647777	0.587016	-1.10351
YER124C	424.35	-0.0499234	0.654154	-0.0763175
YKL007W	426.211	-2.19515	0.690232	-3.18031
YOR083W	426.316	-1.066	0.635886	-1.6764
YOL111C	426.716	-0.820116	0.626997	-1.30801
YNL326C	427.125	-0.0141951	0.594747	-0.0238675
YKL141W	427.33	-3.7017	0.686158	-5.39482
YDL091C	428.302	-1.88248	0.675881	-2.78522
YBR119W	429.64	-0.10253	0.611259	-0.167735
YLR424W	430.058	-0.608948	0.594618	-1.0241
YKR105C	430.766	-2.2534	0.611523	-3.6849
YMR027W	430.987	-0.809722	0.631933	-1.28134
YER003C	431.175	-0.130885	0.597082	-0.219207
YPL014W	431.544	-1.39937	0.738479	-1.89494
YDR272W	431.846	-1.08218	0.604394	-1.79052
YDR298C	432.043	-0.519277	0.587406	-0.884017
YDR470C	432.292	-2.08553	0.638977	-3.26385
YPL149W	432.37	-0.651835	0.654015	-0.996667
YLR421C	432.594	-1.27994	0.665885	-1.92217
YMR103C	432.733	-5.88645	0.681272	-8.64038
YGR268C	433.14	-0.891257	0.639046	-1.39467
YDL109C	433.914	-0.27315	0.605781	-0.450906
YMR030W	434.137	-1.3964	0.62606	-2.23046
YMR149W	435.288	-0.0123185	0.597091	-0.0206309
YDR162C	435.313	-0.433229	0.593351	-0.73014
YIL001W	436.796	-0.709773	0.619416	-1.14587
YPL277C	436.81	-0.0237392	0.628996	-0.0377414
YDR318W	438.711	-0.657081	0.62151	-1.05723
YCL001W	439.26	-0.316589	0.59288	-0.533985
YGL231C	439.725	-0.0685846	0.613233	-0.111841
YCL004W	439.871	-0.386922	0.591445	-0.654198
YML070W	439.915	-1.93752	0.622709	-3.11144
YEL077C	440.662	-1.34265	0.622288	-2.1576
YDL105W	441.856	-0.511236	0.604041	-0.846359
YGR284C	442.529	-1.78166	0.618821	-2.87912
YPL161C	442.716	-0.688954	0.6123	-1.12519
YKR035W-A	444.956	-0.8947	0.621908	-1.43864
YIL002C	445.4	-2.80804	0.646309	-4.34473
YCR006C	445.482	-2.48193	0.702031	-3.53536
YML003W	445.496	-2.94946	0.672206	-4.38773
YDR498C	445.503	-0.0912883	0.586164	-0.155738
YIL067C	446.389	-1.4052	0.586164	-2.39729
YBR098W	446.502	-1.78885	0.589457	-3.03474
YIL088C	446.759	-1.22524	0.656315	-1.86684
YLR289W	447.95	-0.623897	0.589975	-1.0575
YPL132W	448.323	-0.288796	0.591442	-0.488292
YER112W	448.481	-0.391526	0.638861	-0.61285
YJR010W	449.315	0.0239404	0.619393	0.0386514
YMR023C	449.497	-0.179223	0.633182	-0.283052
YKL035W	449.606	-2.83086	0.652605	-4.33778
YPL249C	450.772	-1.20678	0.619178	-1.949
YBR076C-A	451.31	-0.51132	0.594321	-0.860343
YCL024W	451.798	-0.931482	0.606569	-1.53566
YDR018C	451.802	-5.31103	0.774406	-6.8582
YGR141W	452.21	-1.20736	0.609921	-1.97954
YNL159C	452.651	-1.908	0.634356	-3.00778
YLR079W	452.804	-0.840673	0.600346	-1.40031
YOL048C	455.033	-4.0716	0.67963	-5.99091
YJR139C	455.579	-0.0456997	0.590282	-0.0774201
YNR033W	456.039	-0.636295	0.588117	-1.08192
YNL218W	456.323	-0.722651	0.58447	-1.23642
YMR090W	456.394	-1.90576	0.736641	-2.5871
YGL083W	457.227	-0.245893	0.643347	-0.382209
YLR025W	457.562	-0.398007	0.600069	-0.663268
YCL052C	457.637	-2.09295	0.668458	-3.131
YPR135W	458.059	-1.45187	0.585433	-2.48
YKL113C	458.183	-0.330689	0.582821	-0.567394
YML118W	459.2	-1.27966	0.618117	-2.07025
YDR118W	459.494	-0.562129	0.583489	-0.963392
YJR006W	459.515	-0.753317	0.616994	-1.22095
YGL060W	460.223	-1.04945	0.615732	-1.7044
YDR504C	460.493	-1.42638	0.683941	-2.08553
YIL153W	460.681	-0.269772	0.679435	-0.397054
YGR024C	460.837	-0.0418421	0.591471	-0.0707425
YEL030W	461.157	-1.81523	0.611312	-2.9694
YER101C	461.27	-0.642977	0.61408	-1.04706
YLR188W	461.854	-0.122578	0.592526	-0.206874
YER118C	462.65	0.013975	0.596477	0.0234292
YML020W	462.771	-0.612606	0.587658	-1.04245
YNL323W	462.88	-0.0345815	0.600237	-0.0576132
YGR163W	463.124	-0.354503	0.587376	-0.603537
YDR316W	463.396	-0.364925	0.601683	-0.606507
YLR258W	464.091	-3.23509	0.631412	-5.12358
YKR051W	464.542	-0.922306	0.601228	-1.53404
YHR092C	465.146	-0.34288	0.713935	-0.480268
YKL222C	465.214	-0.437836	0.619429	-0.706838
YMR174C	465.5	-3.80421	0.8724	-4.36063
YLR240W	466.656	-1.58372	0.635906	-2.49049
YDL173W	466.892	-0.0124005	0.607148	-0.0204242
YMR284W	467.1	-2.94846	0.614329	-4.79947
YDL077C	467.378	-1.14961	0.598554	-1.92065
YGR235C	467.879	-0.618698	0.596972	-1.03639
YNR066C	467.93	-2.11826	0.679298	-3.11831
YPL189C-A	468.143	-1.09939	0.629423	-1.74666
YDR375C	468.347	-0.988706	0.612544	-1.6141
YDR229W	469.731	-0.882573	0.619963	-1.42359
YBL050W	470.857	-0.474074	0.587645	-0.806736
YDR131C	471.464	-1.03036	0.661354	-1.55796
YML062C	471.999	-0.0590578	0.627791	-0.0940724
YLL023C	472.437	-2.85878	0.668923	-4.27371
YCR095C	472.816	-0.164802	0.620523	-0.265585
YKL133C	473.107	-1.53036	0.636573	-2.40406
YNL225C	473.704	-0.311494	0.586185	-0.531393
YGL160W	474.09	-1.49247	0.593111	-2.51635
YJL137C	474.402	-0.538846	0.600597	-0.897183
YKL085W	474.83	-2.40975	0.622442	-3.87144
YNL165W	474.974	-1.19052	0.60495	-1.96797
YGR006W	475.08	-0.462336	0.595872	-0.775898
YJL071W	475.231	0.0259047	0.583004	0.0444332
YIL071C	475.805	-1.15859	0.592353	-1.95592
YPL172C	477.608	-0.388119	0.584951	-0.663506
YGL223C	477.693	-0.916761	0.585698	-1.56525
YOL159C	478.236	-2.09823	0.587512	-3.57137
YPL163C	478.293	-0.964125	0.632854	-1.52346
YBR274W	478.736	-0.764869	0.589491	-1.29751
YGR154C	479.293	-0.63857	0.610823	-1.04542
YMR281W	479.499	-0.616673	0.631744	-0.976144
YMR004W	480.862	-1.29582	0.626279	-2.06907
YNL230C	481.271	-0.252625	0.613107	-0.412041
YGL146C	481.471	-2.39211	0.637894	-3.75001
YOR087W	481.531	-1.05941	0.631081	-1.67873
YDL220C	481.699	-1.17534	0.590269	-1.9912
YMR224C	481.966	-0.761396	0.583779	-1.30426
YLR005W	483.805	-0.108995	0.58143	-0.18746
YDR108W	483.821	-0.780891	0.587905	-1.32826
YLR381W	484.126	-1.51476	0.613073	-2.47076
YNL263C	485.044	-0.0874869	0.612835	-0.142758
YBL049W	485.067	-0.691342	0.639905	-1.08038
YLL050C	485.647	-1.09662	0.667789	-1.64216
YER059W	486.348	-1.85205	0.630459	-2.93762
YGL010W	486.36	-2.84363	0.688377	-4.13092
YAL028W	487.584	-3.49519	0.691156	-5.05702
YBR129C	487.657	-0.213825	0.605634	-0.35306
YDL030W	487.863	-0.0580412	0.610652	-0.0950479
YKL121W	488.22	-1.88833	0.645376	-2.92593
YCL002C	488.649	-0.369241	0.583149	-0.633184
YLL024C	488.709	-1.23699	0.663655	-1.8639
YOR352W	488.901	-2.20374	0.65995	-3.33925
YGR007W	489.005	-0.0808845	0.634018	-0.127574
YBR273C	489.121	-0.910259	0.600831	-1.515
YGR212W	489.776	-0.0875231	0.589028	-0.148589
YML104C	490.626	-0.501564	0.582166	-0.861548
YDR068W	490.94	-0.0893084	0.595797	-0.149897
YHR199C	491.863	-0.668069	0.615796	-1.08489
YKL107W	492.087	-4.59625	0.697826	-6.58653
YLR144C	492.387	-0.00757431	0.582477	-0.0130036
YMR161W	492.606	-0.0309029	0.585909	-0.0527435
YCR082W	493.664	-1.13503	0.604537	-1.87752
YMR077C	493.816	-0.150969	0.628304	-0.24028
YDR119W-A	494.364	-1.55452	0.644962	-2.41025
YJR068W	494.413	-0.233523	0.596936	-0.391203
YGR167W	494.459	-1.50152	0.677525	-2.21619
YPL162C	494.61	-1.08141	0.584318	-1.85072
YGL121C	495.771	-2.56231	0.633328	-4.04579
YIR001C	495.793	-1.13866	0.598839	-1.90144
YPL170W	496.253	-1.15335	0.58432	-1.97384
YPR160W	496.384	-5.45913	0.752815	-7.25162
YER053C	496.589	-0.155486	0.615403	-0.252658
YKL152C	497.305	-2.5406	0.67791	-3.74769
YHR194W	499.38	-1.68158	0.610897	-2.75265
YFL042C	501.281	-2.07975	0.667584	-3.11534
YGR193C	501.517	-0.726885	0.627607	-1.15818
YGR161W-C	502.312	-0.654109	0.603956	-1.08304
YKR017C	503.987	-1.63548	0.656988	-2.48936
YBR044C	504.848	-1.16395	0.603959	-1.92721
YOR158W	504.948	-0.629127	0.625104	-1.00644
YMR056C	505.124	-1.43897	0.585237	-2.45878
YDR533C	505.494	-2.68724	0.691052	-3.88863
YKL192C	505.583	-0.566764	0.620877	-0.912843
YLR220W	506.481	-0.752604	0.589267	-1.27719
YPR179C	506.543	-0.388441	0.611649	-0.635073
YDR030C	507.531	-0.801593	0.59185	-1.35439
YOR192C	509.484	-0.774088	0.603307	-1.28308
YJL091C	509.805	-0.942607	0.635196	-1.48396
YOR246C	511	-0.0311944	0.61449	-0.0507646
YLR085C	511.761	-0.301236	0.585581	-0.514422
YDR506C	512.621	-1.90103	0.631418	-3.01073
YBR242W	512.672	-0.0919411	0.595131	-0.154489
YBR168W	513.093	-0.970113	0.60628	-1.60011
YKL168C	513.652	-3.38717	0.645195	-5.24984
YOR132W	513.804	-1.71371	0.629018	-2.72442
YGL213C	515.529	-0.0421478	0.580722	-0.0725783
YHR114W	517.138	-1.29182	0.632415	-2.04268
YJL004C	517.47	-0.675918	0.584578	-1.15625
YJL082W	518.027	-0.397767	0.594702	-0.668851
YLR453C	518.658	-0.858084	0.584405	-1.4683
YDR475C	518.937	-0.207437	0.587605	-0.353021
YDR125C	519.55	-1.02807	0.579233	-1.77487
YKR004C	520.549	-0.0474695	0.590762	-0.080353
YFL055W	520.7	-2.56249	0.622436	-4.11687
YMR114C	523.89	-2.78201	0.595601	-4.67093
YER027C	523.972	-1.29475	0.617566	-2.09653
YDR314C	525.001	-0.559946	0.609744	-0.918329
YGR019W	525.512	-3.15204	0.659797	-4.77729
YDR387C	526.007	-0.557362	0.58128	-0.958852
YFR001W	526.238	-0.0652535	0.613597	-0.106346
YOR380W	527.185	-0.0161504	0.581477	-0.0277748
YAL042W	528.777	-0.0822415	0.578839	-0.14208
YLR260W	529.364	-1.44669	0.624315	-2.31725
YNL052W	529.807	-1.10987	0.630144	-1.7613
YDL188C	529.844	-1.54343	0.611005	-2.52605
YAL032C	530.577	-0.813371	0.579363	-1.40391
YDR059C	530.943	-1.65583	0.637307	-2.59816
YNL273W	531.398	-1.68264	0.582347	-2.88941
YMR099C	531.408	-0.936194	0.616717	-1.51803
YBR151W	531.507	-1.64714	0.650856	-2.53073
YOR193W	531.622	-1.95408	0.640967	-3.04865
YKL117W	532.305	-3.04256	0.736112	-4.13328
YHR091C	532.481	-1.049	0.60684	-1.72862
YKR084C	532.872	-0.338189	0.586885	-0.576245
YHR200W	533.384	-0.741293	0.64302	-1.15283
YCL009C	533.756	-0.121318	0.578765	-0.209615
YOR080W	535.073	-0.62035	0.632013	-0.981547
YGL208W	536.789	-2.90491	0.587013	-4.94863
YHR117W	536.857	-1.7582	0.6514	-2.6991
YOR112W	536.895	-0.0438144	0.590169	-0.0742405
YNL138W	537.248	-2.86213	0.695845	-4.11318
YHR004C	537.947	-2.35731	0.697828	-3.37807
YCR094W	537.968	-0.720189	0.638057	-1.12872
YPL072W	538.117	-0.506348	0.615682	-0.822418
YIL051C	538.571	-2.04074	0.653687	-3.12189
YOR155C	539.139	-1.03409	0.615344	-1.68051
YGR256W	540.408	-4.2624	0.74699	-5.70611
YLR199C	540.41	0.00631996	0.589077	0.0107286
YHL036W	540.5	-0.937743	0.578559	-1.62082
YNR034W	540.532	-0.333079	0.654943	-0.508562
YPR158W	541.192	-3.47095	0.666621	-5.20678
YDL156W	541.502	-0.175891	0.586308	-0.299997
YOR215C	541.978	-4.11563	0.763693	-5.38912
YJR131W	542.642	-1.15795	0.578861	-2.00039
YDR357C	543.05	-2.74257	0.59089	-4.64143
YPR129W	543.165	-0.368399	0.61924	-0.594921
YPL109C	545.205	-3.08976	0.683343	-4.52154
YNL071W	545.693	-2.10428	0.656845	-3.20361
YDR423C	545.876	-0.198484	0.588693	-0.337161
YPL236C	545.981	-0.701994	0.591831	-1.18614
YKL149C	546.108	-1.90235	0.607665	-3.13059
YMR068W	547.63	-0.130989	0.59195	-0.221284
YNL306W	548.439	-0.59302	0.578635	-1.02486
YHR111W	549.176	-0.184128	0.579325	-0.317832
YJL102W	549.519	-3.15659	0.748088	-4.21954
YEL053C	550.14	-0.53991	0.59881	-0.901637
YGR166W	550.3	-0.34367	0.616364	-0.557576
YBR211C	550.47	-0.662334	0.590393	-1.12185
YDL161W	551.187	-1.34673	0.678049	-1.98618
YLR452C	551.514	-1.01163	0.603291	-1.67686
YNL048W	551.682	-0.27225	0.596983	-0.456043
YDR330W	552.497	-4.14493	0.709421	-5.84269
YMR072W	553.18	-1.26071	0.601919	-2.09448
YDR538W	553.725	-0.155287	0.597713	-0.259802
YMR092C	554.472	-0.746716	0.597288	-1.25018
YJR092W	555.099	-0.841238	0.590712	-1.42411
YNL084C	556.48	-0.317955	0.614927	-0.517061
YIL124W	558.587	-5.22568	0.766716	-6.81567
YLR286C	558.594	-0.940824	0.596767	-1.57654
YDL193W	558.619	-0.520064	0.638895	-0.814005
YHR002W	559.191	-1.1122	0.593533	-1.87386
YDL006W	559.776	-0.596033	0.586673	-1.01595
YKL016C	559.903	-1.71213	0.647281	-2.64511
YML067C	560.145	-0.567518	0.599447	-0.946736
YPL153C	560.466	-1.87196	0.612302	-3.05725
YOR332W	560.565	-0.087903	0.636885	-0.13802
YJL206C	561.946	-1.04391	0.601626	-1.73515
YKL197C	562.195	-1.56339	0.580701	-2.69224
YDR404C	563.083	-0.00227986	0.590041	-0.00386391
YDL129W	563.715	-0.629419	0.593517	-1.06049
YLR072W	563.755	-1.42884	0.612926	-2.33117
YNL257C	563.769	-1.57376	0.62448	-2.52011
YNL277W	564.376	-0.383524	0.625738	-0.612915
YOR347C	564.625	-2.57295	0.61999	-4.14999
YDL123W	564.996	-0.251319	0.593328	-0.423575
YOR084W	566	-1.83701	0.670894	-2.73816
YJL140W	566.665	-0.0281299	0.594322	-0.0473311
YJL166W	566.995	-2.99846	0.678576	-4.41875
YDL029W	567.386	-2.69296	0.700192	-3.84602
YDL141W	568.583	-0.187755	0.609826	-0.307882
YJR101W	569.012	-0.0349736	0.584753	-0.0598092
YFR017C	569.332	-4.81709	0.68282	-7.0547
YGL130W	570.26	-0.13114	0.586686	-0.223526
YER012W	570.579	-2.11016	0.700969	-3.01035
YDR105C	571.002	-0.336297	0.579798	-0.580025
YCR054C	571.438	-0.222934	0.588869	-0.378581
YLR250W	571.587	-0.974521	0.594404	-1.63949
YPL219W	571.682	-0.838473	0.622834	-1.34622
YDR307W	572.016	-0.747805	0.586058	-1.27599
YGL080W	572.543	-2.45795	0.699026	-3.51624
YDR369C	572.696	-1.87365	0.602475	-3.10993
YBR284W	572.827	-1.17848	0.794604	-1.48311
YHL048W	573.723	-1.53714	0.69728	-2.20448
YLR238W	574.146	-0.0879332	0.60486	-0.145378
YGL191W	574.717	-1.59466	0.644814	-2.47305
YDL027C	575.662	-2.68522	0.64832	-4.14181
YBR270C	576.029	-0.56115	0.582088	-0.964029
YLR089C	577.394	-0.476863	0.585498	-0.814457
YEL012W	577.444	-3.40553	0.62293	-5.46696
YLR438W	577.681	-0.633584	0.640625	-0.98901
YKL087C	577.737	-0.335888	0.587645	-0.571584
YER032W	578.845	-0.537154	0.580624	-0.925133
YHR174W	578.897	-1.53725	0.626908	-2.45212
YNL280C	580.916	-1.43022	0.642274	-2.2268
YKL161C	581.424	-1.77158	0.599441	-2.95538
YPR168W	582.645	-0.0112355	0.577669	-0.0194497
YNL173C	583.491	-5.69934	0.71868	-7.93028
YIL077C	583.494	-1.52077	0.626902	-2.42584
YJR078W	583.63	-0.083497	0.583531	-0.143089
YIL076W	583.8	-0.499696	0.587663	-0.85031
YER143W	584.353	-3.1152	0.688868	-4.5222
YJL144W	585.501	-3.07004	0.646802	-4.74649
YKL093W	585.858	-3.62171	0.628371	-5.76364
YDR386W	585.932	-0.0693214	0.59401	-0.116701
YNL270C	588.326	-4.64473	0.665311	-6.9813
YMR115W	588.65	-1.06875	0.609389	-1.7538
YGR199W	589.458	-1.26913	0.693995	-1.82873
YOR181W	589.667	-1.5427	0.669017	-2.30592
YJR155W	589.812	-0.759638	0.605197	-1.25519
YNL030W	591.648	-0.134858	0.587626	-0.229497
YMR188C	592.441	-0.0759471	0.598437	-0.126909
YDR436W	592.62	-2.43894	0.630703	-3.86702
YDR448W	592.758	-0.091176	0.602744	-0.151268
YER103W	593.876	-0.113303	0.577846	-0.196078
YBR223C	594.168	-1.78354	0.613215	-2.9085
YPL123C	594.242	-3.38024	0.694666	-4.866
YDR328C	594.365	-0.76518	0.598583	-1.27832
YLR418C	594.901	-0.0516837	0.587364	-0.0879926
YDL033C	595.029	0.0235243	0.6004	0.0391811
YGL084C	596.835	-1.21855	0.599323	-2.03321
YML061C	596.958	-0.402986	0.579739	-0.695116
YLR350W	599.479	-1.11145	0.673778	-1.64958
YKR016W	599.91	-0.235912	0.58066	-0.406282
YMR137C	600.484	-0.224713	0.586413	-0.3832
YPL248C	600.797	-3.31744	0.711081	-4.66535
YBR251W	601.128	-0.0591114	0.582555	-0.101469
YJL181W	601.294	-0.449711	0.583236	-0.771062
YGR183C	602.21	-2.2019	0.618362	-3.56086
YGR127W	602.705	-1.12462	0.706082	-1.59276
YOR149C	603.154	-0.526444	0.582813	-0.903281
YKR103W	604.256	-0.625093	0.640368	-0.976146
YOL057W	605.496	-1.26387	0.620496	-2.03687
YJR125C	605.6	-1.13365	0.628643	-1.80333
YOL044W	606.552	-0.254874	0.587534	-0.433802
YLR090W	606.568	-0.0879172	0.578262	-0.152037
YDR057W	606.668	-0.502192	0.603263	-0.832459
YHL009C	606.87	-0.0280192	0.590427	-0.0474558
YLR356W	606.968	-3.25873	0.63939	-5.09663
YMR282C	607.709	-0.3698	0.579955	-0.637635
YDR529C	607.883	-2.56807	0.626057	-4.10197
YNL037C	608.033	-0.788091	0.636599	-1.23797
YBR131W	609.208	-0.190284	0.601593	-0.316301
YFR013W	610.159	-0.154231	0.582678	-0.264693
YDL099W	610.419	-0.297808	0.655545	-0.454291
YBL106C	611.087	-1.55077	0.690354	-2.24634
YOR320C	611.787	-0.12388	0.590826	-0.209673
YDR177W	613.412	-0.910414	0.589825	-1.54353
YBR173C	613.898	-0.484214	0.608811	-0.795344
YOR059C	614.508	-0.236224	0.578753	-0.40816
YIL070C	615.389	-0.146777	0.586203	-0.250385
YDR444W	615.451	-0.375175	0.583914	-0.642517
YGR276C	615.462	-0.518321	0.579176	-0.894929
YEL056W	615.734	-0.74184	0.609599	-1.21693
YOR221C	616.655	-1.19838	0.645047	-1.85782
YCR089W	617.076	-0.206889	0.576906	-0.358619
YNL295W	617.634	-0.229078	0.636119	-0.360119
YGR223C	617.744	-1.41962	0.626201	-2.26704
YDL042C	619.051	-0.198508	0.626074	-0.317068
YBR276C	619.314	-0.353624	0.596231	-0.593099
YER116C	619.691	-0.896619	0.578761	-1.5492
YDR137W	620.42	-0.705753	0.586532	-1.20326
YPR191W	620.484	-3.51849	0.695201	-5.06111
YOR157C	620.874	-0.932534	0.698325	-1.33539
YLR143W	621.047	-0.38571	0.591722	-0.651842
YDL079C	621.231	-4.73307	0.744477	-6.35757
YER051W	621.764	0.00934906	0.588347	0.0158904
YKL013C	622.141	-1.65767	0.649879	-2.55073
YNL126W	622.672	-1.13113	0.62189	-1.81886
YHR074W	623.487	-1.07804	0.606102	-1.77864
YMR306W	624.199	-0.261184	0.594211	-0.439548
YER080W	624.653	-0.937418	0.603973	-1.55209
YDR197W	625.639	-1.98542	0.591711	-3.35539
YOL082W	625.678	-1.37798	0.649752	-2.12077
YMR029C	626.012	-1.72562	0.669614	-2.57704
YBR008C	628.149	0.0301115	0.615476	0.0489239
YDR221W	628.626	-0.408563	0.592238	-0.689863
YJL057C	632.29	-2.08974	0.629595	-3.31919
YGL241W	632.96	-1.26649	0.605188	-2.09273
YML029W	633.512	-0.845478	0.62707	-1.3483
YPL074W	633.524	-0.230948	0.620448	-0.372228
YOL113W	633.932	-2.47251	0.641582	-3.85378
YMR017W	634.825	-0.252363	0.627435	-0.402213
YDR460W	634.842	-0.126085	0.586824	-0.214859
YPL078C	635.231	-1.92725	0.636695	-3.02696
YPR106W	635.395	-0.725747	0.624449	-1.16222
YGR278W	640.149	0.0165588	0.582998	0.0284028
YDL010W	640.611	-0.0812603	0.608079	-0.133634
YLR099C	640.646	-0.0637371	0.610163	-0.104459
YPL214C	641.086	-0.0666018	0.577445	-0.115339
YMR167W	641.734	-0.253755	0.581403	-0.436453
YDR246W	642.217	-0.99642	0.664304	-1.49995
YNL077W	642.979	-2.18545	0.614568	-3.55607
YML013W	643.039	-1.4144	0.678804	-2.08366
YGL028C	643.399	-0.77194	0.590033	-1.3083
YNL160W	644.57	-0.0610309	0.739542	-0.0825253
YNL073W	644.94	-0.717305	0.607197	-1.18134
YNR065C	645.208	-1.84304	0.616392	-2.99005
YPL028W	646.463	-1.13896	0.642617	-1.77237
YPL100W	647.291	-1.34466	0.638503	-2.10596
YCR004C	647.405	-4.74906	0.787632	-6.02954
YJL085W	648.24	-0.0783208	0.592048	-0.132288
YMR118C	648.356	-6.06274	0.730369	-8.30093
YLR148W	648.492	-1.62309	0.598801	-2.71057
YLR273C	648.882	-4.02219	0.652824	-6.16122
YOL023W	650.334	-0.0512165	0.58632	-0.0873525
YKR075C	650.682	-1.71995	0.935398	-1.83874
YDR242W	651.846	-0.0111669	0.580688	-0.0192305
YLR417W	651.894	-1.66867	0.676157	-2.46788
YEL065W	652.65	-0.0748087	0.624831	-0.119726
YKR002W	653.293	-0.950705	0.580952	-1.63646
YGL115W	654.48	-0.428644	0.585805	-0.731719
YHR086W	654.975	-1.1684	0.606555	-1.92628
YMR062C	655.455	-0.0902456	0.583955	-0.154542
YAR007C	655.98	-1.81845	0.667995	-2.72225
YML023C	656.152	-0.483319	0.598022	-0.808195
YOR377W	656.479	-1.67315	0.684029	-2.44602
YHL003C	656.655	-0.00798613	0.580344	-0.013761
YDR306C	657.022	-2.00035	0.619845	-3.22719
YLR208W	658.004	-0.524133	0.610225	-0.858918
YKL189W	658.13	-1.56284	0.68054	-2.29647
YDR354W	658.224	-0.302258	0.617627	-0.489386
YJL146W	658.712	-0.88753	0.6023	-1.47357
YOR071C	658.994	-0.248032	0.578498	-0.428751
YKR023W	661.617	-0.0720851	0.612737	-0.117644
YPL118W	661.978	-1.34026	0.629667	-2.12852
YCR069W	662.527	-0.978128	0.62999	-1.55261
YIL097W	663.924	-2.28278	0.640893	-3.56188
YBR016W	664.658	-1.39342	0.734567	-1.89693
YGL090W	665.25	0.0174587	0.589297	0.0296263
YBR259W	665.363	-0.210448	0.575421	-0.365728
YBR147W	665.968	-2.82854	0.668292	-4.23249
YJL115W	666.296	-0.197644	0.629026	-0.314206
YKL065C	666.304	-2.49617	0.65357	-3.81929
YLR088W	666.355	-0.352052	0.575518	-0.611714
YOL119C	668.542	0.0249599	0.596563	0.0418396
YKL026C	669.918	-6.44713	0.803558	-8.02323
YDR358W	671.19	-5.39663	0.782535	-6.89635
YOR128C	671.52	-0.237954	0.680778	-0.349532
YHL017W	671.808	-1.00143	0.598677	-1.67273
YCL044C	672.065	-0.0963152	0.59896	-0.160804
YCR012W	673.87	-2.40365	0.690555	-3.48076
YCL064C	674.35	-2.34221	1.11226	-2.1058
YCR066W	674.508	-0.189393	0.583817	-0.324405
YHR188C	674.956	-1.75052	0.639834	-2.73589
YDR434W	675.033	-0.41889	0.582449	-0.719187
YBR103W	675.227	-0.437291	0.585428	-0.74696
YKR076W	675.919	-1.64504	0.738588	-2.22728
YHR209W	675.941	-2.44288	0.584776	-4.17746
YBR110W	677.002	-0.374191	0.579016	-0.646254
YER004W	677.013	-1.33784	0.598873	-2.23393
YJL132W	677.082	-1.52469	0.624412	-2.44179
YML012W	677.247	-0.628029	0.603048	-1.04142
YKR011C	677.595	-4.29787	0.759398	-5.65958
YKL116C	678.09	-0.4163	0.577648	-0.720682
YBR123C	678.225	-0.30079	0.586747	-0.51264
YFR010W	678.895	-1.52113	0.706755	-2.15227
YBR056W	679.204	-4.64498	0.796703	-5.83025
YBR221C	679.335	-1.34216	0.667317	-2.01128
YDR494W	679.702	-0.757074	0.612498	-1.23604
YJL001W	680.02	-2.19578	0.681694	-3.22107
YOR042W	683.659	-1.08597	0.668797	-1.62377
YJR040W	683.845	-0.130558	0.578909	-0.225525
YKL196C	684.659	-0.977094	0.614503	-1.59006
YIL041W	685.124	-0.932869	0.615792	-1.51491
YGR252W	688.166	-0.132224	0.581842	-0.22725
YFR038W	688.838	-0.304367	0.594497	-0.511974
YNL008C	688.955	-0.206871	0.578616	-0.357528
YGL027C	689.006	-0.0926168	0.584043	-0.158579
YDL164C	689.138	-0.202474	0.675358	-0.299803
YDR320C	689.54	-0.471215	0.618826	-0.761466
YDR405W	689.603	-0.356519	0.584023	-0.610454
YDL115C	690.8	-1.31159	0.625284	-2.09759
YDL159W	690.874	-0.959975	0.594915	-1.61364
YDR155C	690.897	-2.89613	0.742826	-3.8988
YFR014C	692.038	-2.42096	0.706063	-3.42882
[truncated: 1,204 more rows]
[truncated: 2 more columns]
